# Supplementary material for: Stereocontrolled four-carbon homologation of vicinally functionalized allylic pyrrolidines to highly customized azonines bearing remote benzylic stereocenters
Source: Royal Society of Chemistry journal article supplement (doi:10.1039/d5ra03502c), 2025-01-01
Supplement: d5ra03502c1.pdf [file d5ra03502c1.pdf]

Supporting Information for:

Stereocontrolled four-carbon homologation of vicinally functionalized allylic pyrrolidines to  
highly customized azonines bearing remote benzylic stereocenters

*Timothy K. Beng,\* Ailan Johnsen, Alan Gitonga, and Jasleen Kaur*

*Department of Chemistry, Central Washington University,  
Ellensburg, WA 98926, USA  
[Timothy.beng@cwu.edu](mailto:Timothy.beng@cwu.edu)*

*Contents:*

|                                                         |     |
|---------------------------------------------------------|-----|
| 1. General Experimental Information and Procedures..... | S2  |
| 2. Scheme 1 Results .....                               | S4  |
| 3. Scheme 2 Results .....                               | S35 |
| 4. References .....                                     | S89 |

## 2. Experimental Section

All experiments involving air and moisture-sensitive reagents were carried out under an inert atmosphere of nitrogen and using freshly distilled solvents. Freshly purchased 2,2,5,5-tetramethyloxolane (TMO) and hexafluoroisopropanol (HFIP) were stored under 4 Å molecular sieves for several days prior to use. Tetrahydrofuran (THF) and 2-methyltetrahydrofuran (2-MeTHF) were distilled from sodium benzophenone ketyl. Other reagents were purchased at the highest commercial quality and used without further purification, unless otherwise stated. All amines, enals, Grignard reagents, and potassium carbonate were newly purchased and used without further purification. Column chromatography was performed on silica gel (230-400 mesh). Thin-layer chromatography (TLC) was performed using Silicycle Siliaplate™ glass backed plates (250 µm thickness, 60 Å porosity, F-254 indicator) and visualized using UV (254 nm). Unless otherwise indicated, <sup>1</sup>H NMR spectral data were acquired using CDCl<sub>3</sub> as solvent, at room temperature. Chemical shifts are quoted in parts per million (ppm) referenced to 0.00 ppm for TMS. The following abbreviations (or combinations thereof) were used to explain multiplicities: s = singlet, d = doublet, t = triplet, q = quartet, m = multiplet, br = broad. Coupling constants, J, were reported in Hertz unit (Hz). <sup>13</sup>C NMR spectra were recorded on Bruker DRX-400 was fully decoupled by broadband proton decoupling. Chemical shifts were reported in ppm referenced to the center line of a triplet at 77.16 ppm of CDCl<sub>3</sub>. HRMS-EI<sup>+</sup> data were obtained using either electron spray ionization (ESI) or electron impact (EI) techniques. High-resolution ESI was obtained on an LTQ-FT (ion trap; analyzed using Excalibur). High resolution EI was obtained on an Autospec (magnetic sector; analyzed using MassLynx). The 1,3-azadienes employed in General Procedure A were prepared as previously reported.<sup>1</sup>

**General Procedure A: Reaction of 1,3-azadienes with succinic anhydride<sup>2</sup>:** A 20 mL screw-cap vial was flame-dried, evacuated and flushed with nitrogen. A solution of the 1,3-azadiene (5.0 mL, 0.10 M in freshly distilled TMO) was added to the vial at room temperature followed by succinic anhydride (500 mg, 5 mmol, 1.0 equiv). The contents were placed in a pre-heated oil bath thermostatted 90 °C. After complete consumption of the 1,3-azadiene (as judged by TLC, GC-MS, and NMR), the mixture/suspension was cooled to room temperature and washed several times with petroleum ether, then concentrated under reduced pressure to afford the lactam acid.

**General Procedure B: LAH reduction:** To a 10 mL round-bottomed flask equipped with a magnetic stir bar under a N<sub>2</sub> atmosphere, in a 0 °C ice/water bath, was added the lactam (1.0 mmol) and THF (50 mL). LiAlH<sub>4</sub> (220 mg, 5.6 mmol) was then added portion-wise. The reaction mixture was allowed to warm to room temperature overnight (judged complete by GC-MS analysis). After this time (typically 18 h), the reaction mixture was cooled to 0 °C and quenched by slow addition of a solution of 2 N NaOH<sub>(aq)</sub> (1 mL). The organic layer was decanted into a clean flask. The aqueous layer was extracted with EtOAc (3 × 5 mL). The combined organic layers were placed in a separatory funnel and washed with brine, then dried over anhydrous Na<sub>2</sub>SO<sub>4</sub>. It was filtered and concentrated *in vacuo* to yield the crude tertiary amine as an oil, which was subjected to column chromatography on silica gel eluting with hexanes/acetone.

**General procedure C: Methyl esterification of the lactam acid:** To a stirring suspension of the acid (1 mmol), dissolved in DMF (5 mL), and K<sub>2</sub>CO<sub>3</sub> (414.6 mg, 3 mmol, 3 equiv) was added methyl iodide (0.12 mL, 2 mmol, 2 equiv) under a nitrogen atmosphere. The reaction mixture was stirred for 18 h (TLC monitoring). After complete conversion, it was diluted with water and extracted with EtOAc (3×20 mL). The combined organic extracts were washed with brine, dried over Na<sub>2</sub>SO<sub>4</sub> and concentrated *in vacuo* to give the desired ester, which was purified by flash chromatography on silica.

**General procedure D: Grignard addition:** To a stirred solution of lactam-ester (1.0 mmol, 1.0 equiv) in dry THF (10 mL) cooled to -78 °C, was added a solution of the corresponding Grignard reagent (2.2 mmol, 2.2 equiv) dropwise. After stirring for 10 min at -78 °C, the reaction mixture was warmed to room temperature and stirred for 5 h. After the reaction was complete, as ascertained by GC-MS or TLC, the reaction mixture was quenched with saturated aqueous NH<sub>4</sub>Cl, and diluted with EtOAc. The layers were separated and the aqueous later was extracted with EtOAc. The combined organic layers with dried over Na<sub>2</sub>SO<sub>4</sub>, filtered, and concentrated *in vacuo*. Where it was necessary (most of the Grignard reagents employed in these studies did not require further purification before the next step), flash chromatography on silica gel (hexane/AcOEt) afforded the lactam-tethered alkenols.

**General procedure E: Four-carbon ring expansion of allylic pyrrolidine methanols:** To a stirred solution of allylic pyrrolidine methanol **6/7** (1.0 mmol, 1.0 equiv) in HFIP (5 mL), was added the terminal alkyne (methyl propiolate or ethyl propiolate, 2.0 equiv) in one portion. The reaction mixture was stirred at room temperature. After the reaction was complete, as ascertained by GC-MS and/or TLC (usually 2 or 3 days), the reaction mixture was concentrated *in vacuo* to

remove the HFIP. The crude product was then redissolved in DCM and directly subjected to flash chromatography on silica gel (hexanes/acetone) to afford the desired 9-membered ring azaheterocycles (*i.e.*, **8**).

## Scheme 1 results

### Compound 6a

Prepared in 2.0 mmol scale using **General Procedures A** and **B**. Purification: Flash chromatography on silica eluting with hexane/acetone (90:10 to 50:50). Greenish-yellow oil. Yield = 453.0 mg, 88%, 95:5 dr.  $^1\text{H}$  NMR (400 MHz,  $\text{CDCl}_3$ )  $\delta$  7.25 – 7.08 (m, 5H), 6.37 (s, 1H), 5.83 (dddd,  $J$  = 17.6, 10.1, 7.8, 5.2 Hz, 1H), 5.10 (dq,  $J$  = 17.0, 1.6 Hz, 1H), 5.00 (dt,  $J$  = 10.0, 1.7 Hz, 1H), 3.58 (dd,  $J$  = 10.7, 5.6 Hz, 1H), 3.55 (dd,  $J$  = 10.7, 6.7 Hz, 1H), 3.47 – 3.23 (m, 1H), 3.09 – 3.02 (m, 1H), 2.61 – 2.50 (m, 2H), 2.36 – 2.16 (m, 2H), 2.05 (dtd,  $J$  = 12.4, 9.8, 8.0 Hz, 1H), 1.87 (d,  $J$  = 1.5 Hz, 3H), 1.54 (dddd,  $J$  = 13.1, 8.0, 5.1, 2.0 Hz, 1H).  $^{13}\text{C}$  NMR (101 MHz,  $\text{CDCl}_3$ )  $\delta$  139.0, 137.7, 136.0, 129.0, 128.4, 128.1, 126.4, 116.7, 77.0, 65.4, 56.6, 52.3, 44.3, 26.7, 13.4. **HRMS- $\text{EI}^+$**  ( $m/z$ ): calc for  $\text{C}_{17}\text{H}_{23}\text{NO}$   $[\text{M}]^+$  257.1780, found 257.1788.

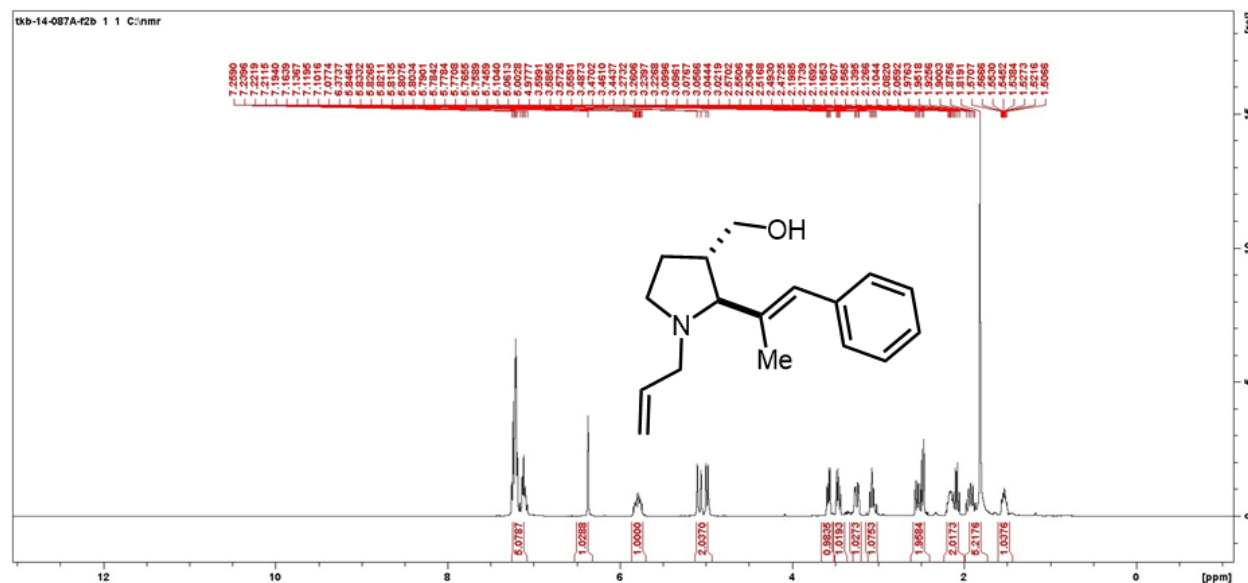

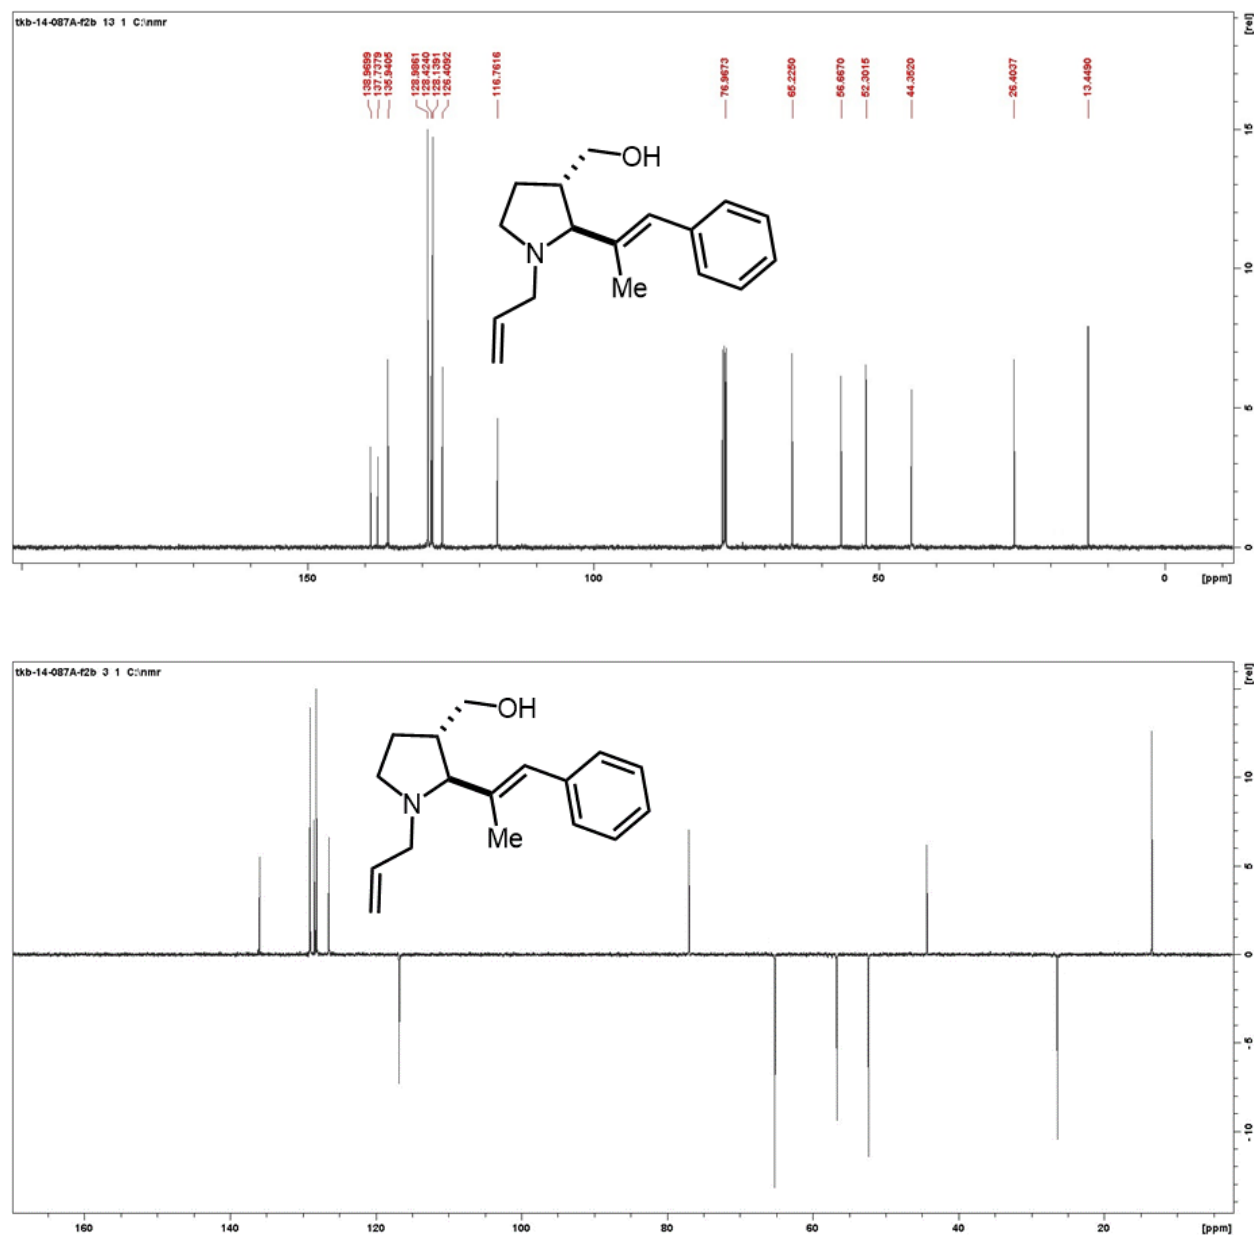

### Compound 6b

Prepared in 2.0 mmol scale using **General Procedures A** and **B**. Purification: Flash chromatography on silica eluting with hexane/acetone (90:10 to 50:50). Yellow oil. Yield = 513.0 mg, 90%, 95:5 dr. <sup>1</sup>H NMR (400 MHz, CDCl<sub>3</sub>) δ 7.37 – 7.21 (m, 5H), 6.49 (s, 1H), 3.72 – 3.53 (m, 2H), 3.11 (ddd, J = 9.7, 8.0, 2.2 Hz, 1H), 2.81 (dd, J = 19.9, 7.5 Hz, 2H), 2.53 – 2.42 (m, 1H), 2.22 (dt, J = 9.9, 6.8, 5.0 Hz, 1H), 2.04 – 1.82 (m, 6H), 1.76 – 1.40 (m, 8H). <sup>13</sup>C NMR (101 MHz, CDCl<sub>3</sub>) δ 141.0, 138.0, 128.9, 128.2, 128.1, 126.8, 126.2, 76.3, 65.4, 64.4, 49.7, 45.3, 31.4, 31.2, 28.2, 26.6, 24.2, 24.1, 23.7, 14.3. **HRMS-EI<sup>+</sup>** (*m/z*): calc for C<sub>19</sub>H<sub>27</sub>NO [M]<sup>+</sup> 285.2093, found 285.2097.

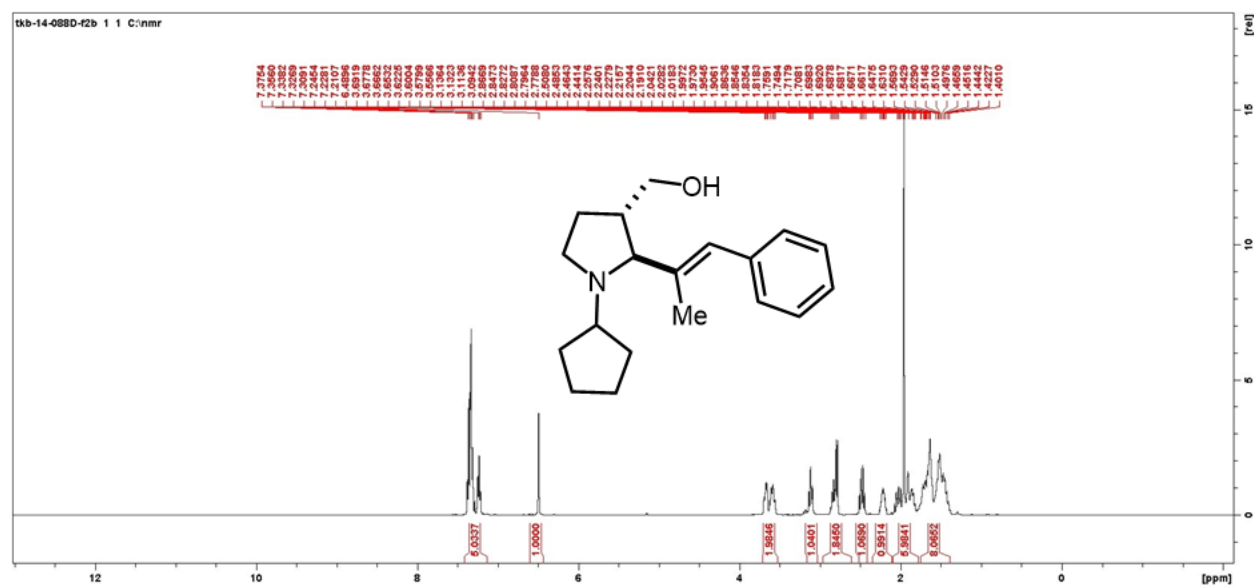

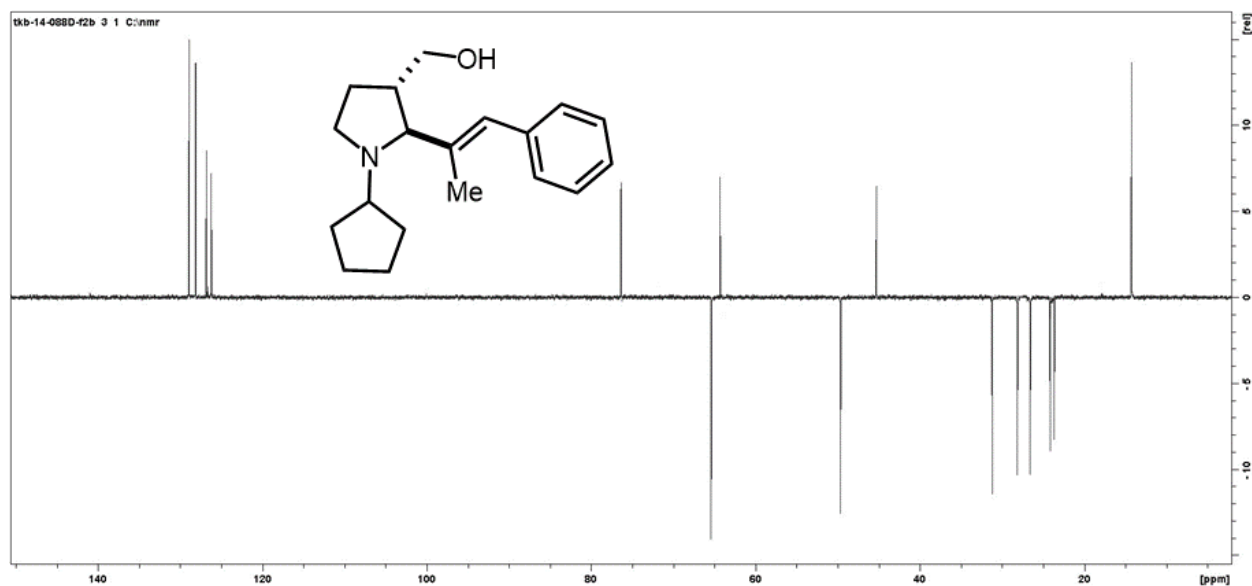

### Compound 6c

Prepared in 2.0 mmol scale using **General Procedures A** and **B**. Purification: Flash chromatography on silica eluting with hexane/acetone (90:10 to 60:40). Pale yellow oil. Yield = 546.5 mg, 85%, 95:5 dr. <sup>1</sup>H NMR (400 MHz, CDCl<sub>3</sub>) δ 7.38 – 7.09 (m, 10H), 6.41 (s, 1H), 3.64 (dd, *J* = 10.6, 5.4 Hz, 1H), 3.53 (dd, *J* = 10.6, 6.8 Hz, 1H), 3.37 – 3.22 (m, 1H), 2.94 – 2.67 (m, 3H), 2.57 (d, *J* = 8.0 Hz, 1H), 2.39 – 2.09 (m, 3H), 2.09 – 1.88 (m, 1H), 1.81 (s, 3H), 1.65 (dddd, *J* = 12.9, 8.0, 5.2, 2.3 Hz, 1H). <sup>13</sup>C NMR (101 MHz, CDCl<sub>3</sub>) δ 140.8, 139.4, 137.8, 129.1, 128.8, 128.3, 128.2, 126.4, 125.9, 77.5, 65.2, 55.8, 52.5, 44.5, 35.1, 26.6, 13.5. **HRMS-EI<sup>+</sup>** (*m/z*): calc for C<sub>22</sub>H<sub>27</sub>NO [M]<sup>+</sup> 321.2093, found 321.2099.

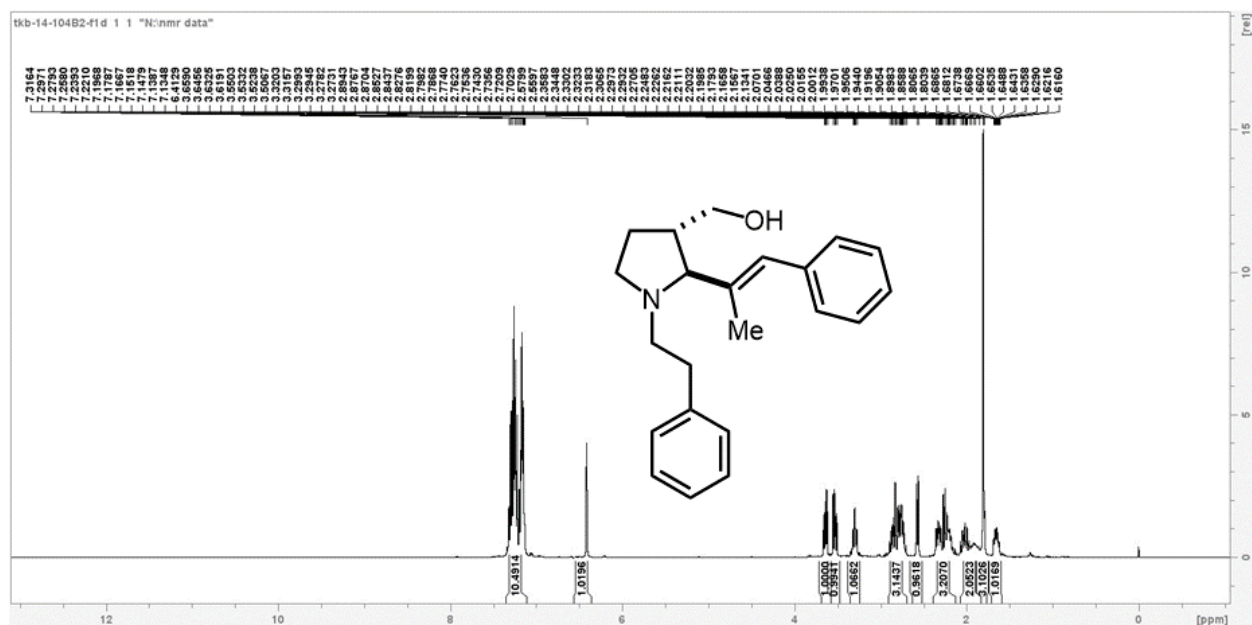

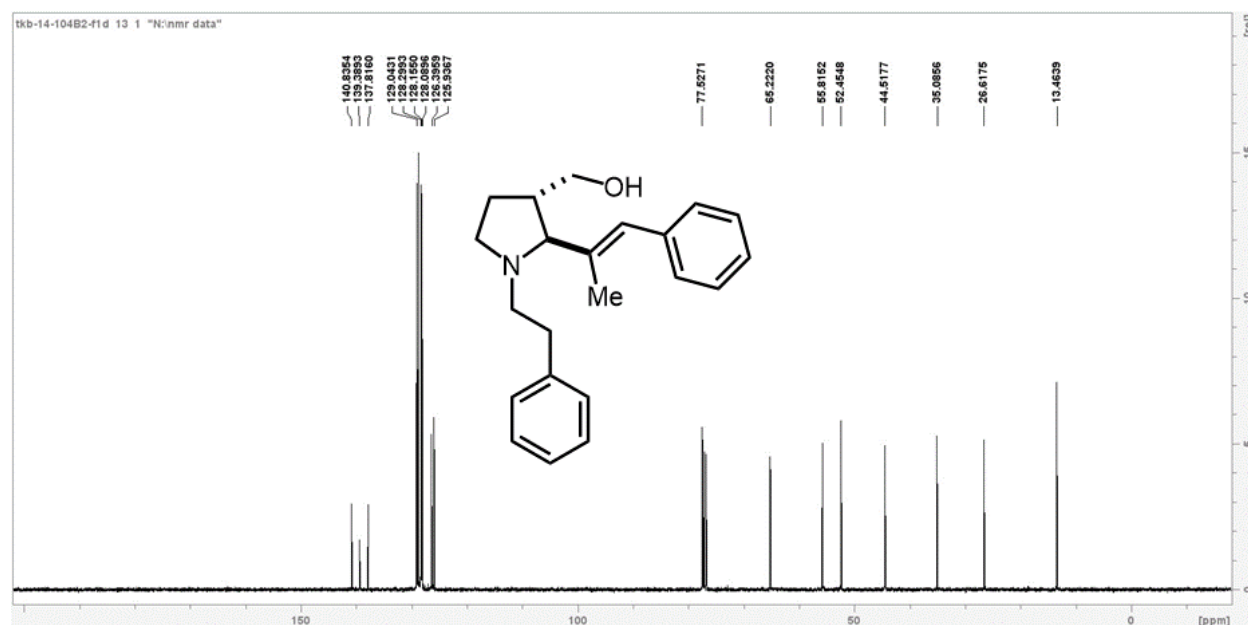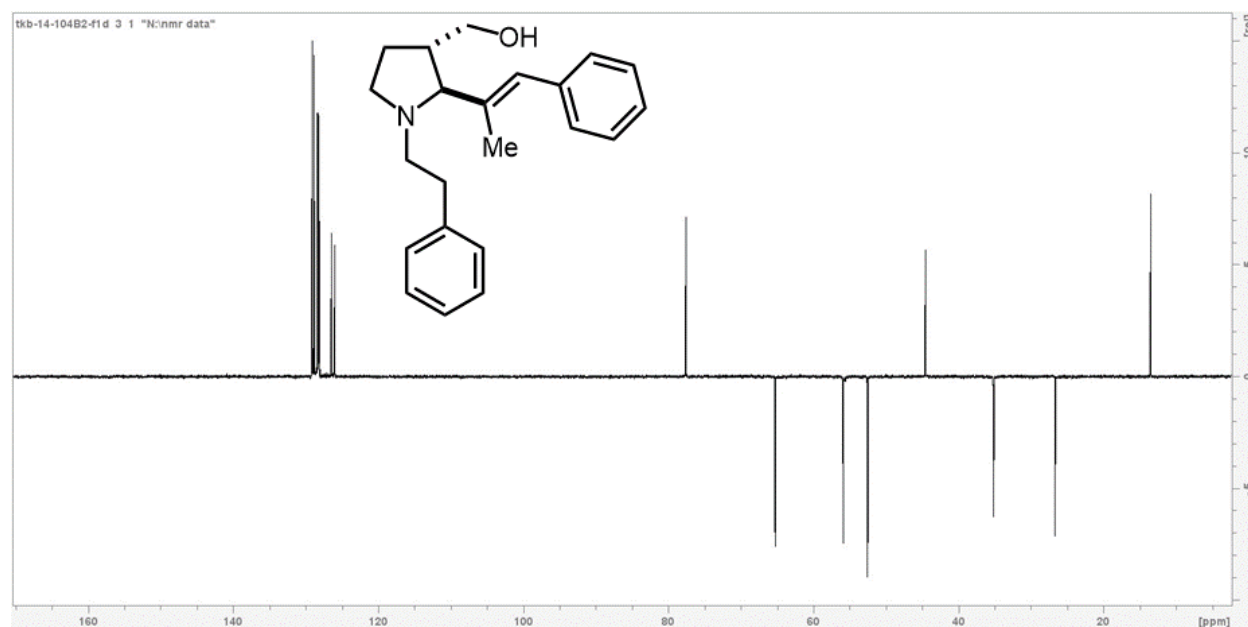

### Compound 6d

Prepared in 2.0 mmol scale using **General Procedures A** and **B**. Purification: Flash chromatography on silica eluting with hexane/acetone (90:10 to 50:50). Pale yellow oil. Yield = 461.7 mg, 89%, 95:5 dr. <sup>1</sup>H NMR (400 MHz, CDCl<sub>3</sub>)  $\delta$  7.36 – 7.25 (m, 4H), 7.24 – 7.14 (m, 1H), 6.47 (s, 1H), 3.66 (dd,  $J = 10.6, 5.7$  Hz, 1H), 3.56 (dd,  $J = 10.6, 6.8$  Hz, 1H), 3.02 – 2.78 (m, 3H), 2.55 (q,  $J = 8.7$  Hz, 1H), 2.26 – 2.13 (m, 1H), 1.98 (dq,  $J = 12.6, 8.8$  Hz, 1H), 1.89 (s, 3H), 1.59



(dddd,  $J = 12.9, 8.1, 5.2, 2.9$  Hz, 1H), 1.09 (d,  $J = 6.8$  Hz, 3H), 0.94 (d,  $J = 6.4$  Hz, 3H).  $^{13}\text{C}$  NMR (101 MHz,  $\text{CDCl}_3$ )  $\delta$  140.5, 137.9, 129.0, 128.1, 127.2, 126.3, 72.8, 65.4, 48.2, 44.8, 44.5, 26.3, 21.9, 14.3, 13.5. **HRMS-EI<sup>+</sup>** ( $m/z$ ): calc for  $\text{C}_{17}\text{H}_{25}\text{NO}$  [ $\text{M}$ ]<sup>+</sup> 259.1936, found 259.1939.

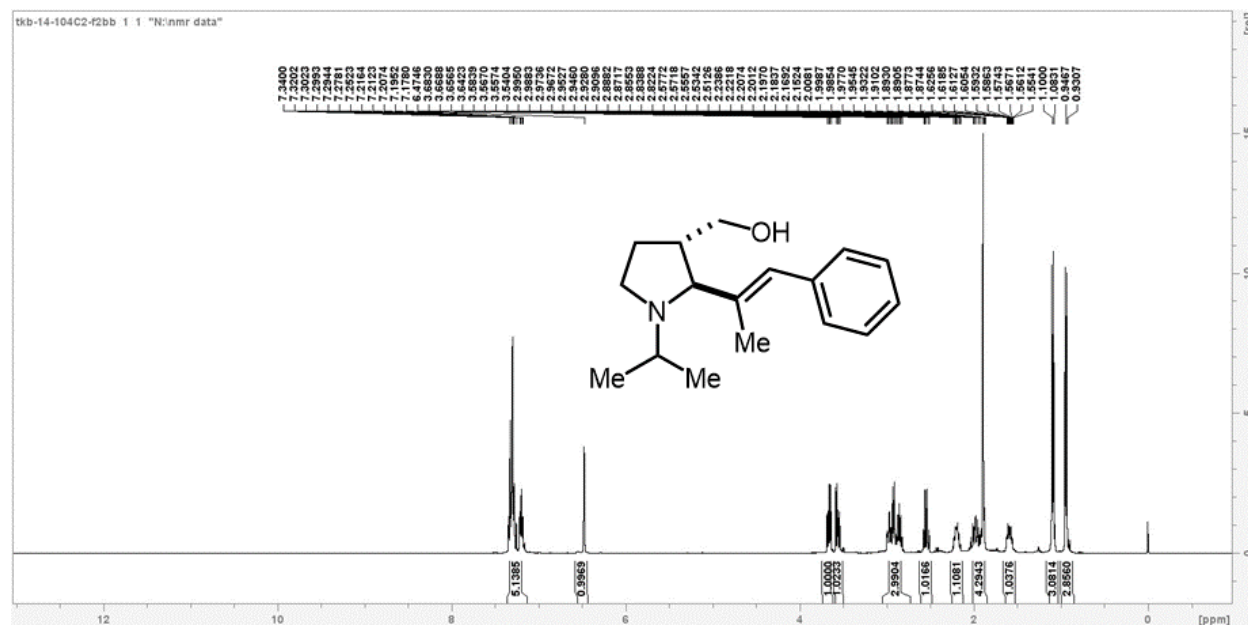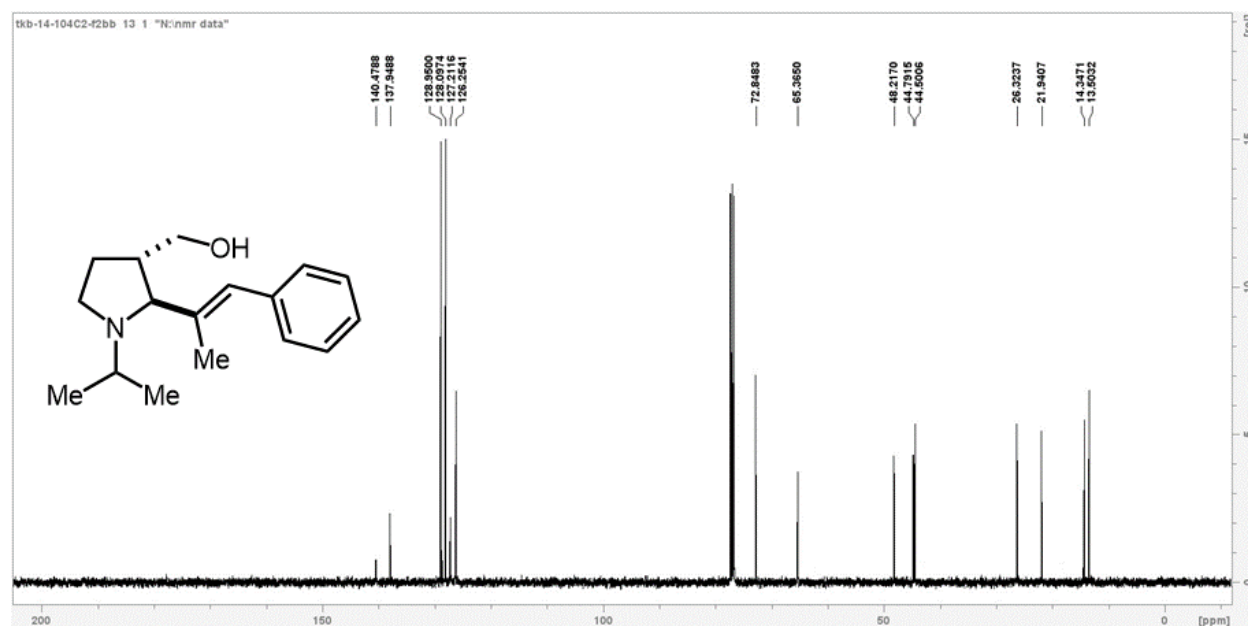

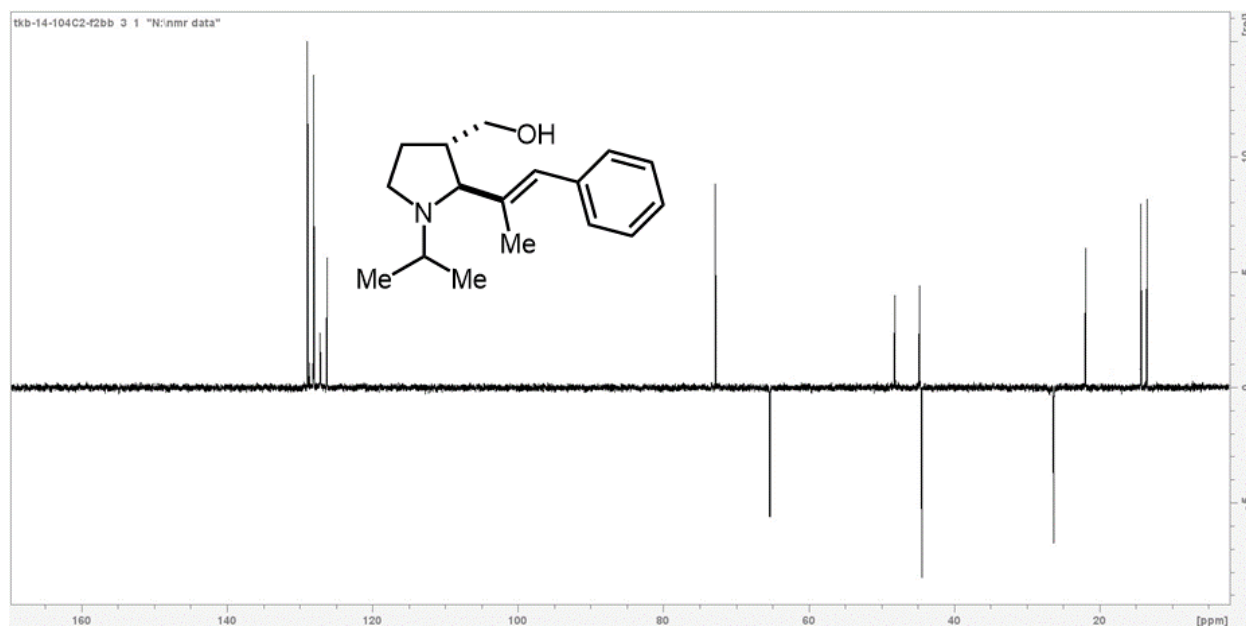

### Compound 6e

Prepared in 2.0 mmol scale using **General Procedures A** and **B**. Purification: Flash chromatography on silica eluting with hexane/acetone (90:10 to 70:30). Pale yellow oil. Yield = 528.7 mg, 86%, 95:5 dr.  $^1\text{H}$  NMR (400 MHz,  $\text{CDCl}_3$ )  $\delta$  7.25 – 7.08 (m, 10H), 6.43 (d,  $J$  = 1.6 Hz, 1H), 3.83 (d,  $J$  = 13.2 Hz, 1H), 3.57 (dd,  $J$  = 10.6, 5.4 Hz, 1H), 3.45 (dd,  $J$  = 10.6, 6.9 Hz, 1H), 2.97 – 2.75 (m, 2H), 2.58 (d,  $J$  = 8.1 Hz, 1H), 2.25 – 2.09 (m, 1H), 2.05 (q,  $J$  = 9.0 Hz, 1H), 1.98 – 1.70 (m, 5H), 1.50 (dddd,  $J$  = 13.0, 7.9, 5.1, 2.2 Hz, 1H).  $^{13}\text{C}$  NMR (101 MHz,  $\text{CDCl}_3$ )  $\delta$  139.8, 139.3, 129.1, 128.8, 128.7, 128.3, 126.9, 126.6, 77.3, 65.4, 58.2, 52.4, 44.5, 26.6, 13.7. **HRMS- $\text{EI}^+$**  ( $m/z$ ): calc for  $\text{C}_{21}\text{H}_{25}\text{NO}$   $[\text{M}]^+$  307.1936, found 307.1939.

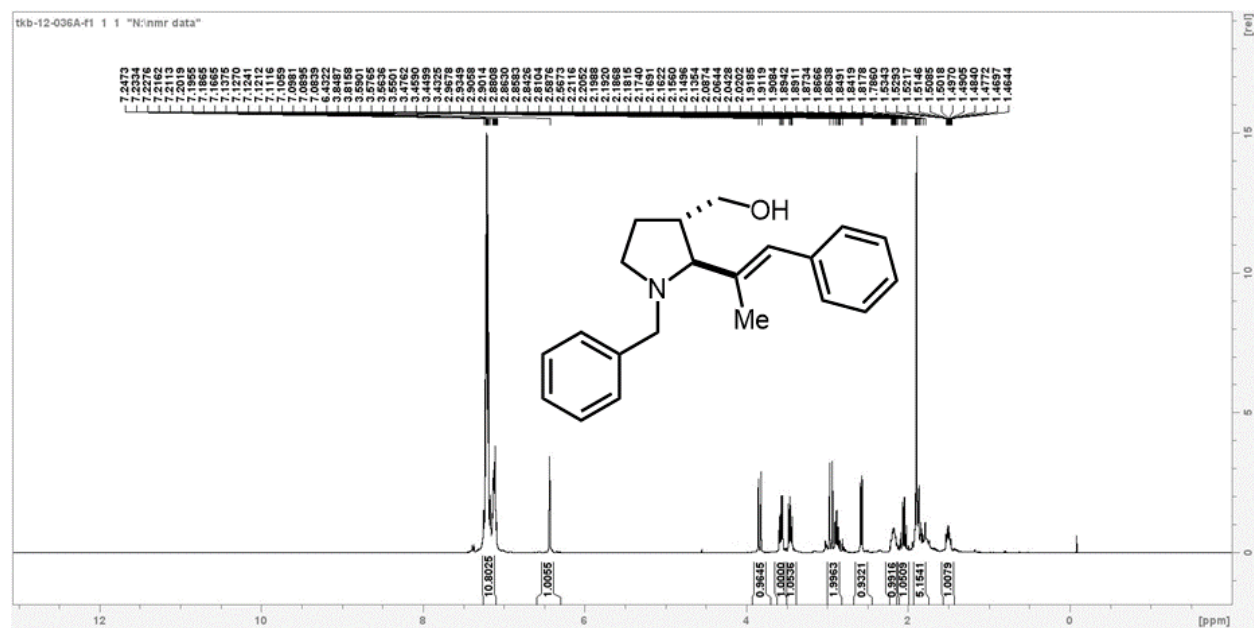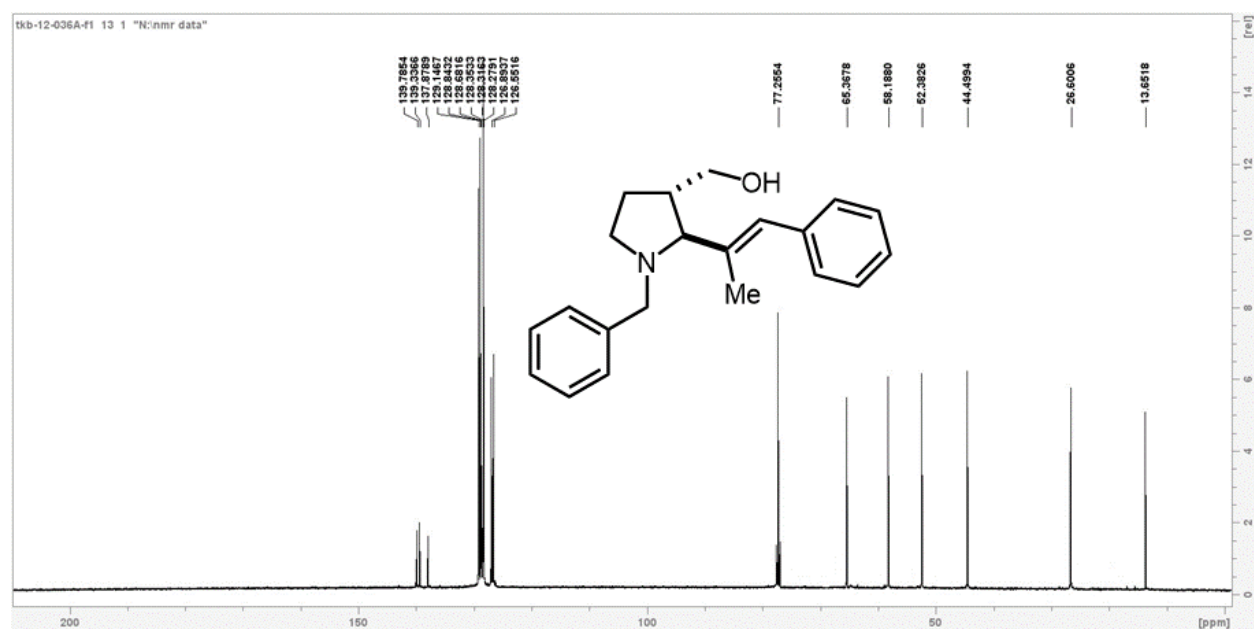

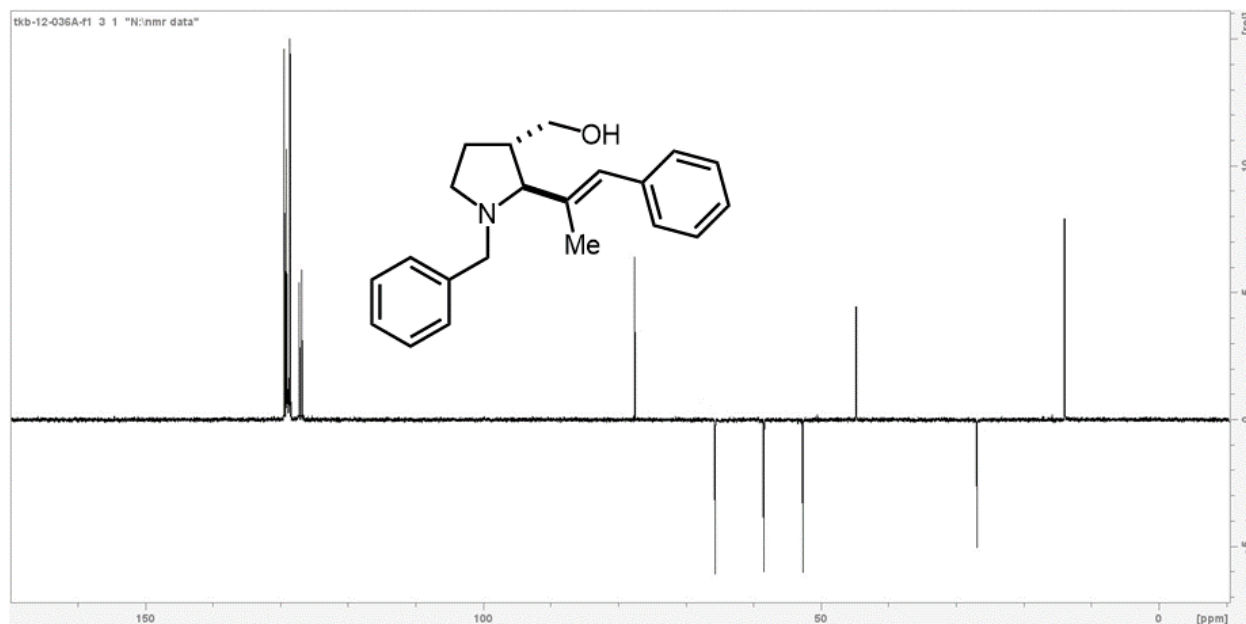

### Compound 6f

Prepared in 2.0 mmol scale using **General Procedures A** and **B**. Purification: Flash chromatography on silica eluting with hexane/acetone (90:10 to 50:50). Pale yellow oil. Yield = 600.7 mg, 89%, 95:5 dr.  $^1\text{H}$  NMR (400 MHz,  $\text{CDCl}_3$ )  $\delta$  7.40 – 7.35 (m, 4H), 7.27 – 7.24 (m, 3H), 6.89 (d,  $J$  = 7.6 Hz, 2H), 6.58 (d,  $J$  = 1.6 Hz, 1H), 3.91 (d,  $J$  = 12.9 Hz, 1H), 3.83 (s, 3H), 3.73 (dd,  $J$  = 10.6, 5.4 Hz, 1H), 3.61 (dd,  $J$  = 10.6, 6.9 Hz, 1H), 3.11 – 2.98 (m, 2H), 2.71 (d,  $J$  = 8.1 Hz, 1H), 2.33 (dddt,  $J$  = 10.3, 8.1, 7.0, 5.3 Hz, 1H), 2.26 – 2.13 (m, 1H), 2.09 – 1.94 (m, 4H), 1.65 (dddd,  $J$  = 12.9, 8.2, 5.0, 2.1 Hz, 1H).  $^{13}\text{C}$  NMR (101 MHz,  $\text{CDCl}_3$ )  $\delta$  158.5, 139.3, 137.9, 131.8, 129.9, 129.0, 128.4, 128.1, 126.4, 113.6, 77.0, 65.1, 57.4, 55.3, 52.2, 44.5, 26.5, 13.6. **HRMS-EI<sup>+</sup>** ( $m/z$ ): calc for  $\text{C}_{22}\text{H}_{27}\text{NO}_2$  [ $\text{M}$ ]<sup>+</sup> 337.2042, found 337.2048.

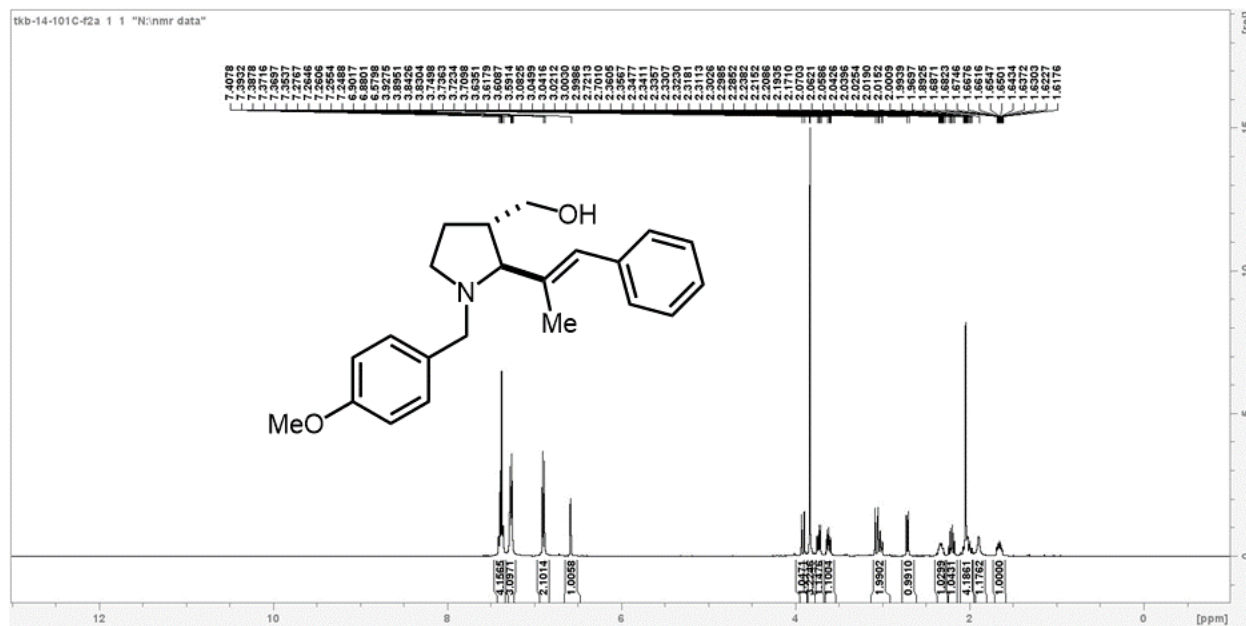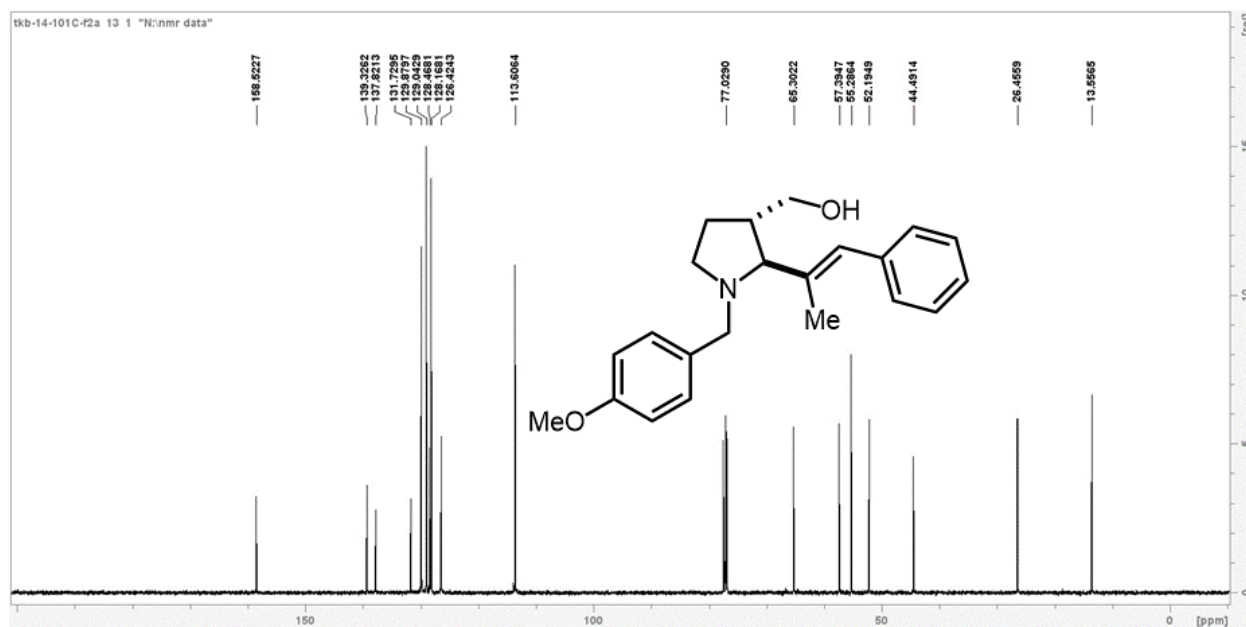

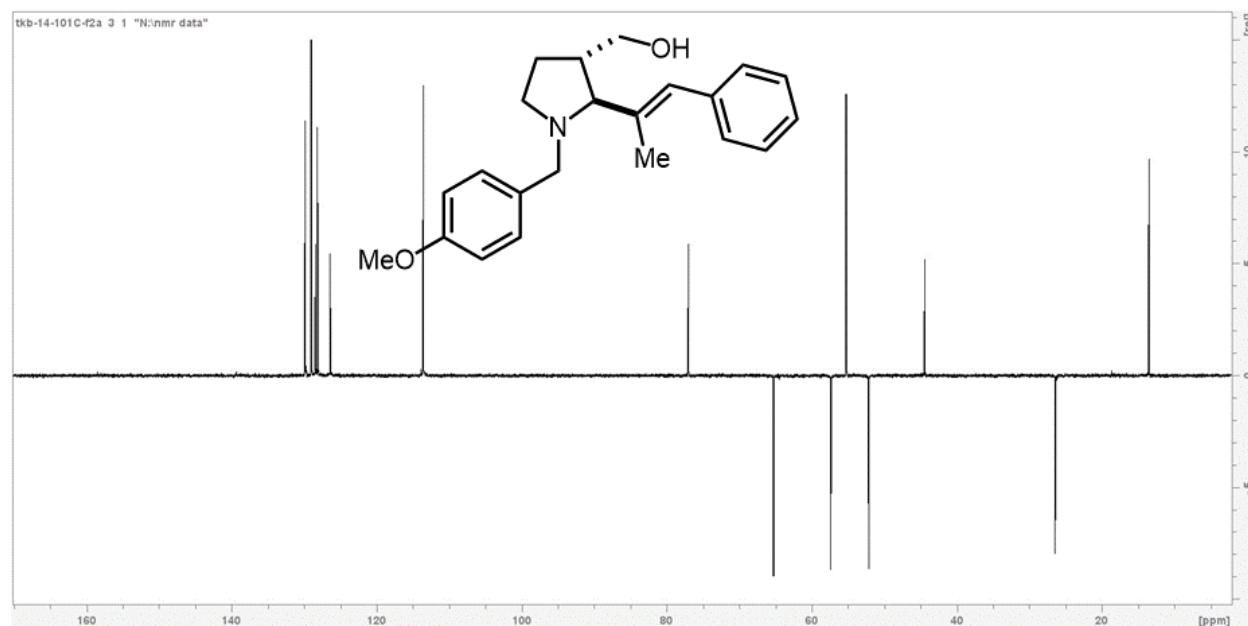

### Compound 6g

Prepared in 2.0 mmol scale using **General Procedures A** and **B**. Purification: Flash chromatography on silica eluting with hexane/acetone (90:10 to 60:40). Pale yellow oil. Yield = 552.9 mg, 86%, 95:5 dr.  $^1\text{H}$  NMR (400 MHz,  $\text{CDCl}_3$ )  $\delta$  7.29 – 7.12 (m, 9H), 6.42 (d,  $J$  = 1.6 Hz, 1H), 3.78 (d,  $J$  = 13.1 Hz, 1H), 3.56 (dd,  $J$  = 10.6, 5.4 Hz, 1H), 3.03 – 2.73 (m, 2H), 2.55 (d,  $J$  = 8.1 Hz, 1H), 2.45 – 2.35 (m, 1H), 2.20 – 2.06 (m, 4H), 2.04 (td,  $J$  = 9.3, 8.2 Hz, 1H), 1.96 – 1.84 (m, 4H), 1.66 (h,  $J$  = 3.9, 3.5 Hz, 1H).  $^{13}\text{C}$  NMR (101 MHz,  $\text{CDCl}_3$ )  $\delta$  139.4, 137.9, 136.7, 136.4, 129.1, 129.0, 128.8, 128.6, 128.3, 126.5, 77.2, 65.3, 57.9, 52.3, 44.6, 26.6, 21.3, 13.7. **HRMS- $\text{EI}^+$**  ( $m/z$ ): calc for  $\text{C}_{22}\text{H}_{27}\text{NO}$   $[\text{M}]^+$  321.2093, found 321.2098.

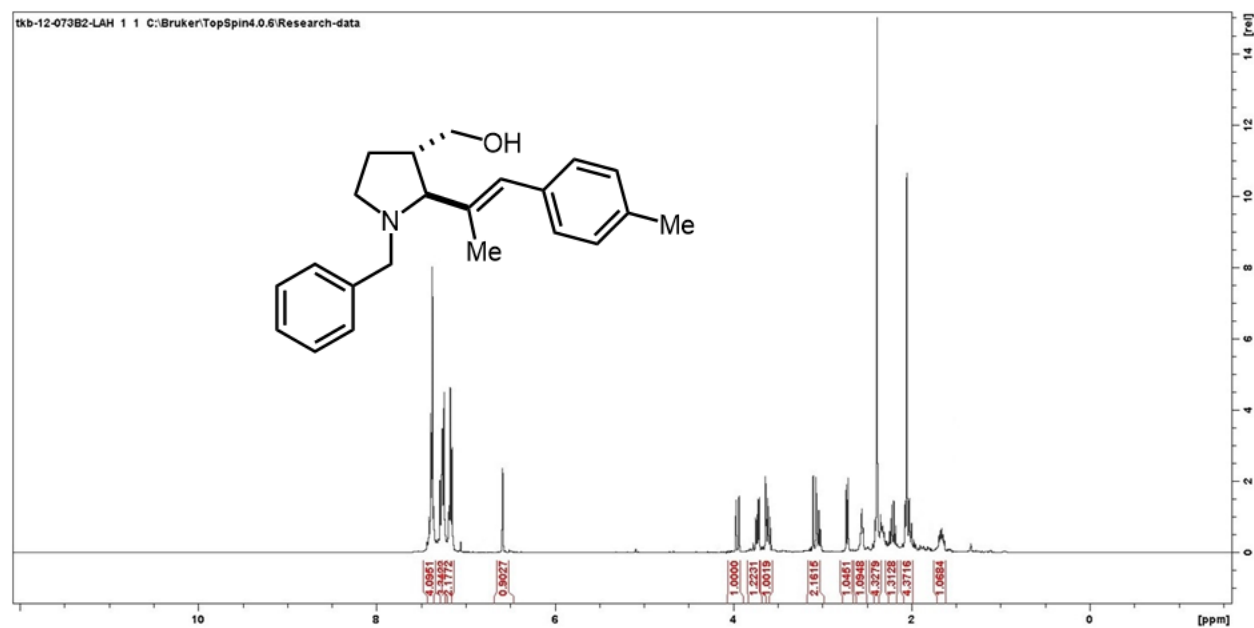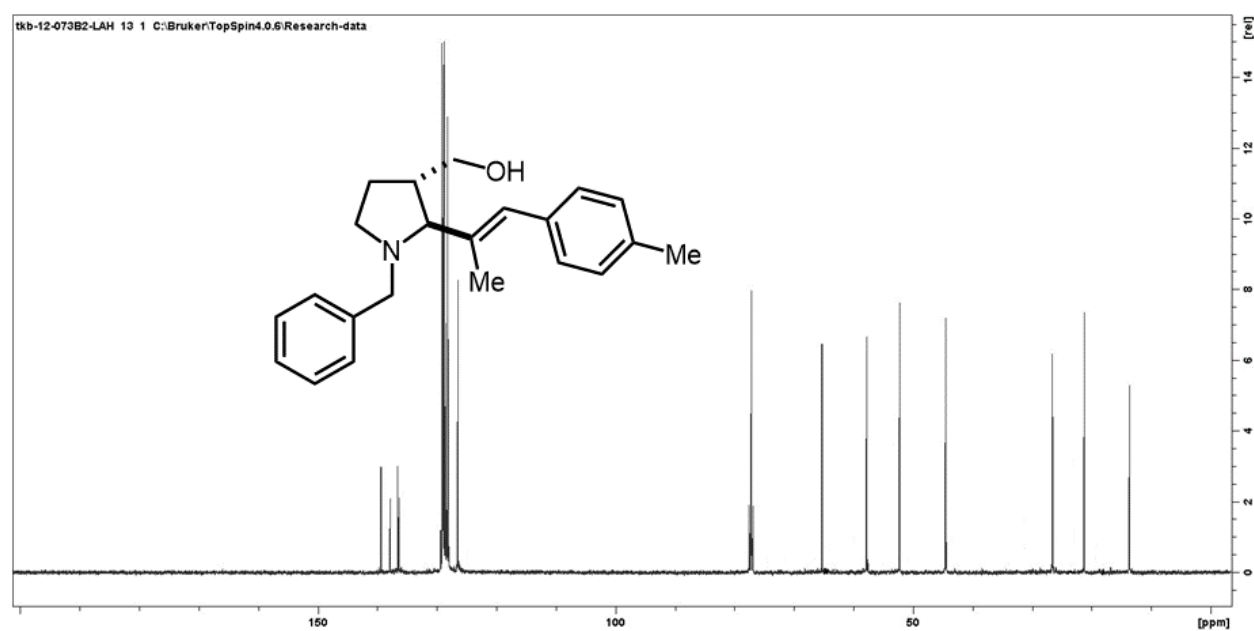

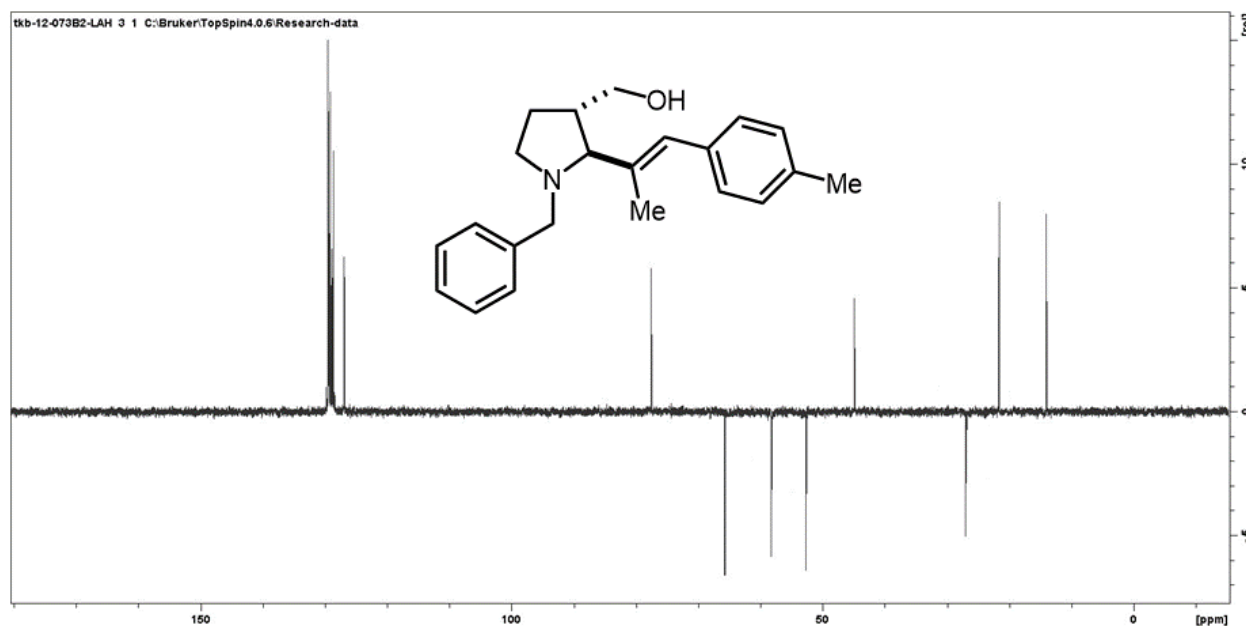

### Compound 6h

Prepared in 2.0 mmol scale using **General Procedures A** and **B**. Purification: Flash chromatography on silica eluting with hexane/acetone (90:10 to 70:30). Greenish-yellow oil. Yield = 567.5 mg, 83%, 95:5 dr. <sup>1</sup>H NMR (400 MHz, CDCl<sub>3</sub>) δ 7.27 – 7.02 (m, 9H), 6.40 (d, *J* = 1.6 Hz, 1H), 3.78 (d, *J* = 13.3 Hz, 1H), 3.56 (dd, *J* = 10.6, 5.5 Hz, 1H), 3.04 – 2.73 (m, 2H), 2.56 (dd, *J* = 8.1, 2.1 Hz, 1H), 2.27 – 2.10 (m, 1H), 2.10 – 1.94 (m, 1H), 1.94 – 1.80 (m, 5H), 1.58 (dddd, *J* = 12.9, 8.3, 5.0, 2.2 Hz, 1H). <sup>13</sup>C NMR (101 MHz, CDCl<sub>3</sub>) δ 139.8, 139.3, 137.8, 130.1, 129.1, 128.8, 128.7, 128.4, 128.3, 128.2, 126.9, 126.5, 77.3, 65.4, 58.1, 52.4, 44.5, 26.6, 13.6. **HRMS-EI<sup>+</sup>** (*m/z*): calc for C<sub>21</sub>H<sub>24</sub>ClNO [*M*]<sup>+</sup> 341.1546, found 341.1552.



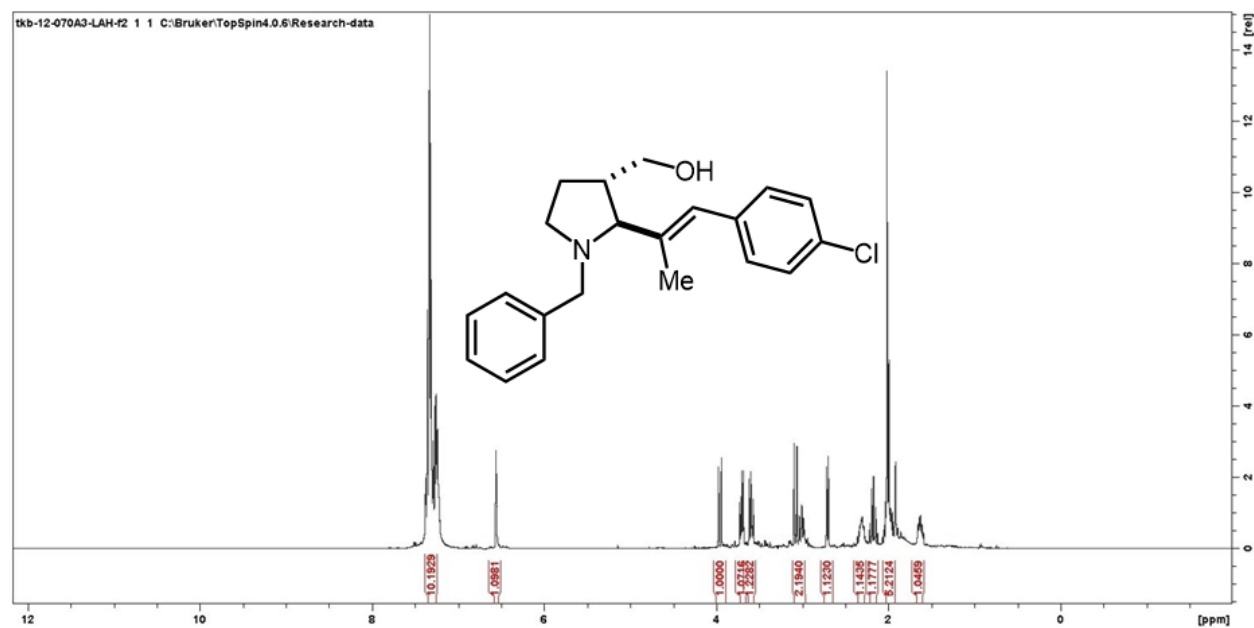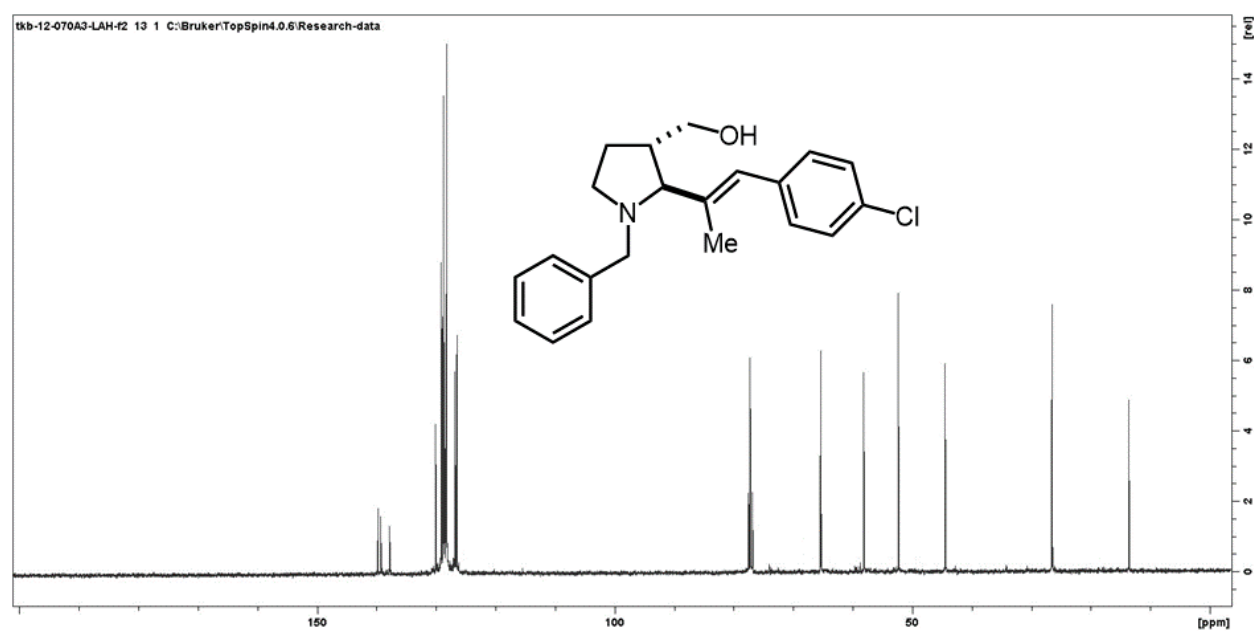

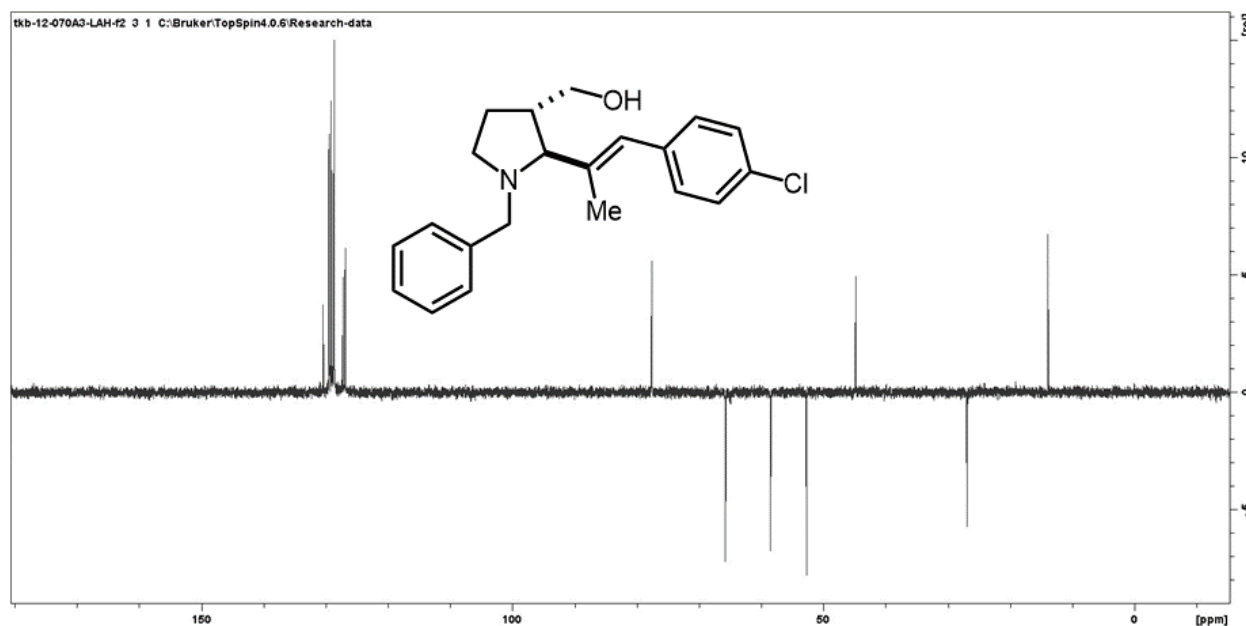

### Compound 6i

Prepared in 2.0 mmol scale using **General Procedures A** and **B**. Purification: Flash chromatography on silica eluting with hexane/acetone (90:10 to 70:30). Greenish-yellow oil. Yield = 559.7 mg, 86%, 95:5 dr. <sup>1</sup>H NMR (400 MHz, CDCl<sub>3</sub>) δ 7.34 – 7.13 (m, 7H), 7.08 – 7.02 (m, 2H), 6.51 (d, *J* = 1.7 Hz, 1H), 3.88 (d, *J* = 12.3 Hz, 1H), 3.72 – 3.54 (m, 3H), 3.02 – 2.88 (m, 2H), 2.65 (d, *J* = 8.1 Hz, 1H), 2.57 (td, *J* = 5.5, 4.3, 2.9 Hz, 1H), 2.34 – 2.20 (m, 1H), 2.13 (q, *J* = 8.9 Hz, 1H), 2.06 – 1.91 (m, 5H), 1.73 – 1.67 (m, 1H). <sup>13</sup>C NMR (101 MHz, CDCl<sub>3</sub>) δ 163.2, 160.7, 139.1, 137.9, 135.6, 135.5, 130.3, 130.2, 129.1, 128.7, 128.3, 126.6, 115.1, 114.9, 77.0, 64.9, 57.5, 54.1, 52.3, 44.6, 23.5, 13.7. **HRMS-EI<sup>+</sup>** (*m/z*): calc for C<sub>21</sub>H<sub>24</sub>FNO [M]<sup>+</sup> 325.1842, found 325.1848.

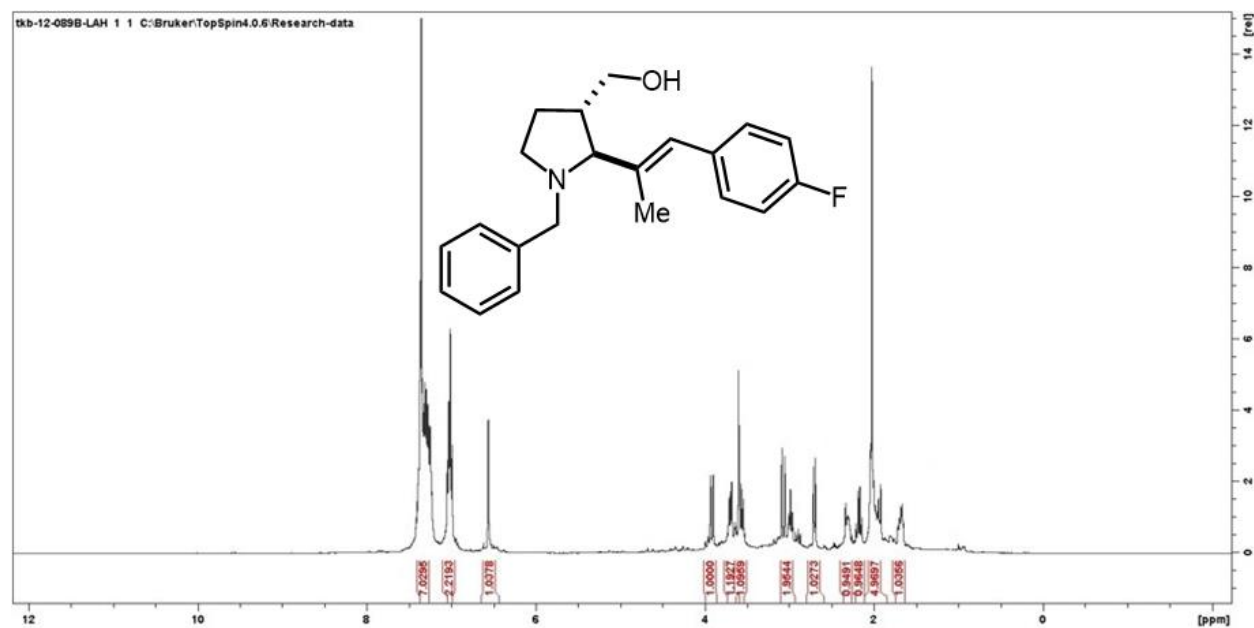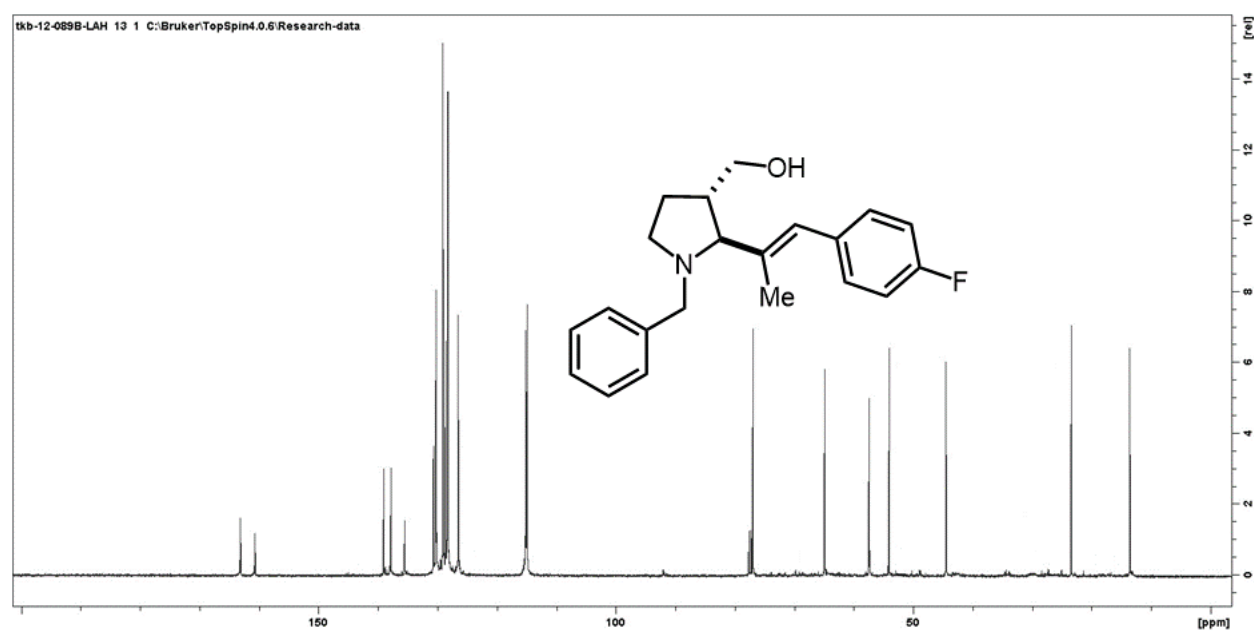

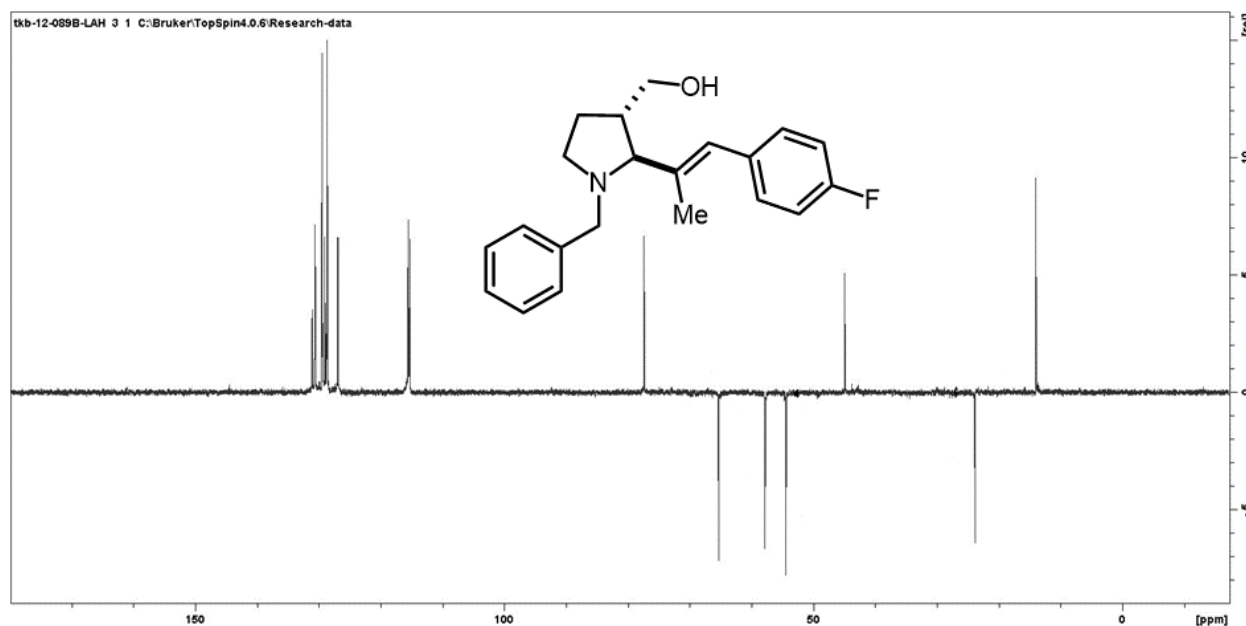

### Compound 6j

Prepared in 2.0 mmol scale using **General Procedures A** and **B**. Purification: Flash chromatography on silica eluting with hexane/acetone (90:10 to 80:20). Amorphous solid. Yield = 593.2 mg, 79%, 95:5 dr. <sup>1</sup>H NMR (400 MHz, CDCl<sub>3</sub>) δ 7.60 (s, 1H), 7.56 – 7.21 (m, 8H), 6.57 (d, *J* = 1.7 Hz, 1H), 4.00 (d, *J* = 13.6 Hz, 1H), 3.74 (dd, *J* = 10.6, 5.5 Hz, 1H), 3.63 (dd, *J* = 10.6, 6.7 Hz, 1H), 3.18 (d, *J* = 13.6 Hz, 1H), 3.01 (td, *J* = 8.5, 2.3 Hz, 1H), 2.76 (d, *J* = 8.1 Hz, 1H), 2.35 (dddt, *J* = 10.2, 8.1, 6.6, 5.3 Hz, 1H), 2.21 (q, *J* = 8.9 Hz, 1H), 2.14 – 1.91 (m, 5H), 1.68 (dddd, *J* = 13.1, 10.6, 6.8, 1.8 Hz, 2H). <sup>13</sup>C NMR (101 MHz, CDCl<sub>3</sub>) δ 140.8, 138.9, 137.6, 131.9, 130.7, 130.4, 129.0, 128.9, 128.8, 128.6, 128.4, 128.2, 128.2, 126.5, 125.7, 125.2, 125.1, 123.7, 123.6, 122.9, 77.0, 65.2, 57.6, 52.4, 44.3, 26.4, 13.5. **HRMS-EI<sup>+</sup>** (*m/z*): calc for C<sub>22</sub>H<sub>24</sub>F<sub>3</sub>NO [M]<sup>+</sup> 375.1810, found 375.1818.

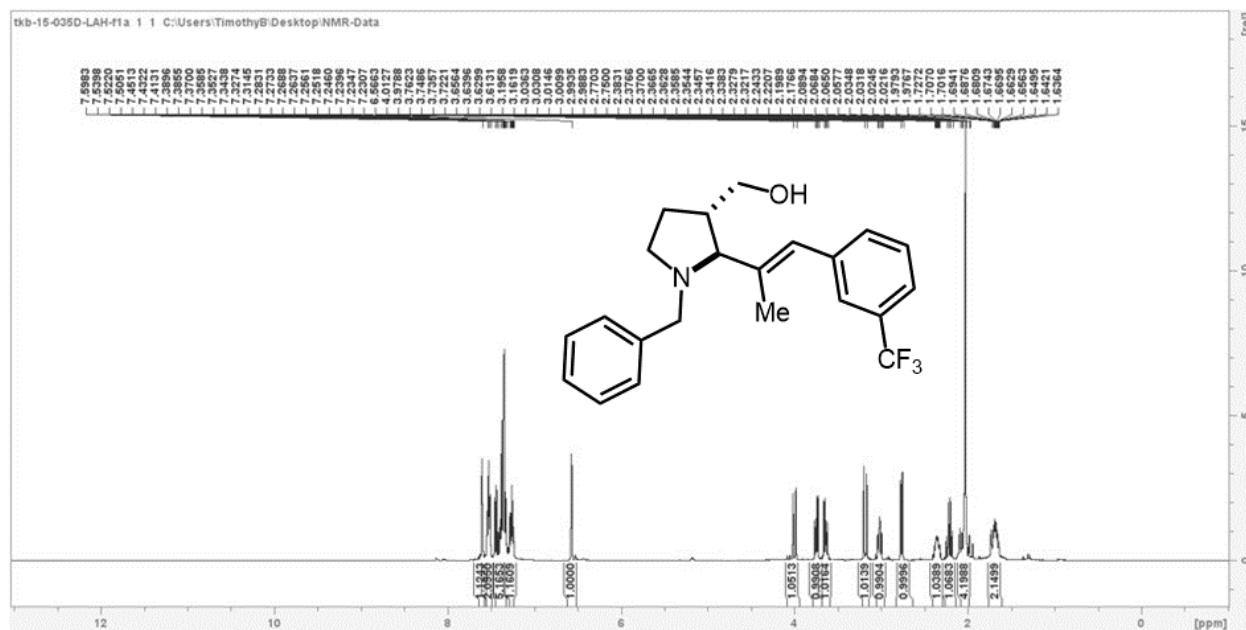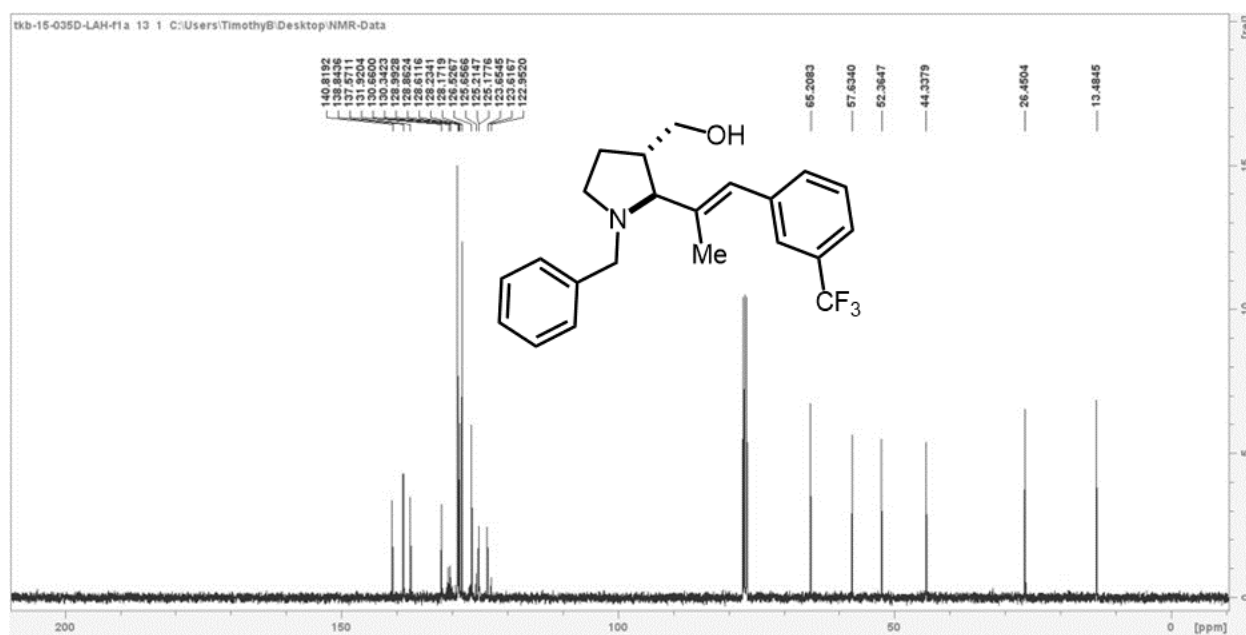

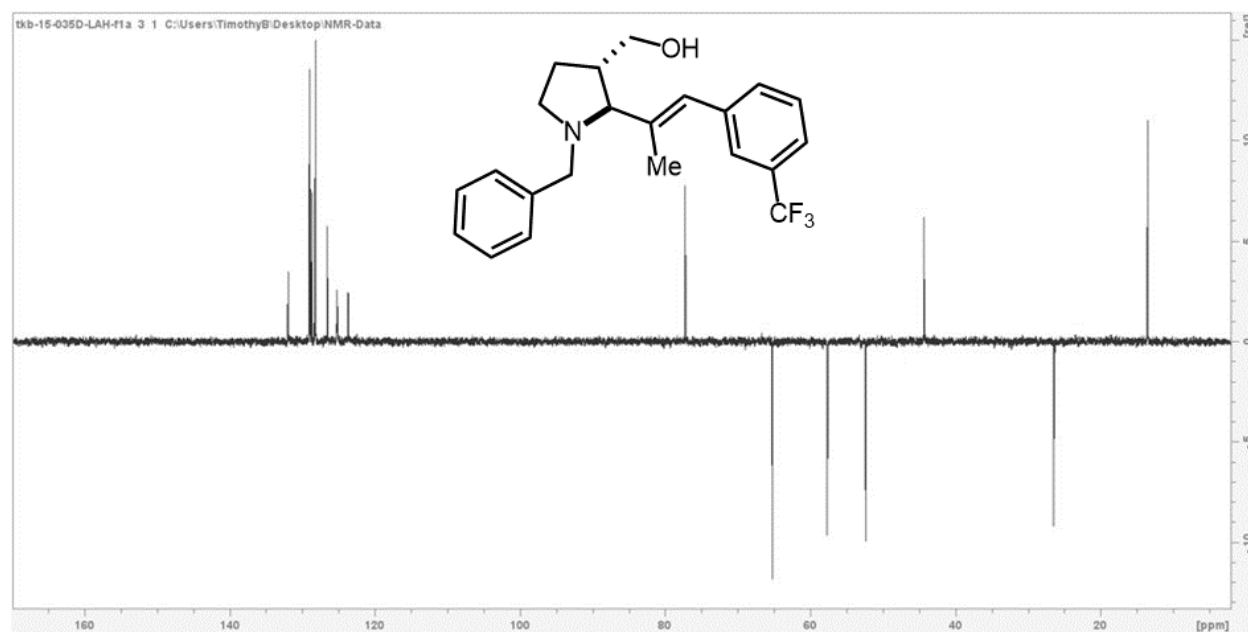

### Compound 6k

Prepared in 2.0 mmol scale using **General Procedures A** and **B**. Purification: Flash chromatography on silica eluting with hexane/acetone (90:10 to 50:50). Amorphous solid. Yield = 452.7 mg, 70%, 95:5 dr. <sup>1</sup>H NMR (400 MHz, CDCl<sub>3</sub>) δ 7.29 (d, *J* = 8.1 Hz, 2H), 7.01 (d, *J* = 8.1 Hz, 2H), 6.89 (d, *J* = 7.6 Hz, 2H), 6.68 (d, *J* = 7.6 Hz, 2H), 6.47 (d, *J* = 15.9 Hz, 1H), 6.11 (dd, *J* = 15.8, 5.9 Hz, 1H), 4.16 (dd, *J* = 5.9, 3.1 Hz, 1H), 3.83 (s, 3H), 3.71 – 3.53 (m, 3H), 3.45 – 3.32 (m, 1H), 2.36 (ddq, *J* = 10.6, 6.9, 3.4 Hz, 1H), 2.28 (s, 3H), 2.29 – 2.17 (m, 1H), 1.91 (ddt, *J* = 12.7, 7.4, 3.7 Hz, 1H). <sup>13</sup>C NMR (101 MHz, CDCl<sub>3</sub>) δ 159.1, 145.5, 129.8, 129.6, 129.3, 127.6, 125.0, 114.0, 112.6, 64.2, 63.3, 55.4, 48.3, 47.6, 25.7, 20.4. **HRMS-EI<sup>+</sup>** (*m/z*): calc for C<sub>21</sub>H<sub>25</sub>NO<sub>2</sub> [M]<sup>+</sup> 323.1885, found 323.1889.

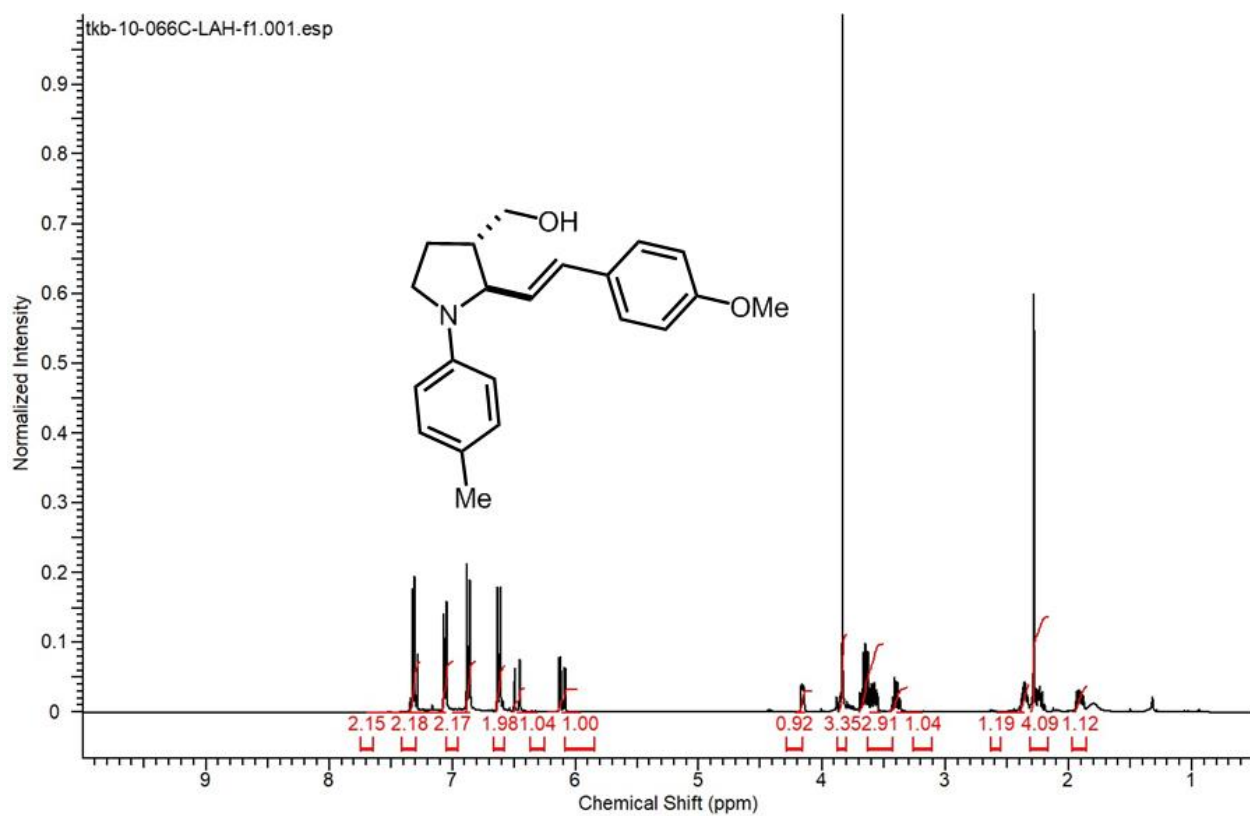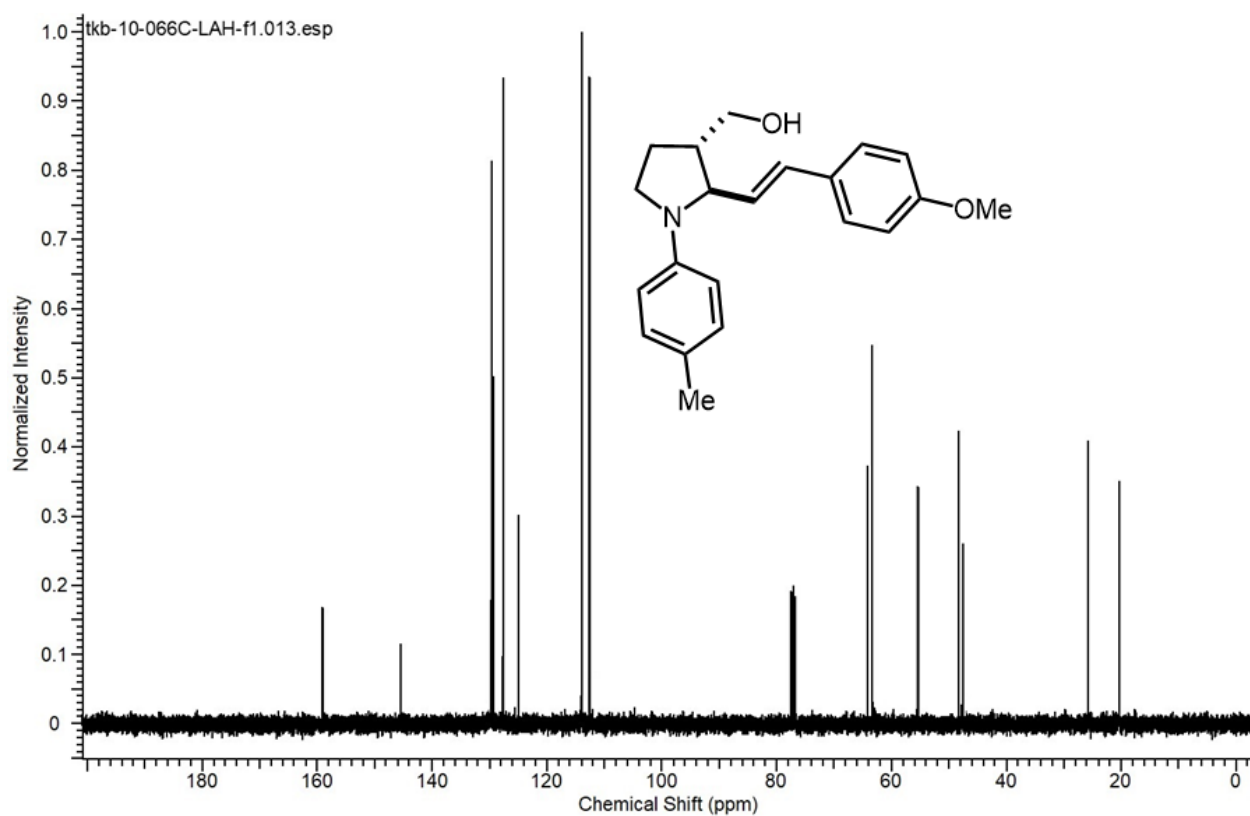

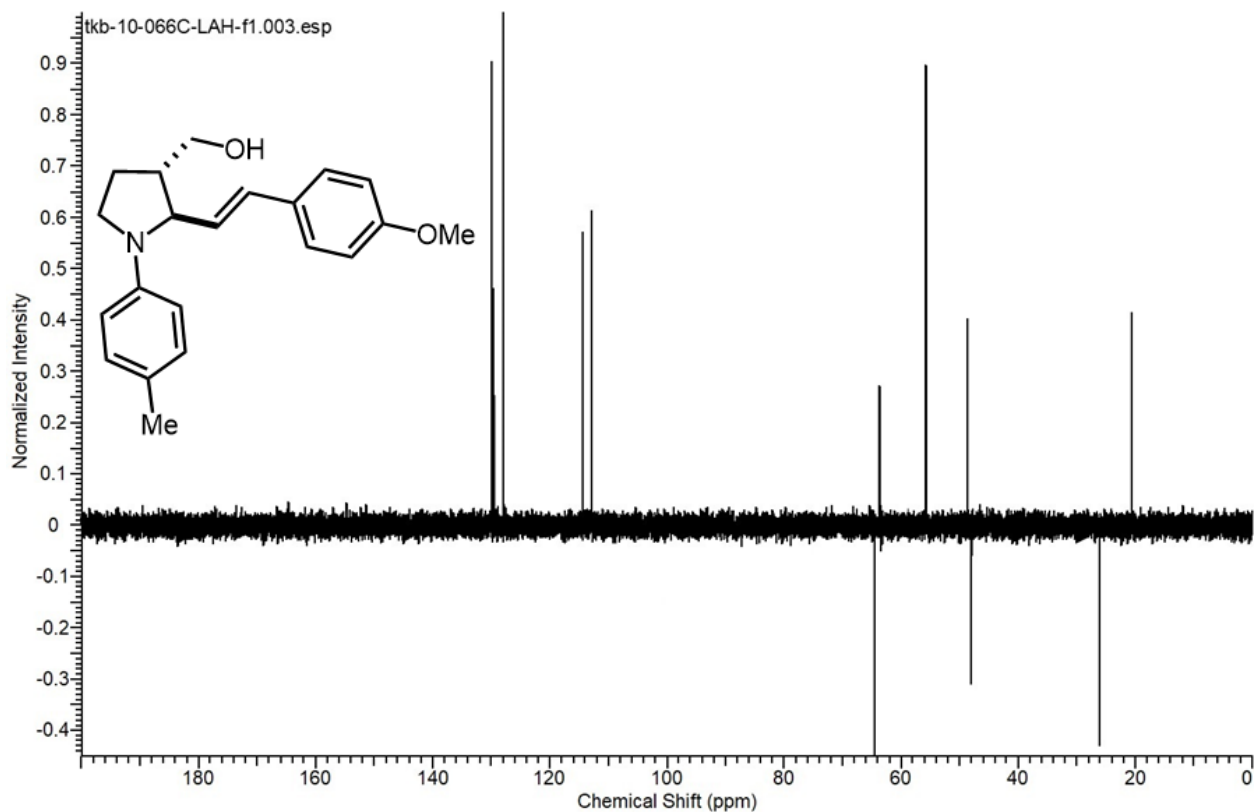

### Compound 6l

Prepared in 2.0 mmol scale using **General Procedures A** and **B**. Purification: Flash chromatography on silica eluting with hexane/acetone (90:10 to 70:30). Yellow oil. Yield = 708.3 mg, 84%, 95:5 dr.  $^1\text{H}$  NMR (400 MHz,  $\text{CDCl}_3$ )  $\delta$  7.39 – 7.09 (m, 6H), 6.76 (dt,  $J$  = 7.5, 1.2 Hz, 1H), 6.71 (qd,  $J$  = 4.1, 1.9 Hz, 2H), 6.41 (s, 1H), 3.75 (s, 3H), 3.73 – 3.62 (m, 1H), 3.55 (dd,  $J$  = 10.6, 7.0 Hz, 1H), 3.33 (td,  $J$  = 8.4, 2.2 Hz, 1H), 2.92 (ddd,  $J$  = 11.7, 10.1, 6.6 Hz, 1H), 2.84 – 2.65 (m, 2H), 2.56 (d,  $J$  = 7.6 Hz, 1H), 2.34 – 2.09 (m, 5H), 2.04 (dtd,  $J$  = 12.5, 9.6, 7.9 Hz, 1H), 1.67 (dddd,  $J$  = 14.8, 7.6, 4.6, 2.1 Hz, 1H), 1.52 – 1.37 (m, 1H), 1.37 – 1.16 (m, 6H), 0.87 (t,  $J$  = 6.9 Hz, 3H).  $^{13}\text{C}$  NMR (101 MHz,  $\text{CDCl}_3$ )  $\delta$  159.6, 144.0, 142.4, 137.9, 129.2, 128.6, 128.2, 128.0, 126.3, 121.2, 114.6, 111.2, 65.4, 56.1, 55.1, 52.4, 45.8, 35.4, 31.5, 29.9, 29.2, 28.5, 26.6, 22.6, 14.1. **HRMS-EI<sup>+</sup>** ( $m/z$ ): calc for  $\text{C}_{28}\text{H}_{39}\text{NO}_2$   $[\text{M}]^+$  421.2981, found 421.2987.



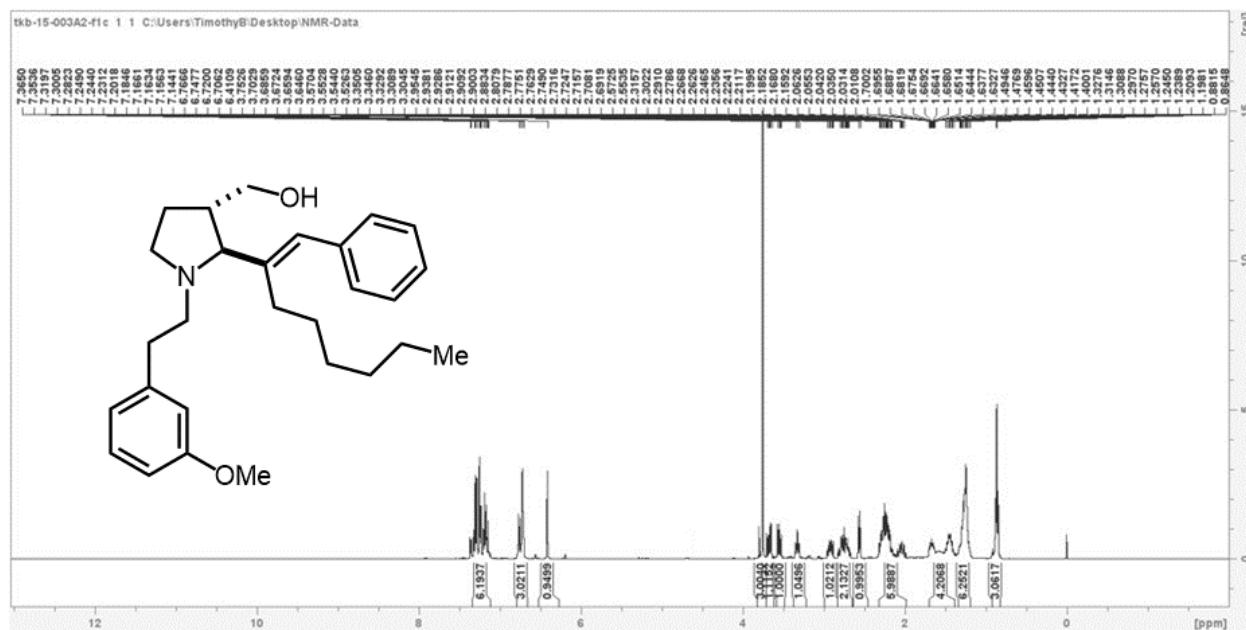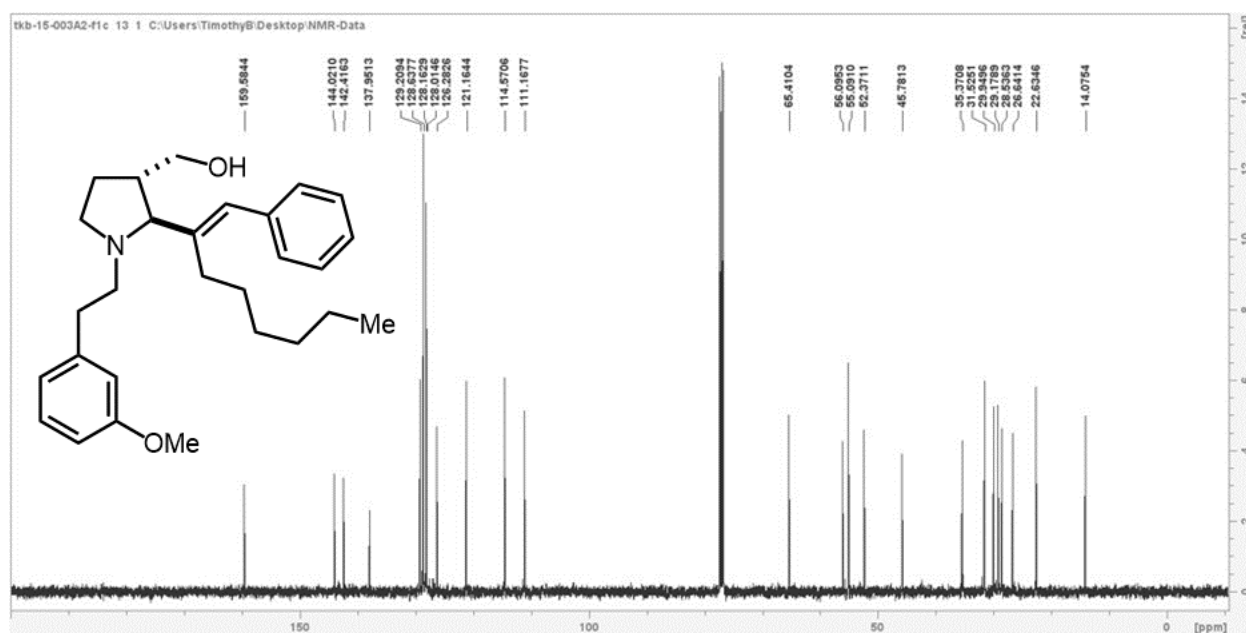

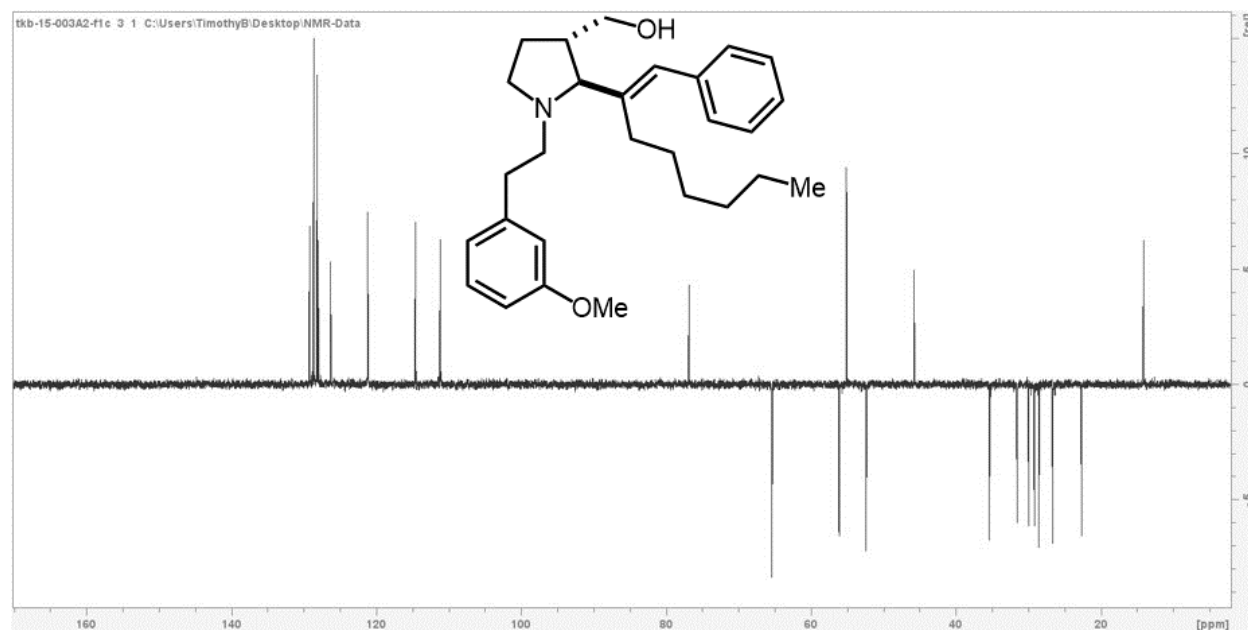

### Compound 6m

Prepared in 2.0 mmol scale using **General Procedures A** and **B**. Purification: Flash chromatography on silica eluting with hexane/acetone (90:10 to 50:50). Greenish-yellow oil. Yield = 484.7 mg, 88%, 95:5 dr.  $^1\text{H}$  NMR (400 MHz,  $\text{CDCl}_3$ )  $\delta$  7.31 (d,  $J = 7.8$  Hz, 2H), 6.85 (d,  $J = 15.8$  Hz, 2H), 6.45 (d,  $J = 15.8$  Hz, 1H), 6.03 (dd,  $J = 15.8, 8.9$  Hz, 1H), 3.81 (s, 3H), 3.72 – 3.60 (m, 2H), 3.21 (dd,  $J = 8.9, 5.5$  Hz, 1H), 2.99 – 2.81 (m, 2H), 2.75 (td,  $J = 9.0, 6.4$  Hz, 1H), 2.22 – 2.02 (m, 2H), 1.70 (ddd,  $J = 12.5, 8.9, 4.6$  Hz, 1H), 1.11 (d,  $J = 6.6$  Hz, 3H), 0.99 (d,  $J = 6.3$  Hz, 3H).  $^{13}\text{C}$  NMR (101 MHz,  $\text{CDCl}_3$ )  $\delta$  159.2, 131.2, 129.7, 128.4, 127.5, 114.0, 67.1, 65.8, 55.3, 48.6, 46.3, 45.6, 26.0, 22.3, 16.4. **HRMS-EI<sup>+</sup>** ( $m/z$ ): calc for  $\text{C}_{17}\text{H}_{25}\text{NO}_2$   $[\text{M}]^+$  275.1885, found 275.1888.

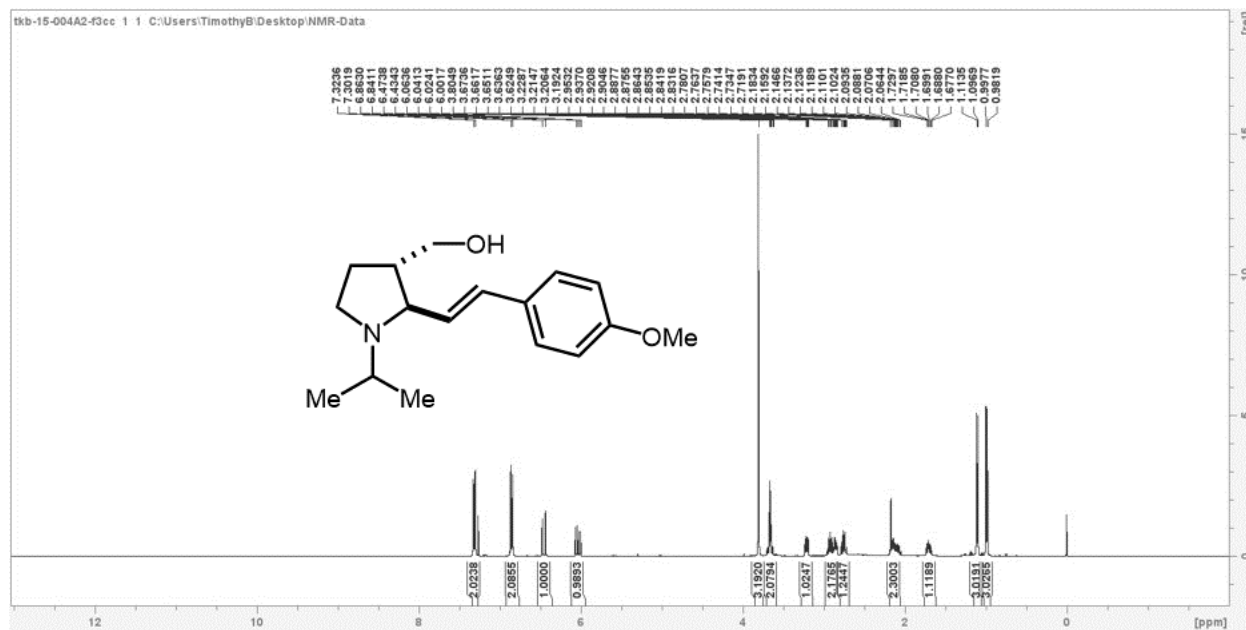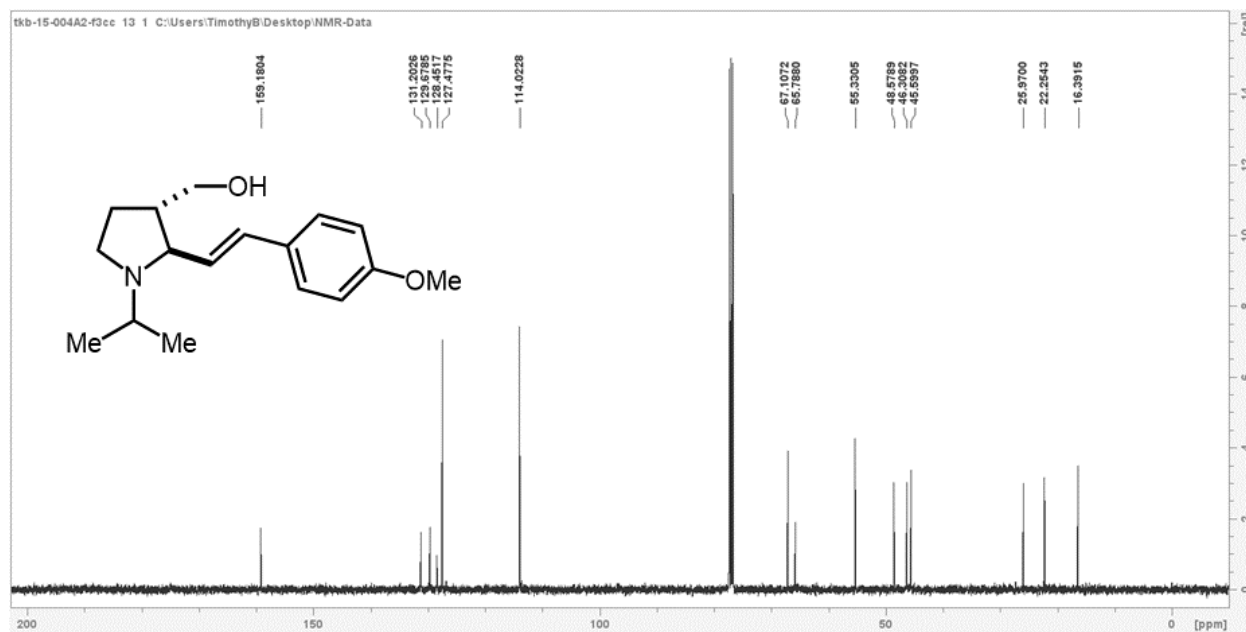

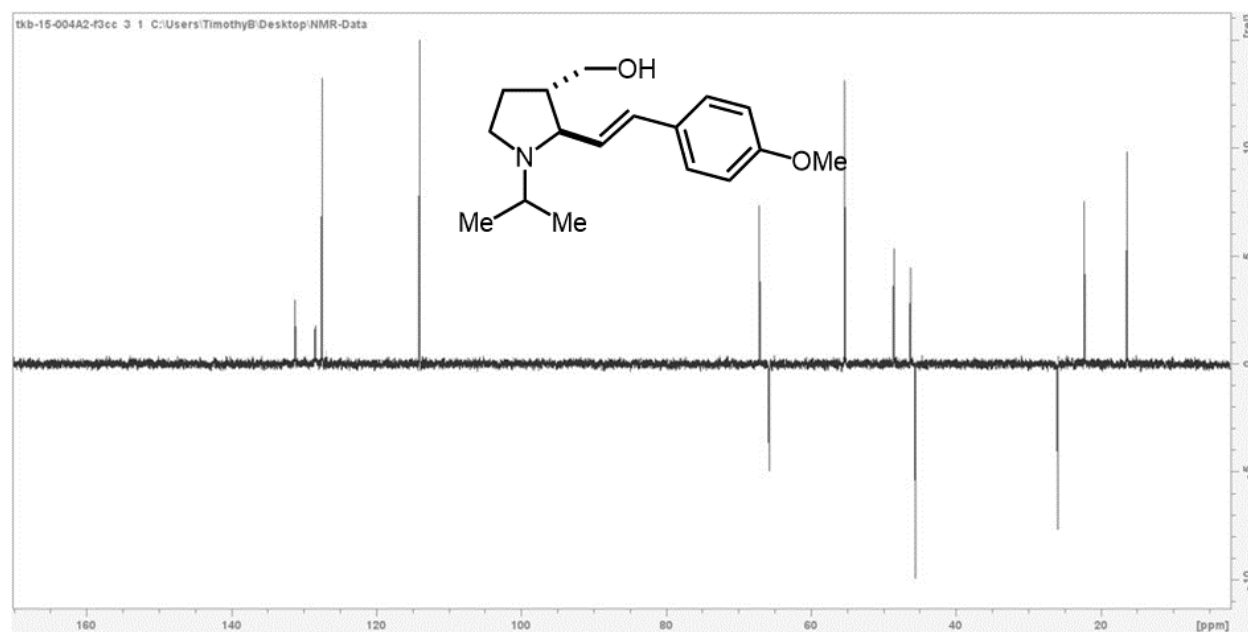

### Compound 6n

Prepared in 2.0 mmol scale using **General Procedures A** and **B**. Purification: Flash chromatography on silica eluting with hexane/acetone (90:10 to 50:50). Greenish-yellow oil. Yield = 510.3 mg, 83%, 95:5 dr.  $^1\text{H}$  NMR (400 MHz,  $\text{CDCl}_3$ )  $\delta$  7.36 – 7.13 (m, 10H), 6.50 (d,  $J$  = 15.8 Hz, 1H), 6.17 (dd,  $J$  = 15.8, 8.8 Hz, 1H), 3.65 (dd,  $J$  = 10.6, 4.7 Hz, 1H), 3.57 (dd,  $J$  = 10.6, 5.8 Hz, 1H), 3.51 – 3.31 (m, 1H), 3.26 (td,  $J$  = 8.7, 3.0 Hz, 1H), 3.18 – 2.90 (m, 2H), 2.89 – 2.66 (m, 3H), 2.44 – 2.03 (m, 4H), 1.80 – 1.68 (m, 1H).  $^{13}\text{C}$  NMR (101 MHz,  $\text{CDCl}_3$ )  $\delta$  140.3, 136.7, 132.9, 128.7, 128.6, 128.4, 127.7, 126.5, 126.1, 71.3, 64.6, 64.5, 55.8, 52.6, 46.7, 35.1, 26.2. **HRMS-EI<sup>+</sup>** ( $m/z$ ): calc for  $\text{C}_{21}\text{H}_{25}\text{NO}$   $[\text{M}]^+$  307.1936, found 307.1942.

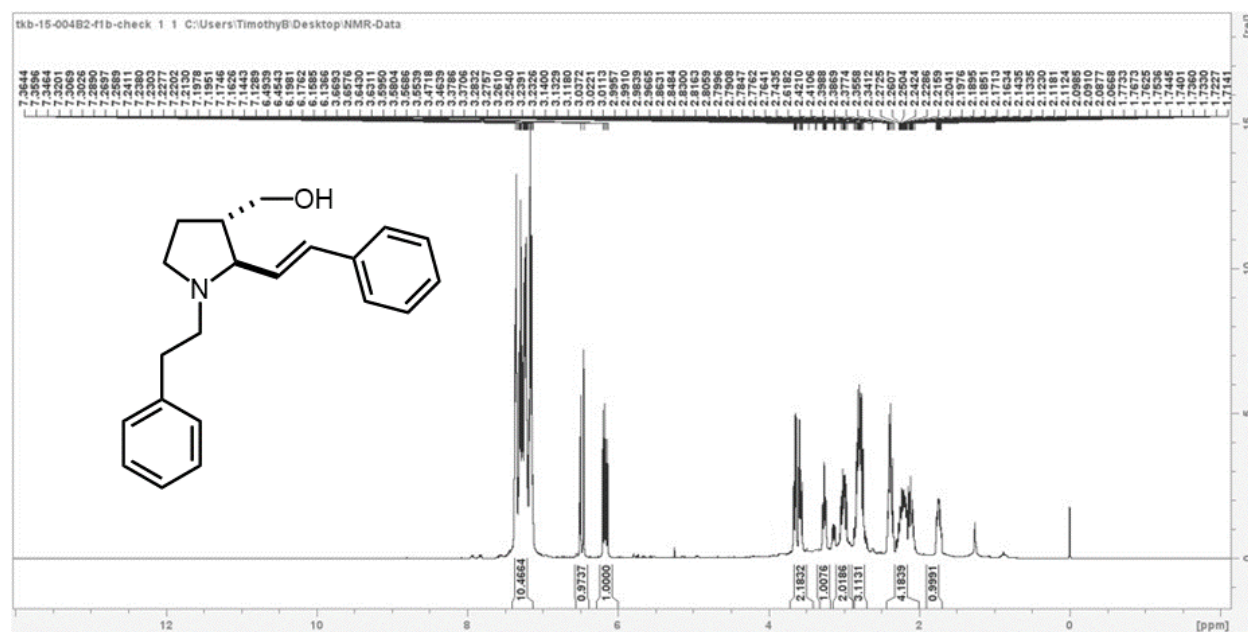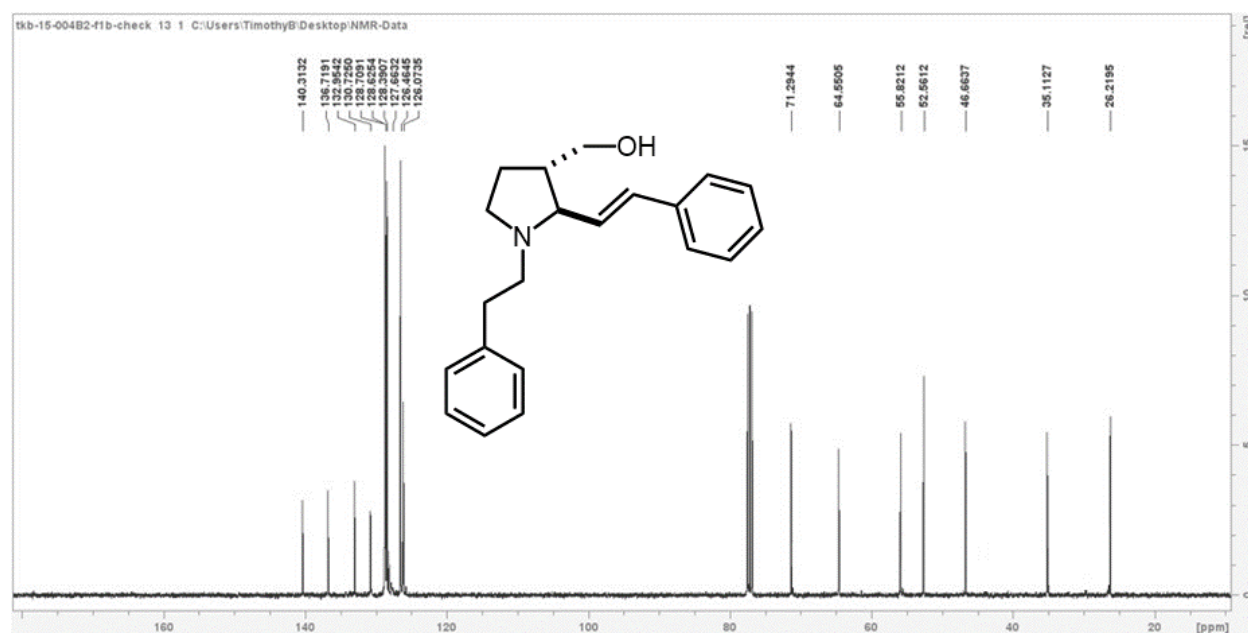

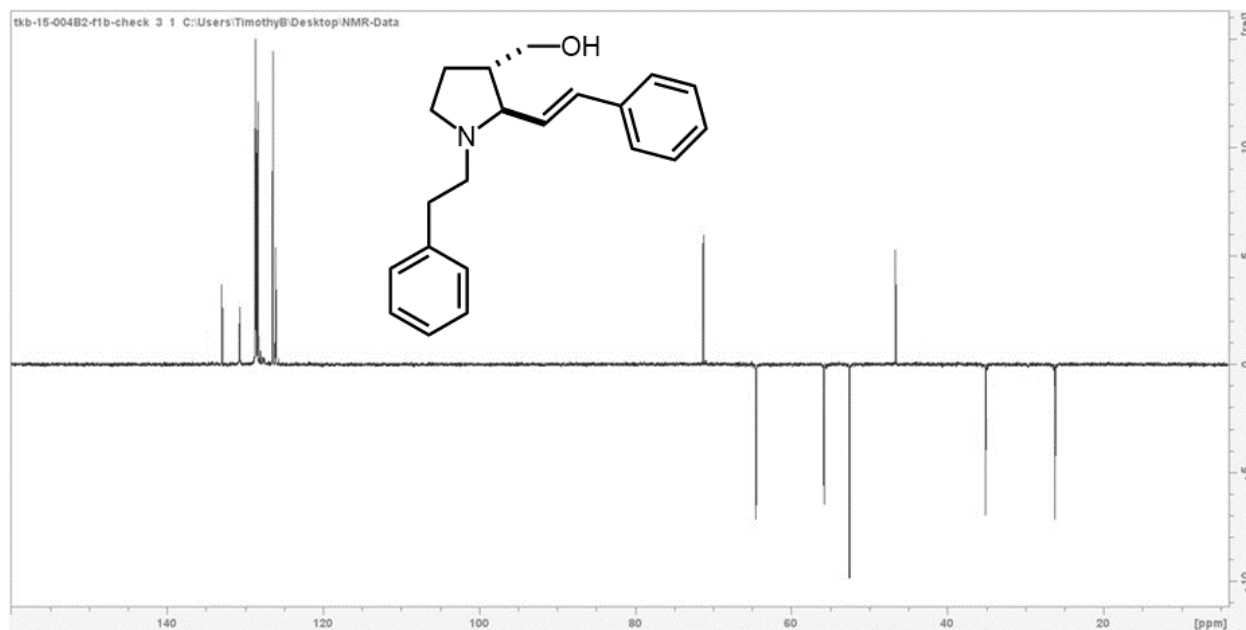

### Compound 60

Prepared in 2.0 mmol scale using **General Procedures A** and **B**. Purification: Flash chromatography on silica eluting with hexane/acetone (90:10 to 70:30). Greenish-yellow oil. Yield = 540.2 mg, 79%, 95:5 dr. <sup>1</sup>H NMR (400 MHz, CDCl<sub>3</sub>) δ 7.41 – 7.11 (m, 9H), 6.49 (d, *J* = 15.8 Hz, 1H), 6.17 (dd, *J* = 15.8, 8.8 Hz, 1H), 3.90 – 3.80 (m, 1H), 3.74 – 3.62 (m, 3H), 3.65 – 3.49 (m, 1H), 3.26 (td, *J* = 8.8, 3.1 Hz, 1H), 3.00 (ddd, *J* = 11.7, 10.3, 6.4 Hz, 1H), 2.90 – 2.70 (m, 4H), 2.39 – 2.19 (m, 2H), 2.21 – 2.07 (m, 2H). <sup>13</sup>C NMR (101 MHz, CDCl<sub>3</sub>) δ 140.3, 136.7, 132.9, 128.7, 128.6, 128.3, 127.6, 126.4, 126.0, 71.3, 62.8, 55.7, 52.5, 46.6, 29.9, 26.2. **HRMS-EI<sup>+</sup>** (*m/z*): calc for C<sub>21</sub>H<sub>24</sub>ClNO [M]<sup>+</sup> 341.1546, found 341.1542.

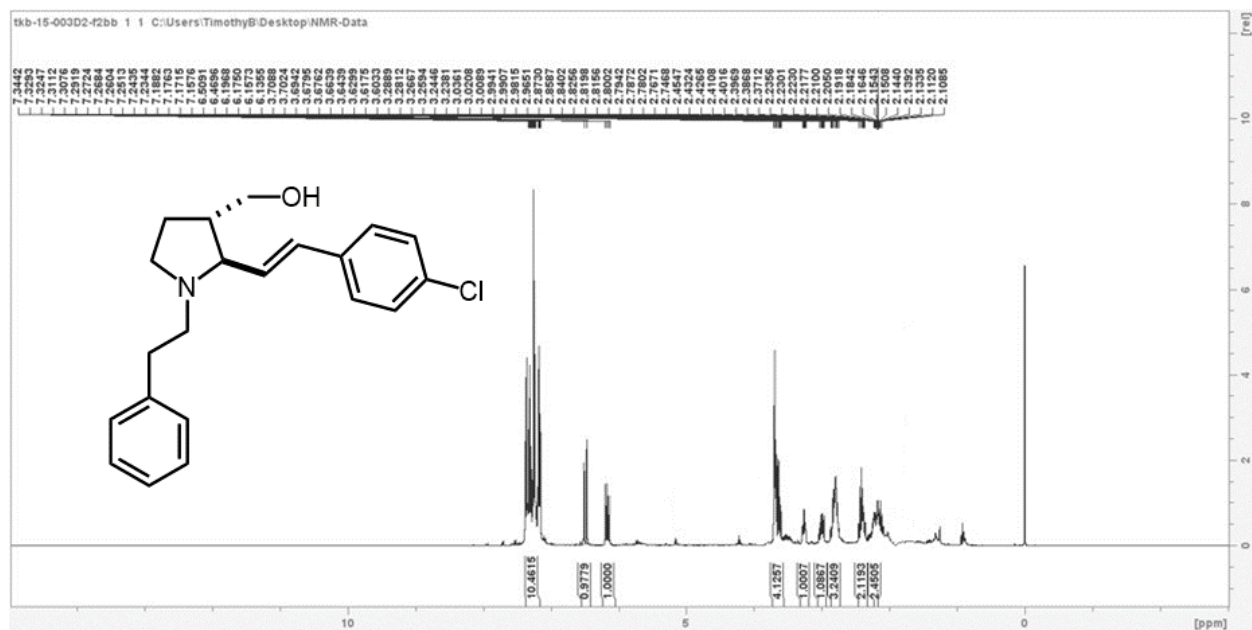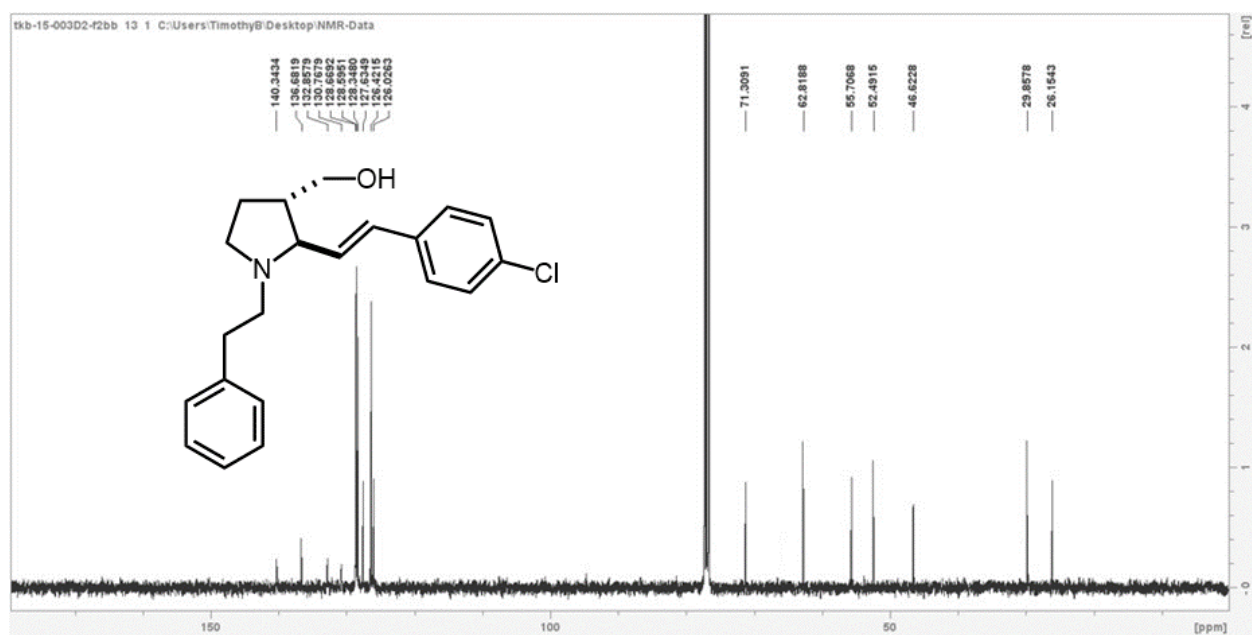

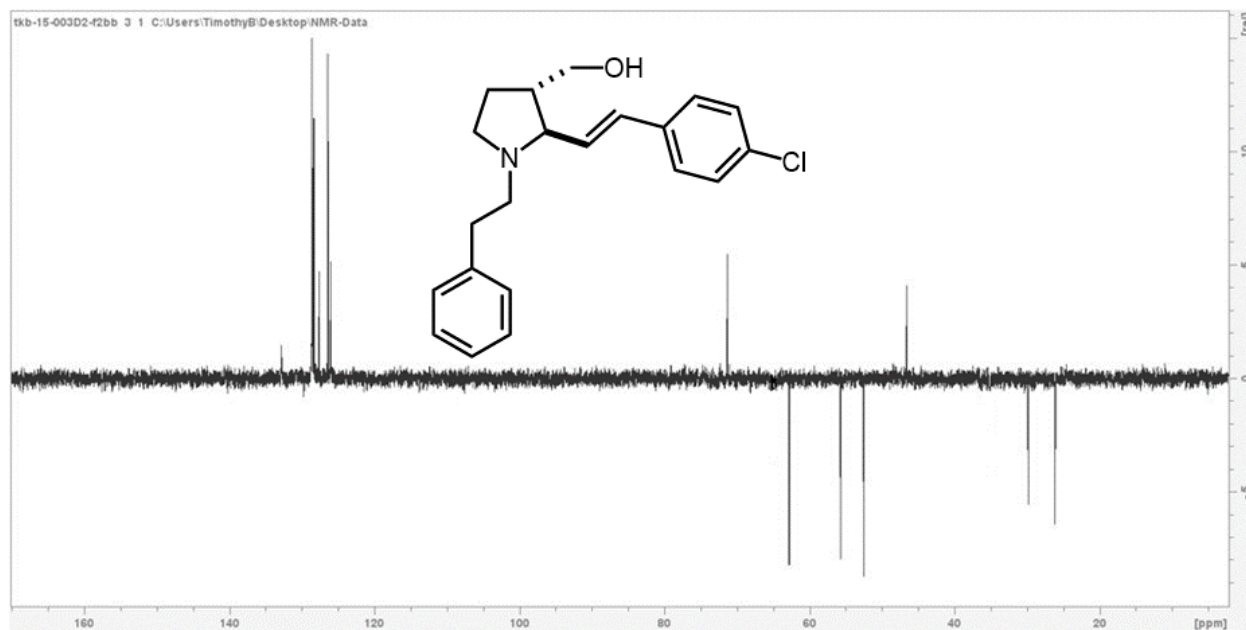

### Compound 6p

Prepared in 2.0 mmol scale using **General Procedures A** and **B**. Purification: Flash chromatography on silica eluting with hexane/acetone (90:10 to 50:50). Yellow oil. Yield = 580.4 mg, 86%, 95:5 dr.  $^1\text{H}$  NMR (400 MHz,  $\text{CDCl}_3$ )  $\delta$  7.37 – 7.22 (m, 5H), 7.13 – 7.01 (m, 2H), 6.85 – 6.75 (m, 2H), 6.47 (d,  $J = 15.8$  Hz, 1H), 6.15 (dd,  $J = 15.8, 8.7$  Hz, 1H), 3.75 (s, 3H), 3.58 (dd,  $J = 10.6, 5.9$  Hz, 1H), 3.25 (td,  $J = 8.7, 2.9$  Hz, 1H), 3.18 (s, 3H), 2.96 (ddd,  $J = 11.8, 10.3, 6.2$  Hz, 1H), 2.83 – 2.64 (m, 3H), 2.44 – 2.29 (m, 2H), 2.29 – 2.04 (m, 2H), 1.65 (d,  $J = 2.7$  Hz, 1H).  $^{13}\text{C}$  NMR (101 MHz,  $\text{CDCl}_3$ )  $\delta$  157.9, 136.7, 132.4, 130.7, 129.6, 128.6, 127.6, 126.43, 113.8, 71.3, 64.6, 56.1, 55.2, 52.6, 46.6, 34.2, 26.2. **HRMS- $\text{EI}^+$**  ( $m/z$ ): calc for  $\text{C}_{22}\text{H}_{27}\text{NO}_2$  [ $\text{M}$ ] $^+$  337.2042, found 337.2047.



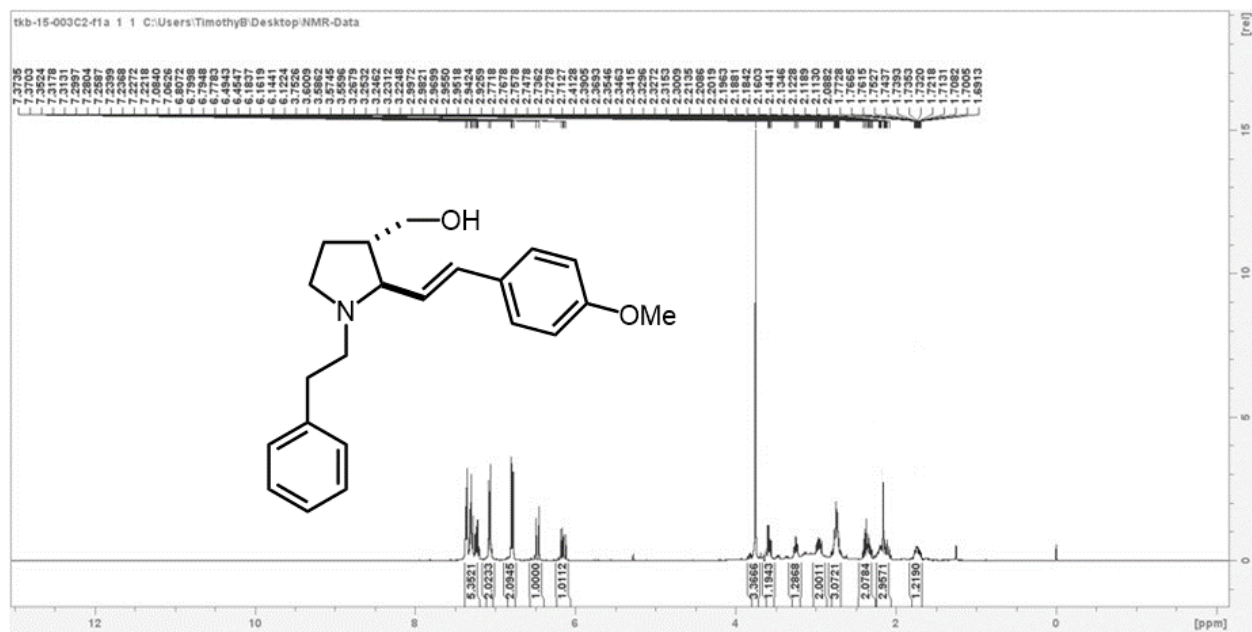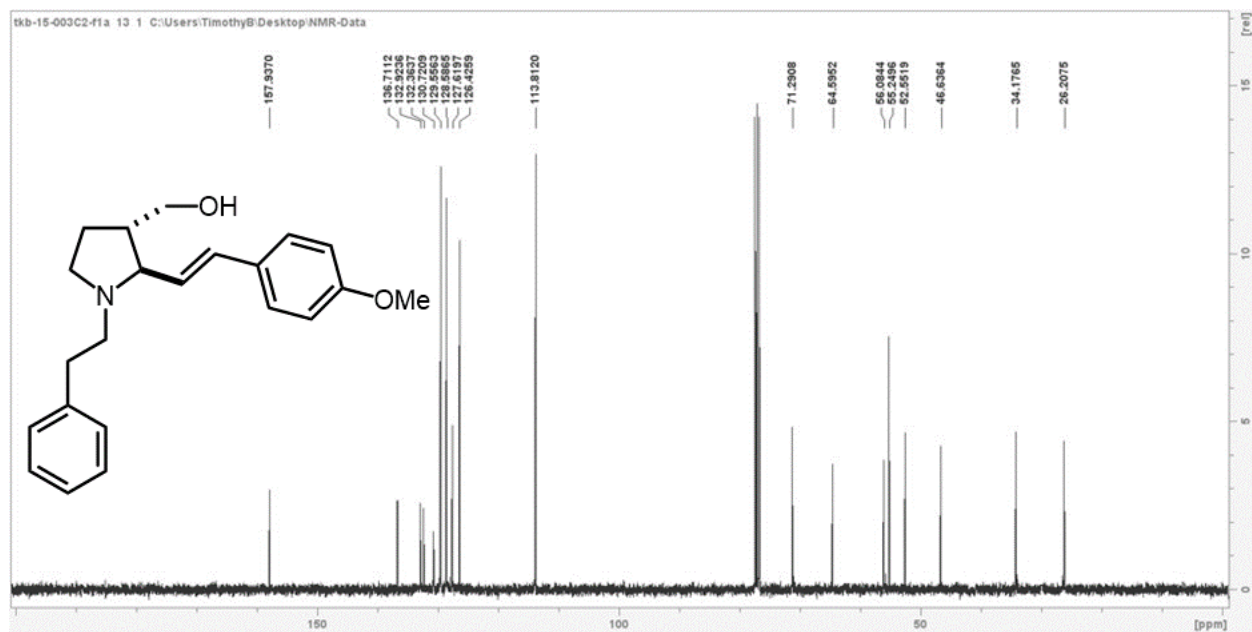

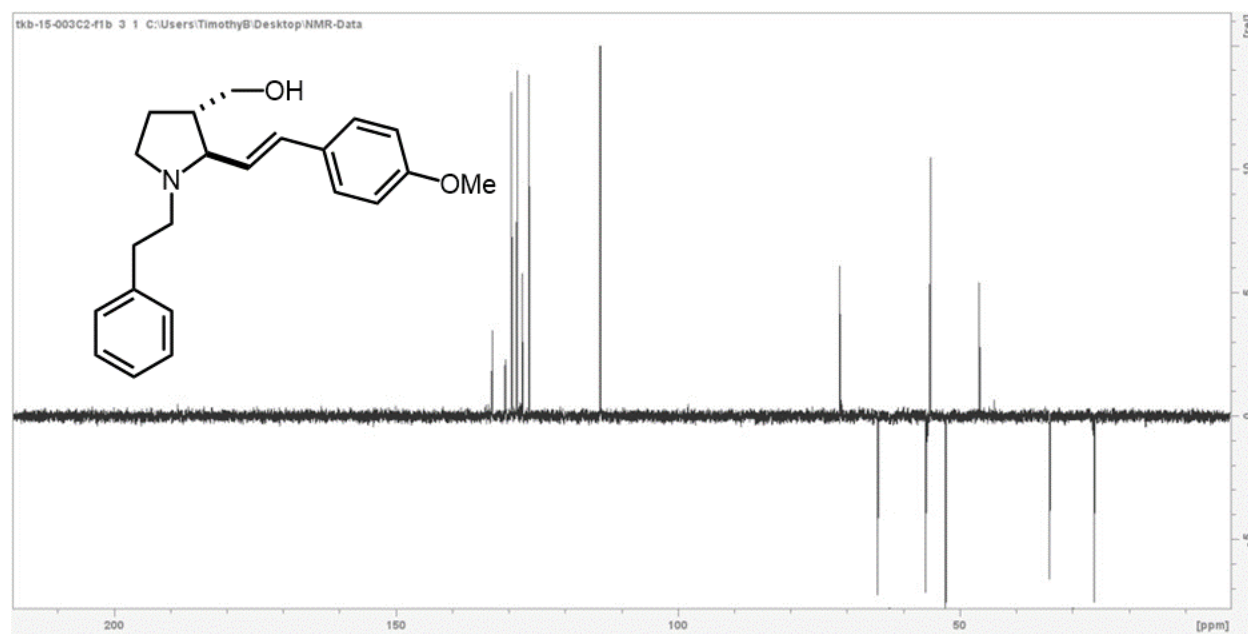

## Scheme 2 Results: Ring expansion of allylic pyrrolidine methanols

## Compound 8a

Prepared in 1.0 mmol scale using **General Procedure E**. Purification: Flash chromatography on silica eluting with hexane/acetone (90:10 to 70:30). Greenish-yellow oil. Yield = 309.1 mg, 90%, >99:1 dr.  $^1\text{H}$  NMR (400 MHz,  $\text{CDCl}_3$ )  $\delta$  7.96 (s, 1H), 7.41 – 7.21 (m, 4H), 7.14 (ddt,  $J$  = 9.1, 7.4, 1.7 Hz, 1H), 6.18 (dd,  $J$  = 12.1, 6.7 Hz, 1H), 5.55 (d,  $J$  = 6.7 Hz, 1H), 5.46 (dd,  $J$  = 12.1, 7.9 Hz, 1H), 4.15 (q,  $J$  = 7.1 Hz, 2H), 3.73 – 3.54 (m, 2H), 3.49 (dd,  $J$  = 10.3, 6.5 Hz, 1H), 3.38 (hept,  $J$  = 6.7 Hz, 1H), 3.17 – 3.06 (m, 1H), 2.66 (d,  $J$  = 15.4 Hz, 1H), 1.88 – 1.64 (m, 2H), 1.28 – 1.21 (m, 1H), 1.13 – 1.02 (m, 1H).  $^{13}\text{C}$  NMR (101 MHz,  $\text{CDCl}_3$ )  $\delta$  171.4, 148.0, 146.4, 131.4, 128.9, 128.1, 126.9, 125.2, 95.5, 67.5, 59.9, 57.9, 44.7, 41.0, 35.4, 32.9, 22.8, 22.4, 14.6. **HRMS- $\text{EI}^+$**  ( $m/z$ ): calc for  $\text{C}_{21}\text{H}_{29}\text{NO}_3$   $[\text{M}]^+$  343.2147, found 343.2152.

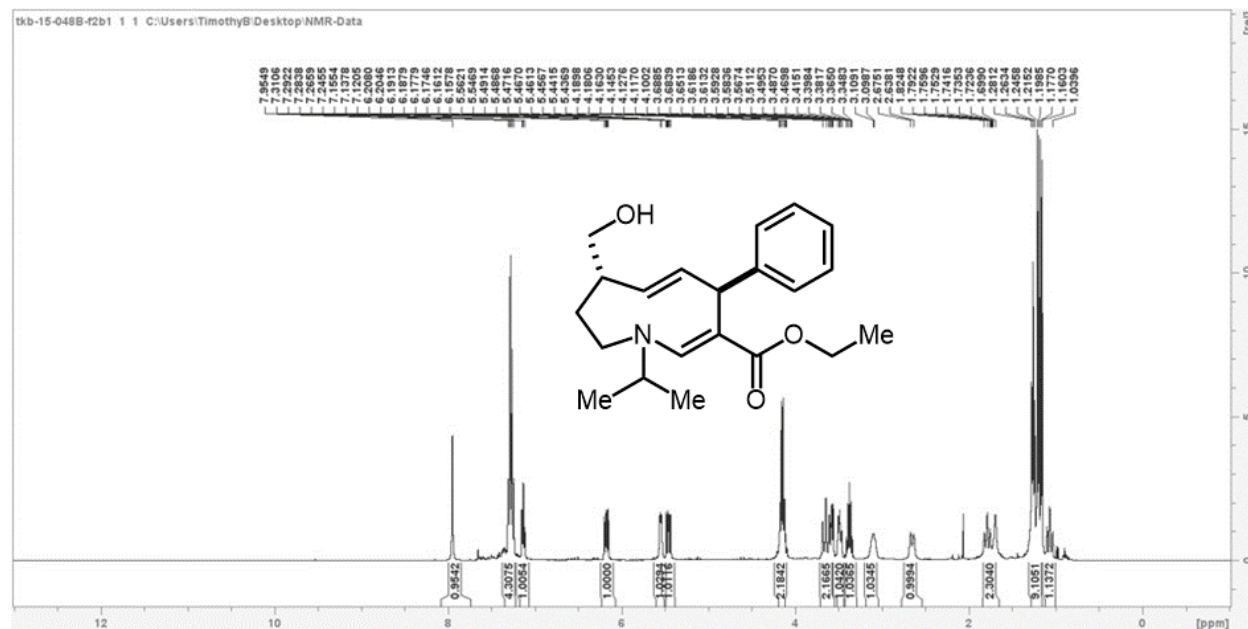

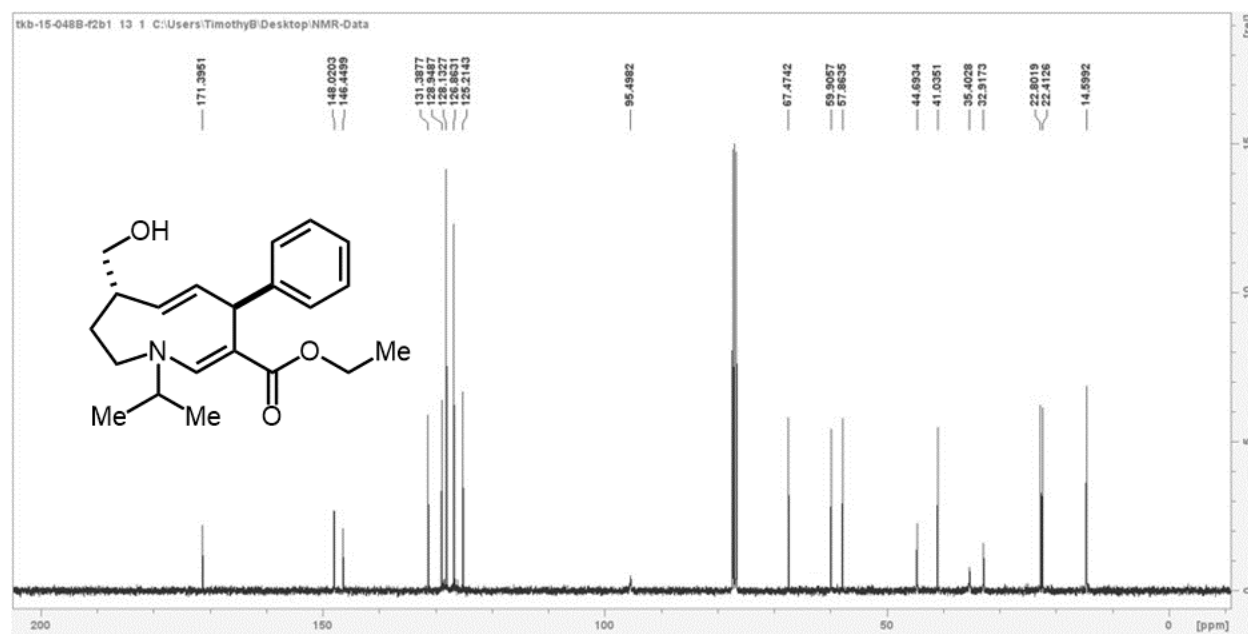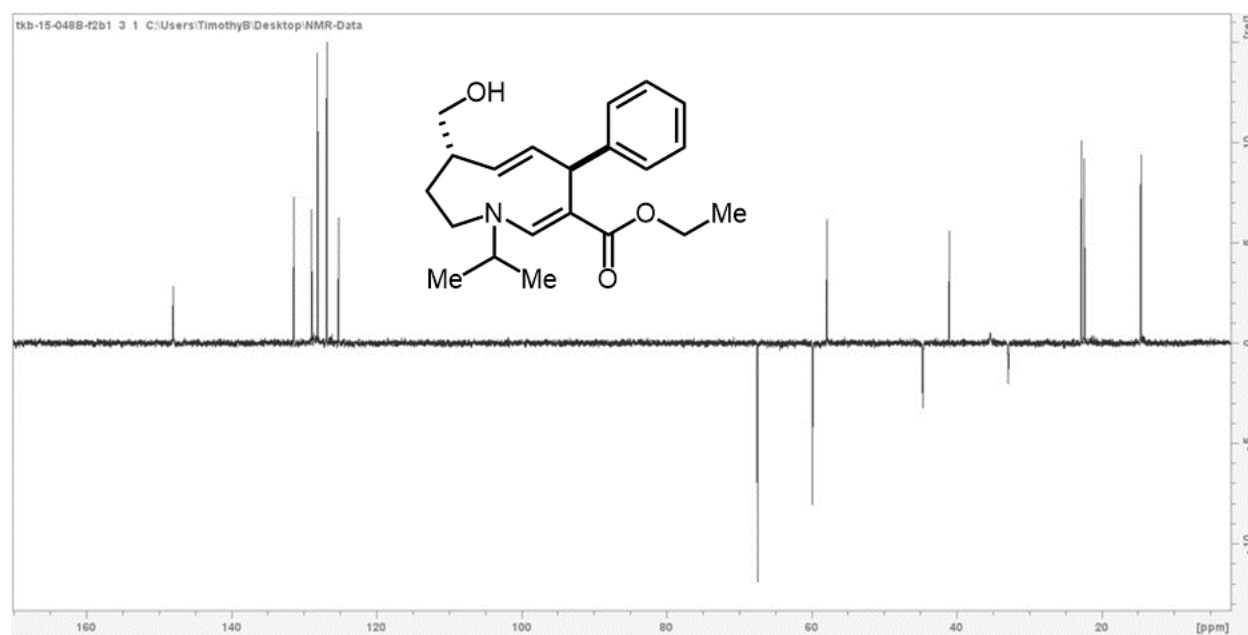

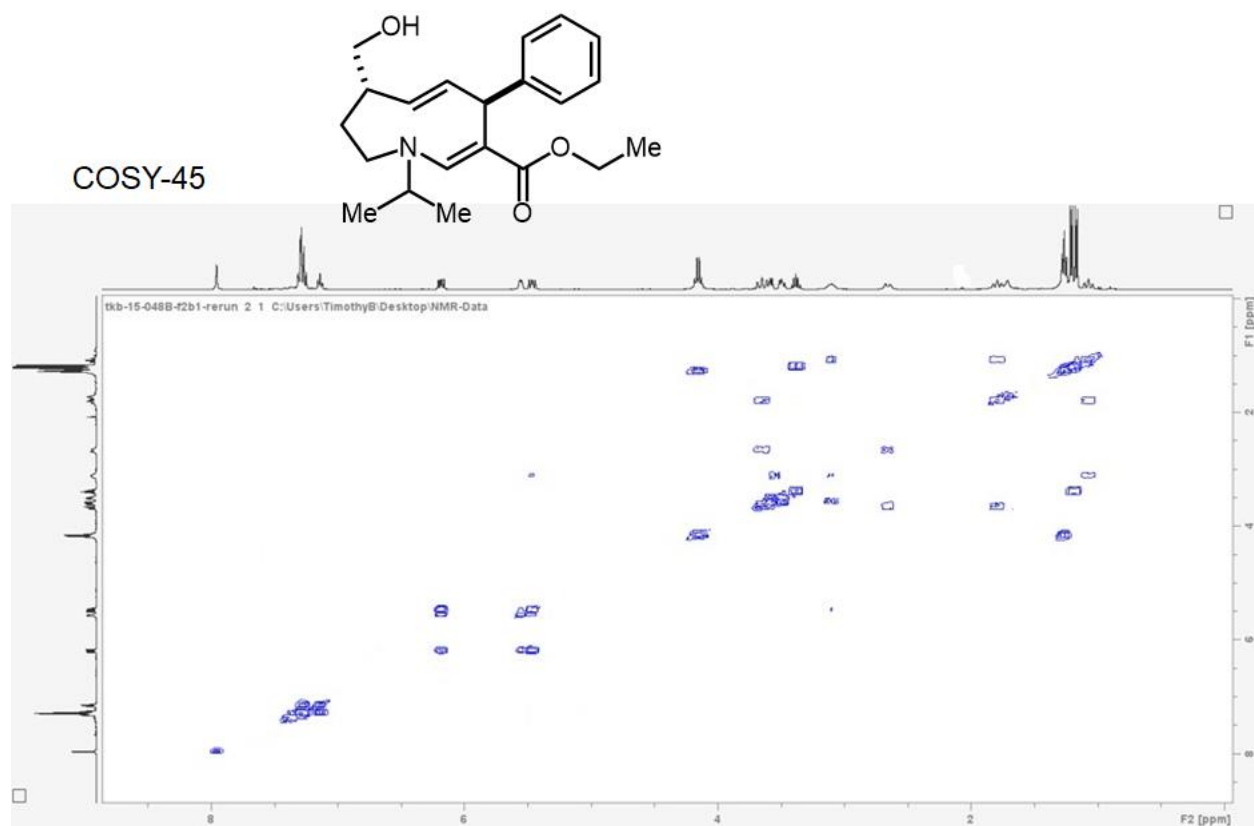

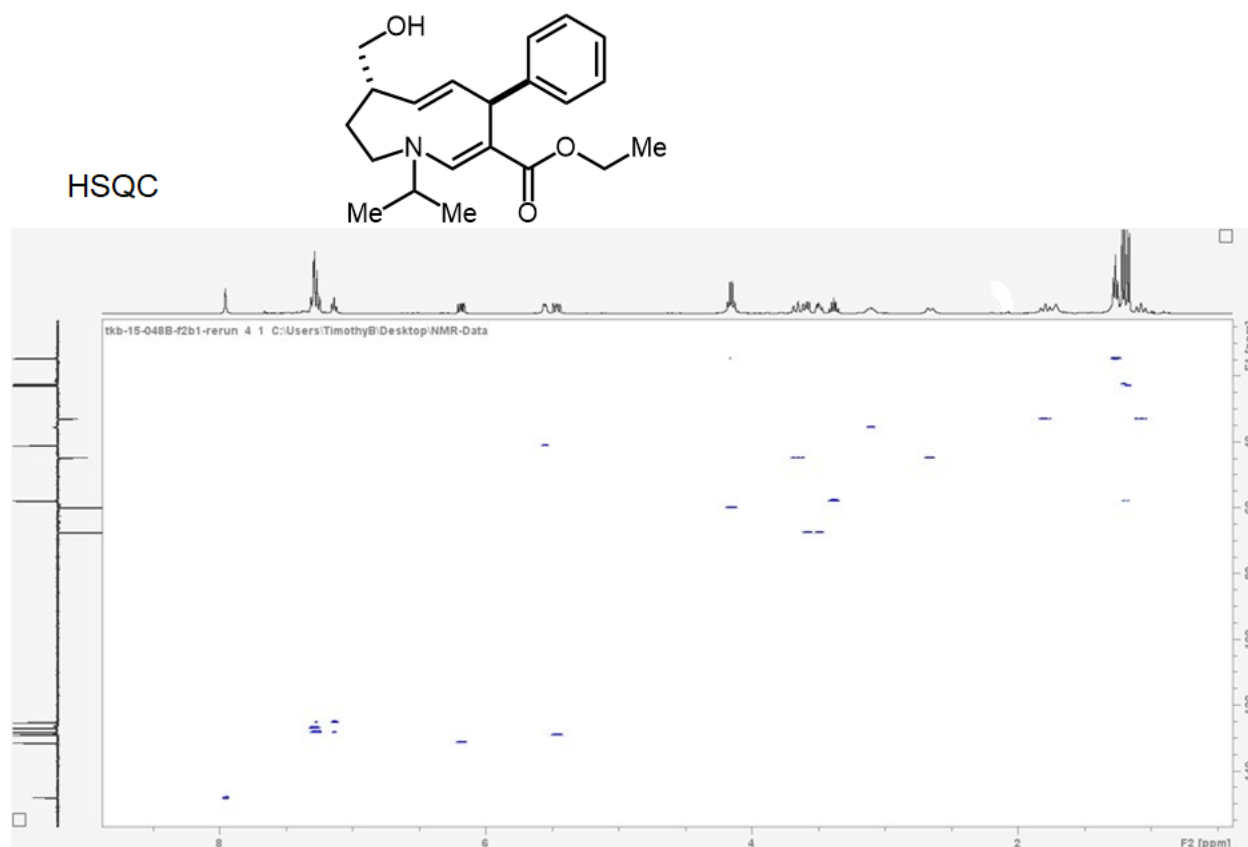

### Compound 8b

Prepared in 1.0 mmol scale using **General Procedure E**. Purification: Flash chromatography on silica eluting with hexane/acetone (90:10 to 60:40). Greenish-yellow oil. Yield = 351.1 mg, 94%, >99:1 dr.  $^1\text{H}$  NMR (400 MHz,  $\text{CDCl}_3$ )  $\delta$  7.66 (s, 1H), 7.30 (d,  $J = 7.1$  Hz, 2H), 6.84 (d,  $J = 7.1$  Hz, 2H), 6.35 – 6.25 (m, 2H), 4.15 (qd,  $J = 7.1, 1.1$  Hz, 2H), 3.93 – 3.87 (m, 1H), 3.81 (s, 3H), 3.73 (ddd,  $J = 14.1, 11.8, 2.2$  Hz, 1H), 3.58 (dd,  $J = 7.1, 2.1$  Hz, 2H), 3.46 (hept,  $J = 6.6$  Hz, 1H), 2.99 – 2.86 (m, 2H), 1.96 (dddd,  $J = 15.6, 7.9, 5.5, 2.2$  Hz, 1H), 1.63 (dddd,  $J = 14.9, 11.8, 6.6, 3.1$  Hz, 1H), 1.29 – 1.14 (m, 10H).  $^{13}\text{C}$  NMR (101 MHz,  $\text{CDCl}_3$ )  $\delta$  170.8, 162.6, 158.6, 148.9, 134.7, 130.9, 128.1, 127.1, 113.9, 94.6, 66.7, 59.6, 58.0, 55.3, 44.0, 43.5, 38.9, 28.7, 21.4, 21.2, 14.7. **HRMS- $\text{EI}^+$**  ( $m/z$ ): calc for  $\text{C}_{22}\text{H}_{31}\text{NO}_4$   $[\text{M}]^+$  373.2253, found 373.2257.

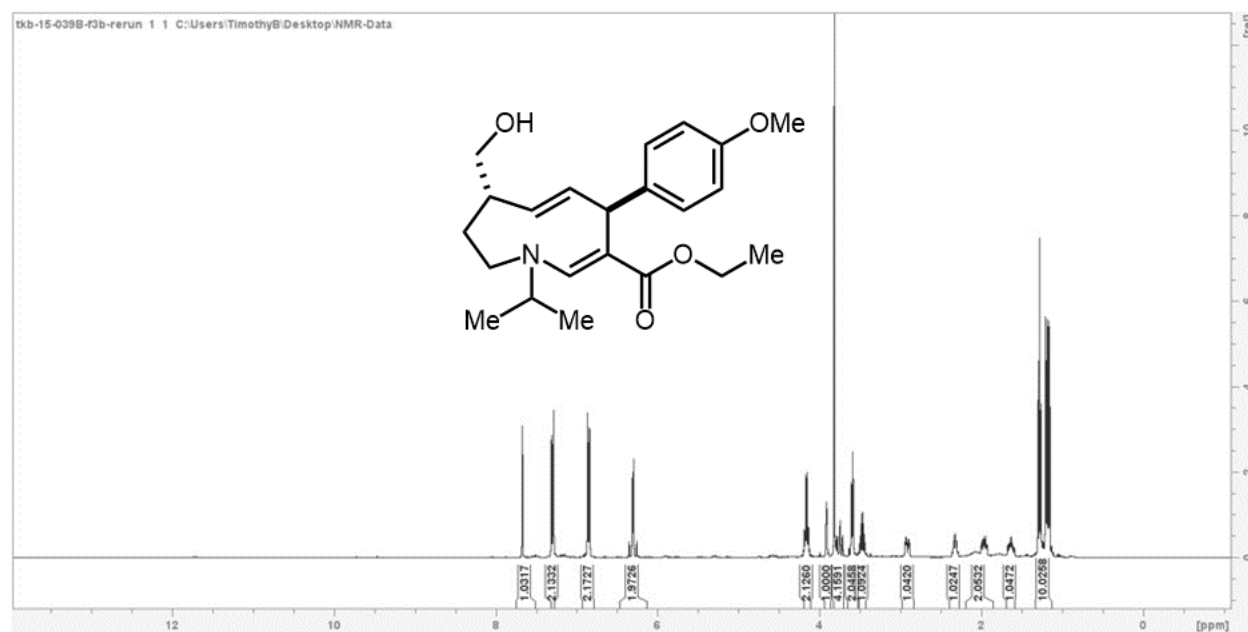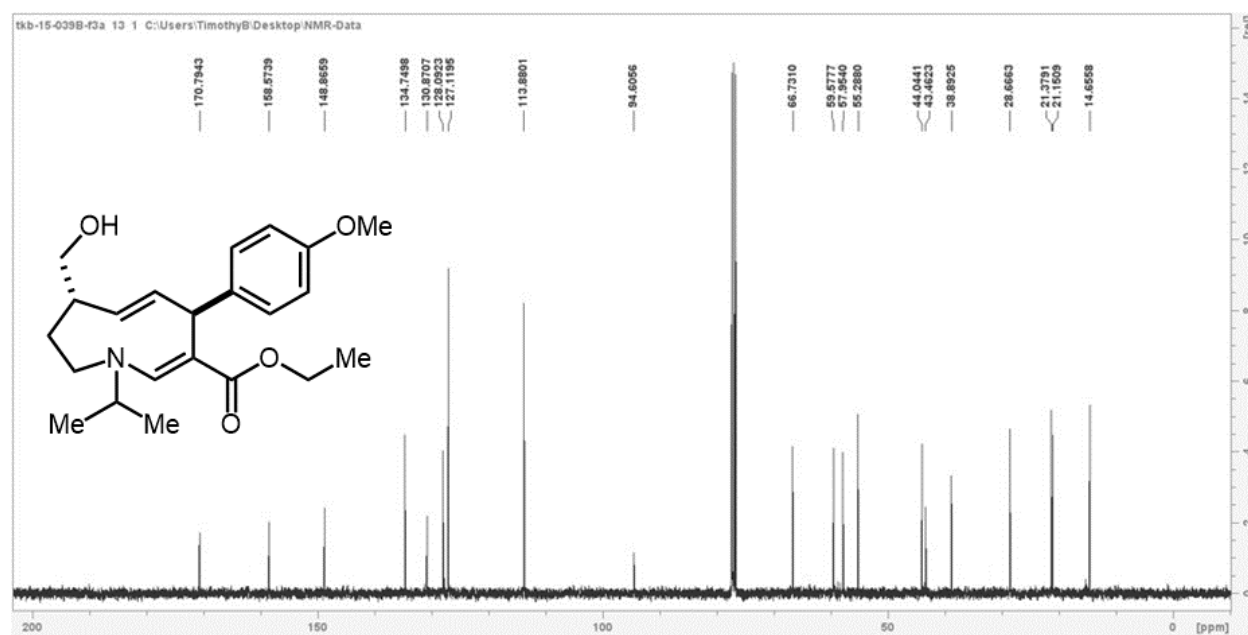

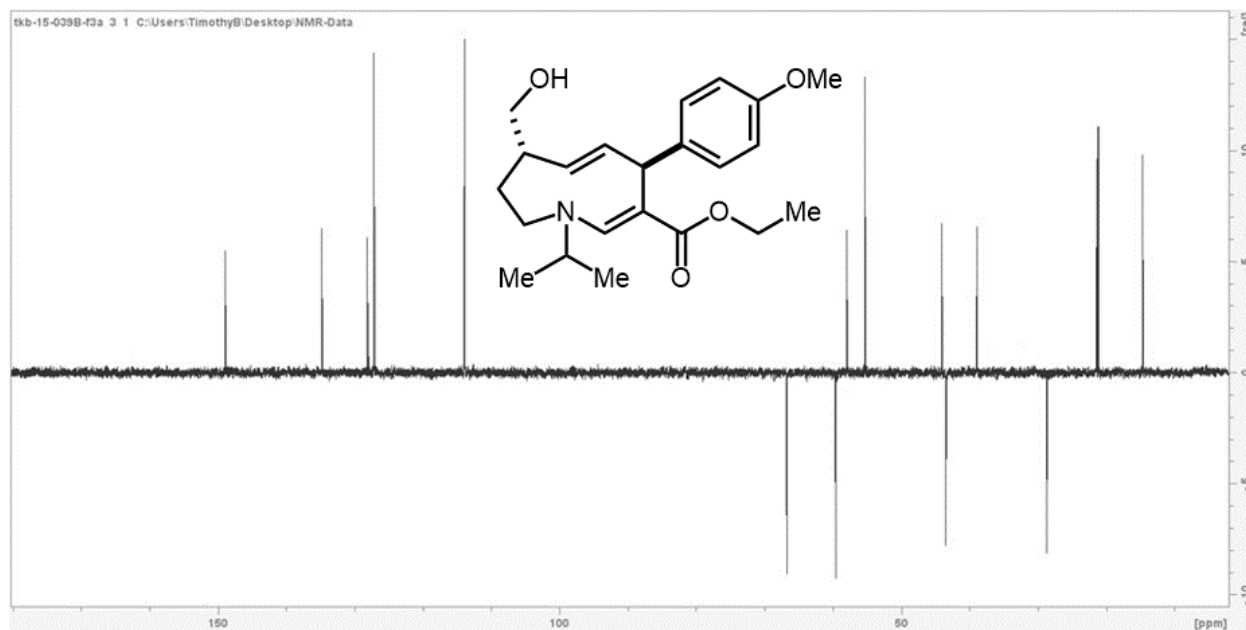

### Compound 8c

Prepared in 1.0 mmol scale using **General Procedure E**. Purification: Flash chromatography on silica eluting with hexane/acetone (90:10 to 70:30). Greenish-yellow oil. Yield = 360.9 mg, 89%, >99:1 dr.  $^1\text{H}$  NMR (400 MHz,  $\text{CDCl}_3$ )  $\delta$  7.74 (s, 1H), 7.42 – 7.25 (m, 4H), 7.21 (ddt,  $J$  = 8.0, 4.9, 2.3 Hz, 4H), 6.97 – 6.90 (m, 2H), 6.17 (dd,  $J$  = 12.2, 6.4 Hz, 1H), 5.59 (d,  $J$  = 6.4 Hz, 1H), 5.46 (dd,  $J$  = 12.2, 8.1 Hz, 1H), 4.17 (q,  $J$  = 7.1 Hz, 2H), 3.67 (t,  $J$  = 13.8 Hz, 1H), 3.57 (dd,  $J$  = 10.3, 6.6 Hz, 1H), 3.47 (dq,  $J$  = 13.8, 6.4 Hz, 2H), 3.30 (dt,  $J$  = 13.8, 6.8 Hz, 1H), 3.12 (d,  $J$  = 12.0 Hz, 1H), 2.87 – 2.65 (m, 2H), 2.40 (d,  $J$  = 15.0 Hz, 1H), 1.78 (tt,  $J$  = 13.0, 3.1 Hz, 1H), 1.49 – 1.40 (m, 2H), 1.27 (t,  $J$  = 7.2 Hz, 3H), 1.04 – 0.89 (m, 1H).  $^{13}\text{C}$  NMR (101 MHz,  $\text{CDCl}_3$ )  $\delta$  171.23, 150.85, 146.34, 138.21, 131.63, 128.97, 128.78, 128.57, 128.26, 127.16, 126.41, 125.37, 96.46, 67.52, 60.04, 59.03, 46.09, 40.93, 36.76, 35.15, 30.82, 14.63. **HRMS- $\text{EI}^+$**  ( $m/z$ ): calc for  $\text{C}_{26}\text{H}_{31}\text{NO}_3$   $[\text{M}]^+$  405.2304, found 405.2308.



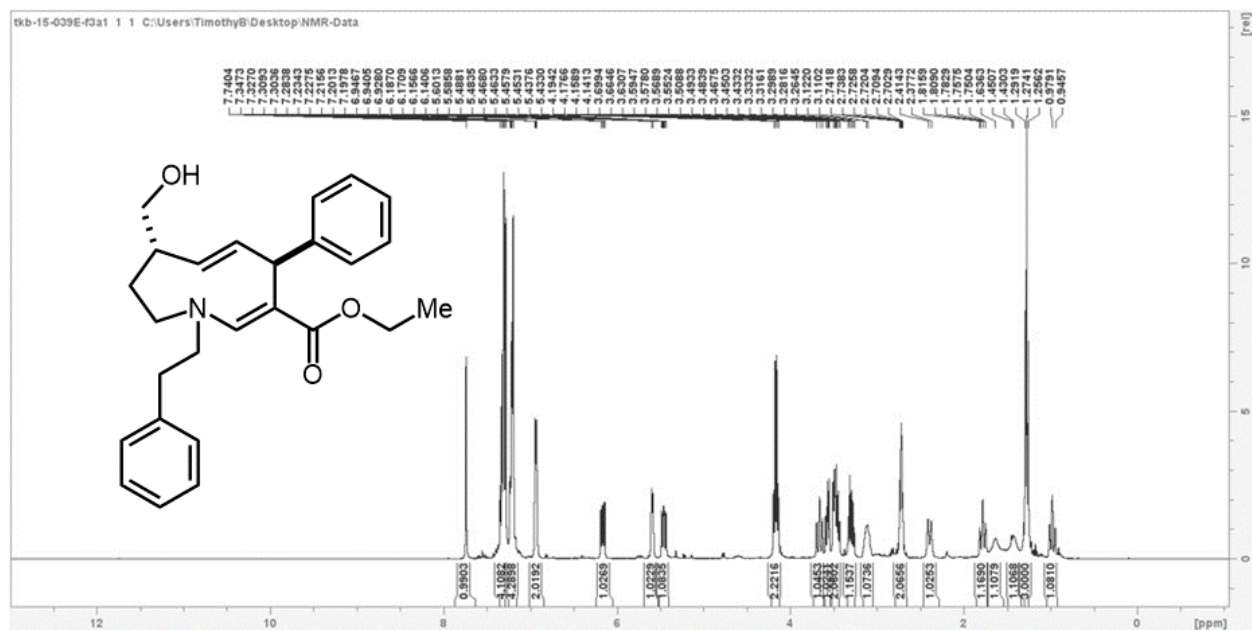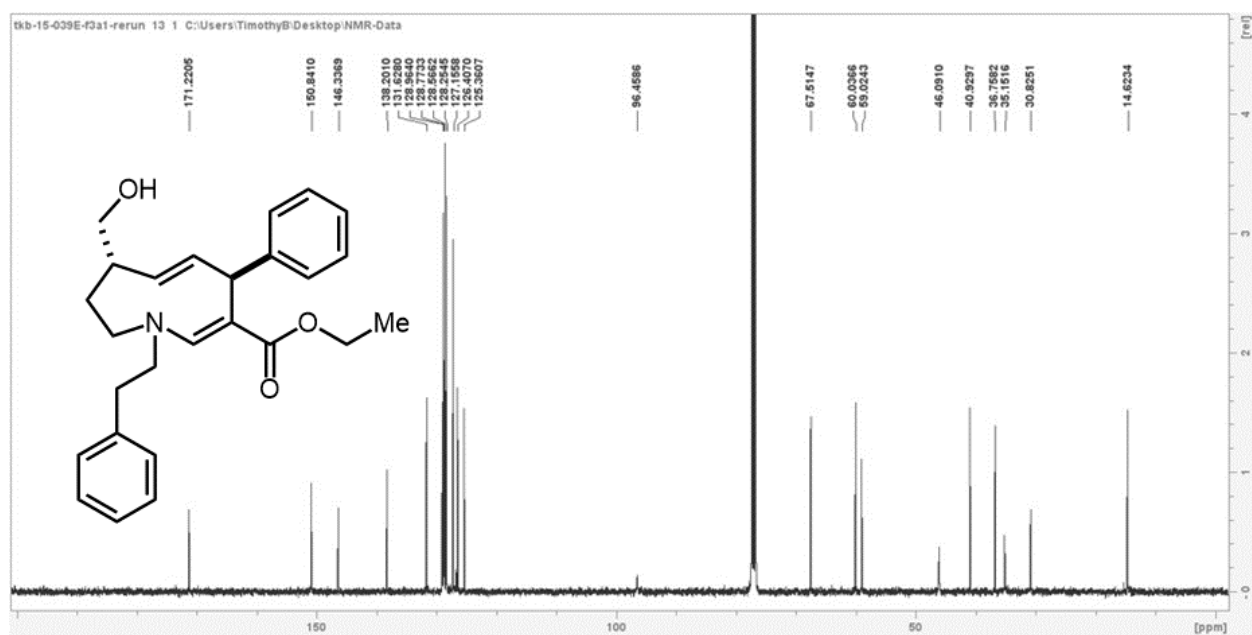

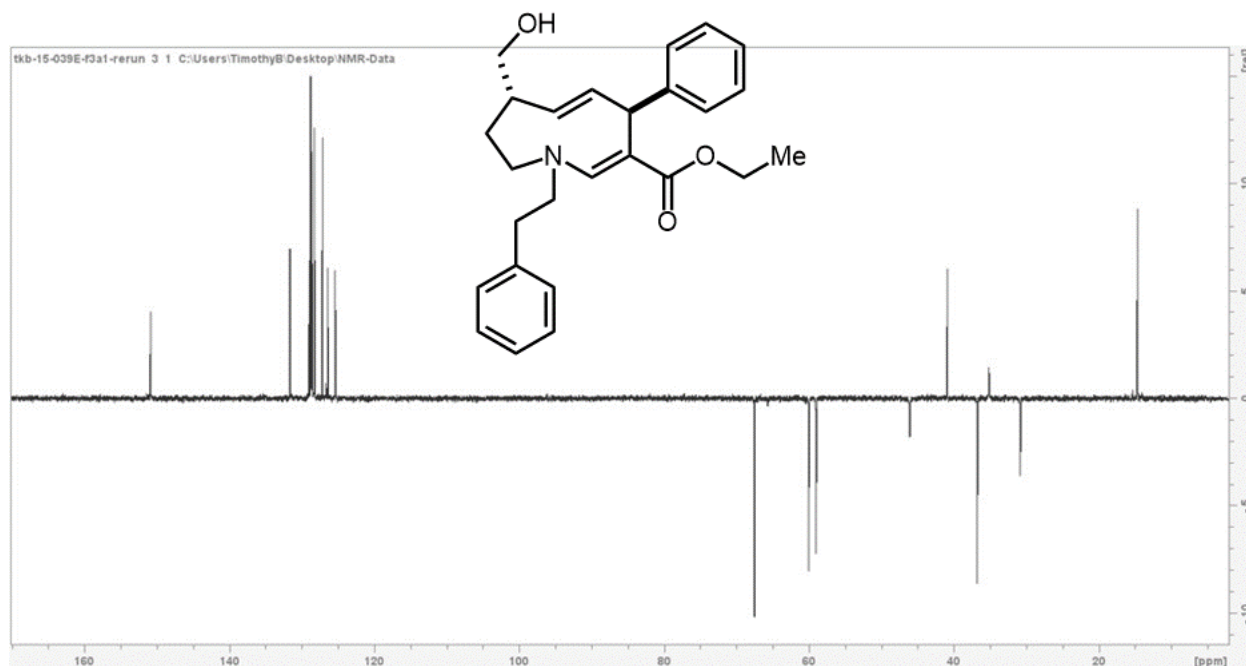

### Compound 8d

Prepared in 1.0 mmol scale using **General Procedure E**. Purification: Flash chromatography on silica eluting with hexane/acetone (90:10 to 70:30). Pale-yellow oil. Yield = 400.7 mg, 92%, >99:1 dr. <sup>1</sup>H NMR (400 MHz, CDCl<sub>3</sub>) δ 7.74 (s, 1H), 7.32 (h, *J* = 6.0 Hz, 4H), 7.22 (td, *J* = 6.9, 2.2 Hz, 1H), 6.82 (d, *J* = 7.2 Hz, 2H), 6.72 (d, *J* = 7.2 Hz, 2H), 6.16 (ddd, *J* = 12.2, 6.4, 1.5 Hz, 1H), 5.60 (d, *J* = 6.3 Hz, 1H), 5.46 (ddd, *J* = 12.2, 8.0, 2.0 Hz, 1H), 4.17 (q, *J* = 7.1 Hz, 2H), 3.79 (s, 3H), 3.75 – 3.63 (m, 1H), 3.63 – 3.35 (m, 3H), 3.24 (dt, *J* = 13.8, 6.9 Hz, 1H), 3.12 (br s, 1H), 2.66 (td, *J* = 6.7, 4.0 Hz, 2H), 2.35 (d, *J* = 15.0 Hz, 1H), 1.80 – 1.68 (m, 2H), 1.30 (br. s, 1H), 1.28 (t, *J* = 7.1 Hz, 3H), 0.97 (tt, *J* = 13.2, 2.5 Hz, 1H). <sup>13</sup>C NMR (101 MHz, CDCl<sub>3</sub>) δ 171.28, 158.13, 150.89, 146.46, 131.57, 130.22, 129.72, 129.03, 128.25, 127.21, 125.34, 113.96, 98.21, 67.52, 60.04, 59.21, 55.21, 46.14, 40.93, 35.89, 35.14, 30.81, 14.63. **HRMS-EI<sup>+</sup>** (*m/z*): calc for C<sub>27</sub>H<sub>33</sub>NO<sub>4</sub> [M]<sup>+</sup> 435.2410, found 435.2414.

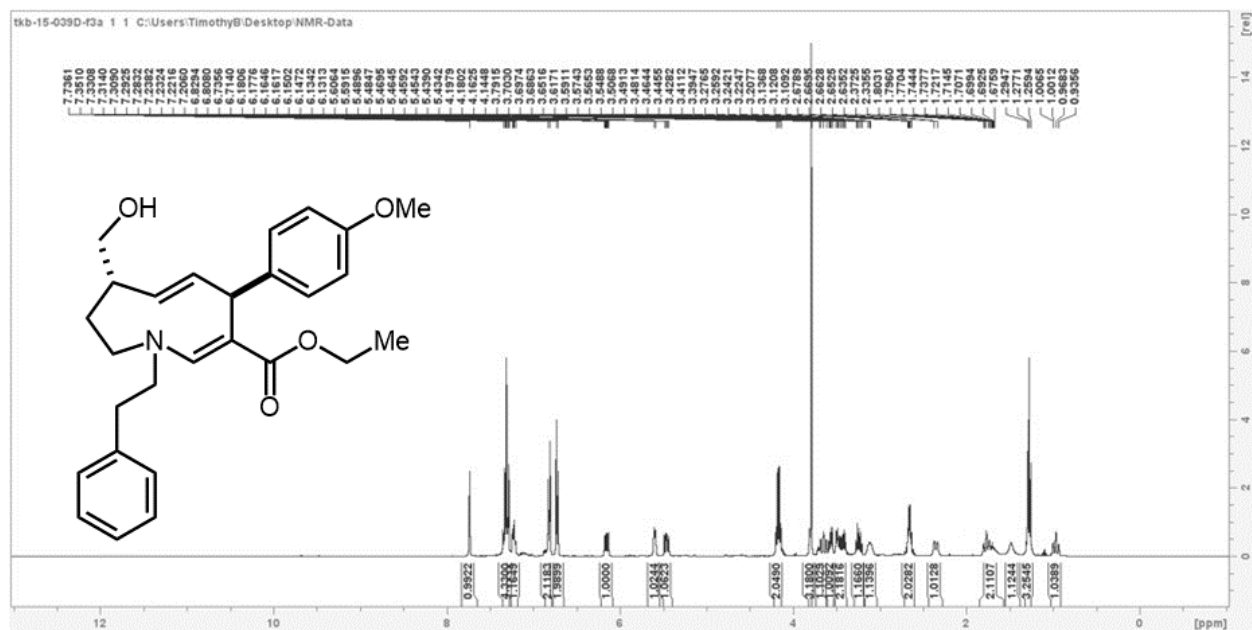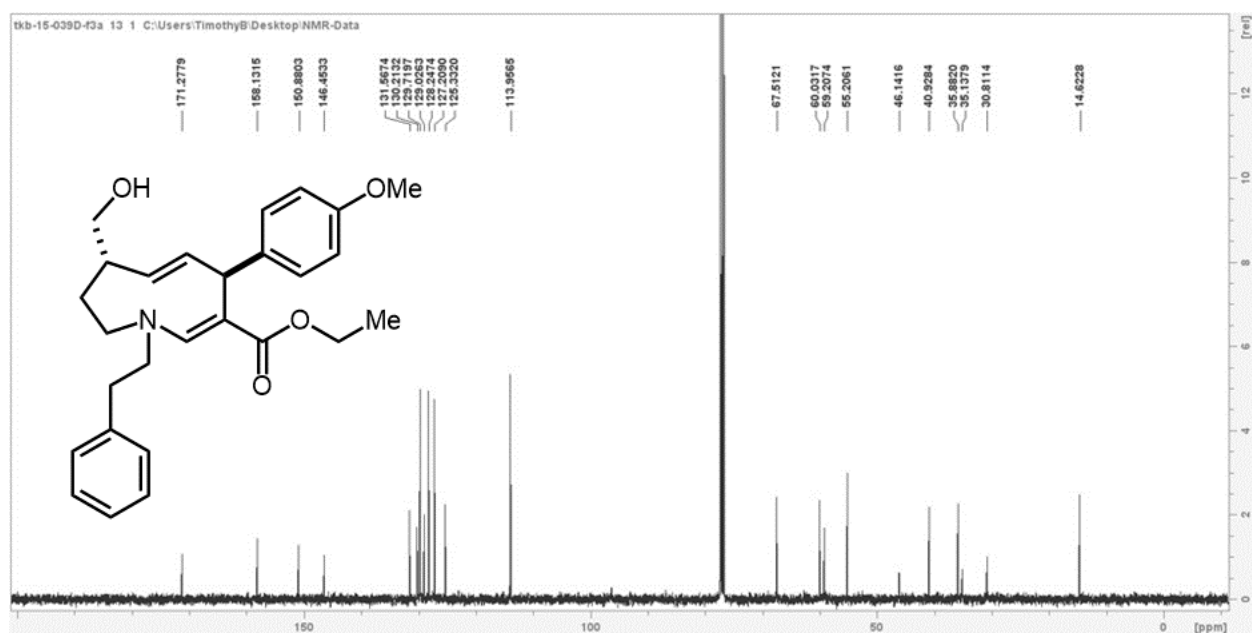

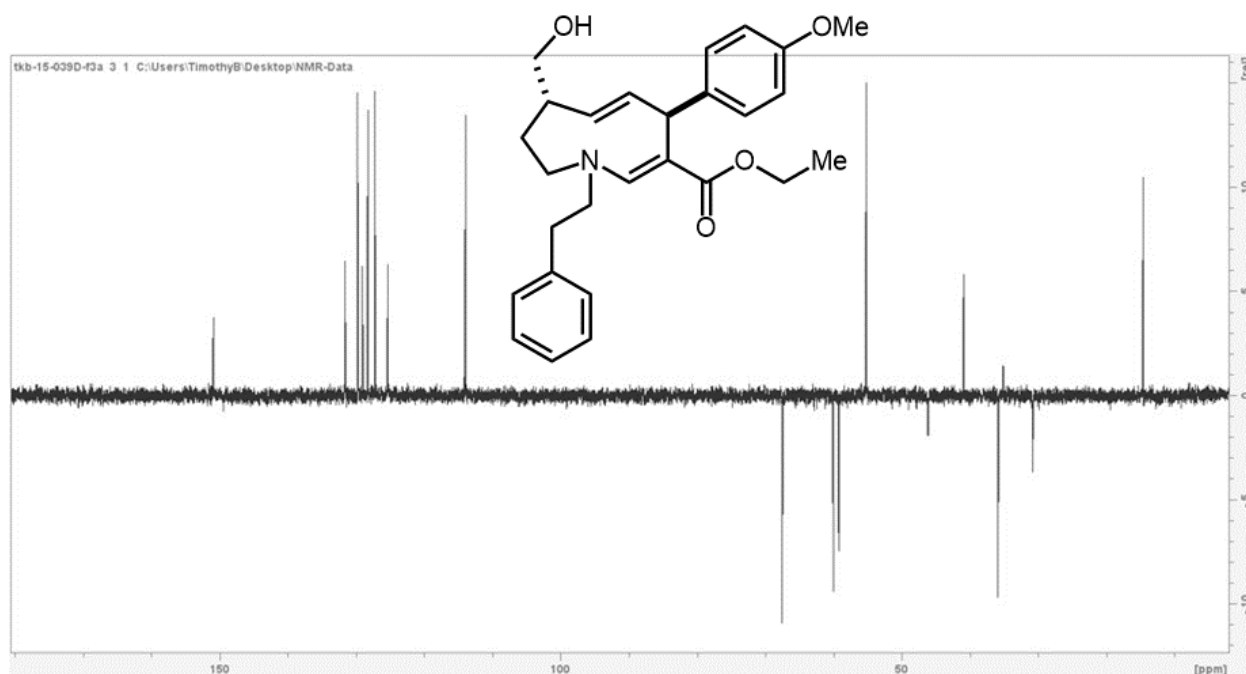

### Compound 8e

Prepared in 1.0 mmol scale using **General Procedure E**. Purification: Flash chromatography on silica eluting with hexane/acetone (90:10 to 70:30). Amorphous solid. Yield = 378.4 mg, 86%, >99:1 dr.  $^1\text{H}$  NMR (400 MHz,  $\text{CDCl}_3$ )  $\delta$  7.74 (s, 1H), 7.37 – 7.28 (m, 5H), 7.26 – 7.16 (m, 2H), 6.93 (dd,  $J$  = 7.2, 2.3 Hz, 2H), 6.17 (ddd,  $J$  = 12.1, 6.4, 1.5 Hz, 1H), 5.60 (d,  $J$  = 6.4 Hz, 1H), 5.46 (ddd,  $J$  = 12.3, 8.0, 2.0 Hz, 1H), 4.22 – 4.12 (m, 2H), 3.66 (t,  $J$  = 13.8 Hz, 1H), 3.56 (d,  $J$  = 7.9 Hz, 1H), 3.47 (dt,  $J$  = 13.6, 6.9 Hz, 2H), 3.40 – 3.24 (m, 1H), 3.12 (br. s, 1H), 2.72 (td,  $J$  = 6.8, 2.6 Hz, 2H), 2.39 (d,  $J$  = 14.8 Hz, 1H), 1.78 (t,  $J$  = 13.1 Hz, 1H), 1.29 – 1.22 (m, 5H), 1.03 – 0.86 (m, 1H).  $^{13}\text{C}$  NMR (101 MHz,  $\text{CDCl}_3$ )  $\delta$  171.22, 150.84, 146.34, 138.20, 131.66, 128.95, 128.78, 128.57, 128.26, 127.16, 126.41, 125.37, 67.53, 60.04, 59.03, 46.09, 40.93, 36.77, 30.82, 29.71, 14.63. **HRMS- $\text{EI}^+$**  ( $m/z$ ): calc for  $\text{C}_{26}\text{H}_{30}\text{ClNO}_3$   $[\text{M}]^+$  439.1914, found 439.1917.

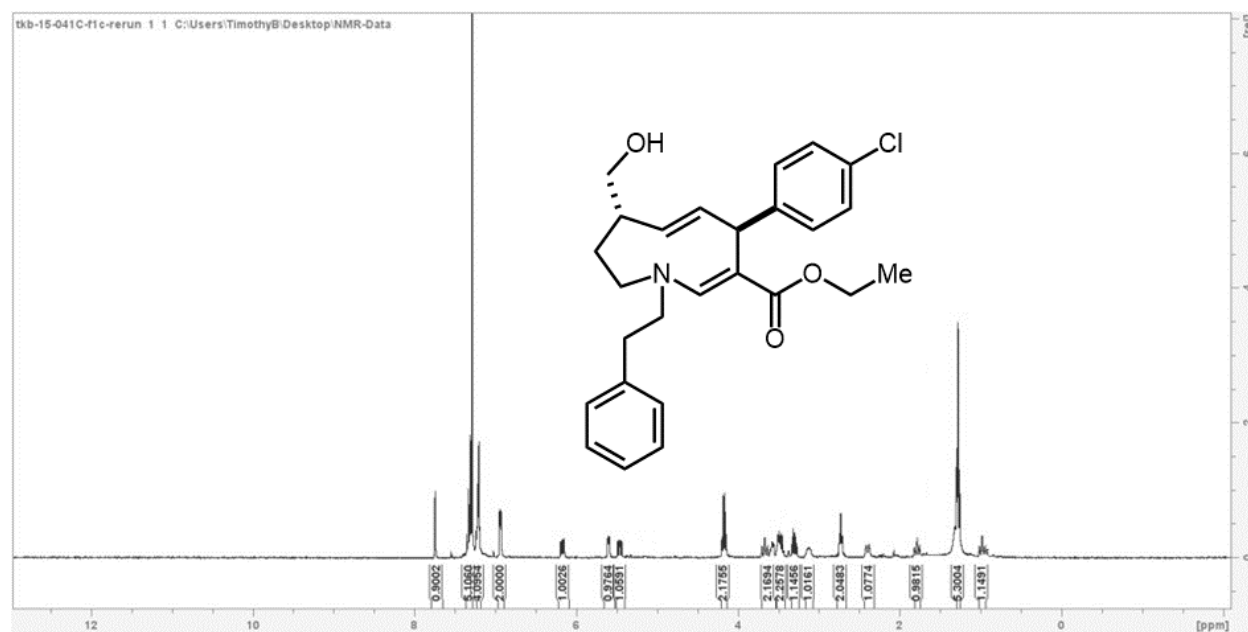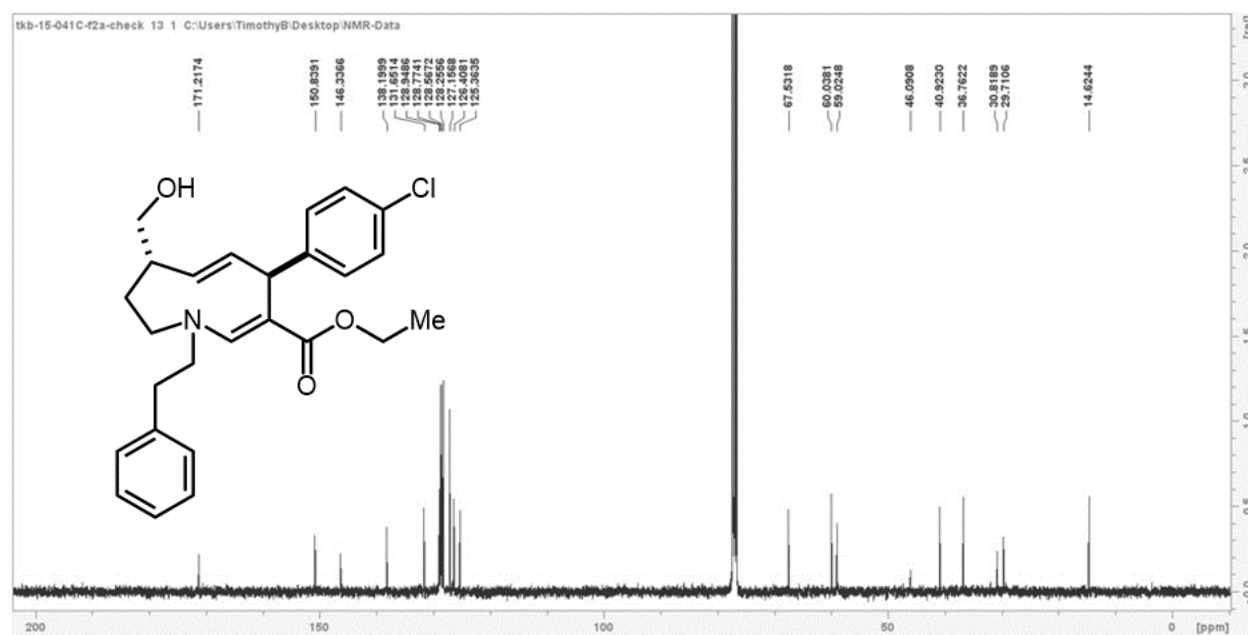

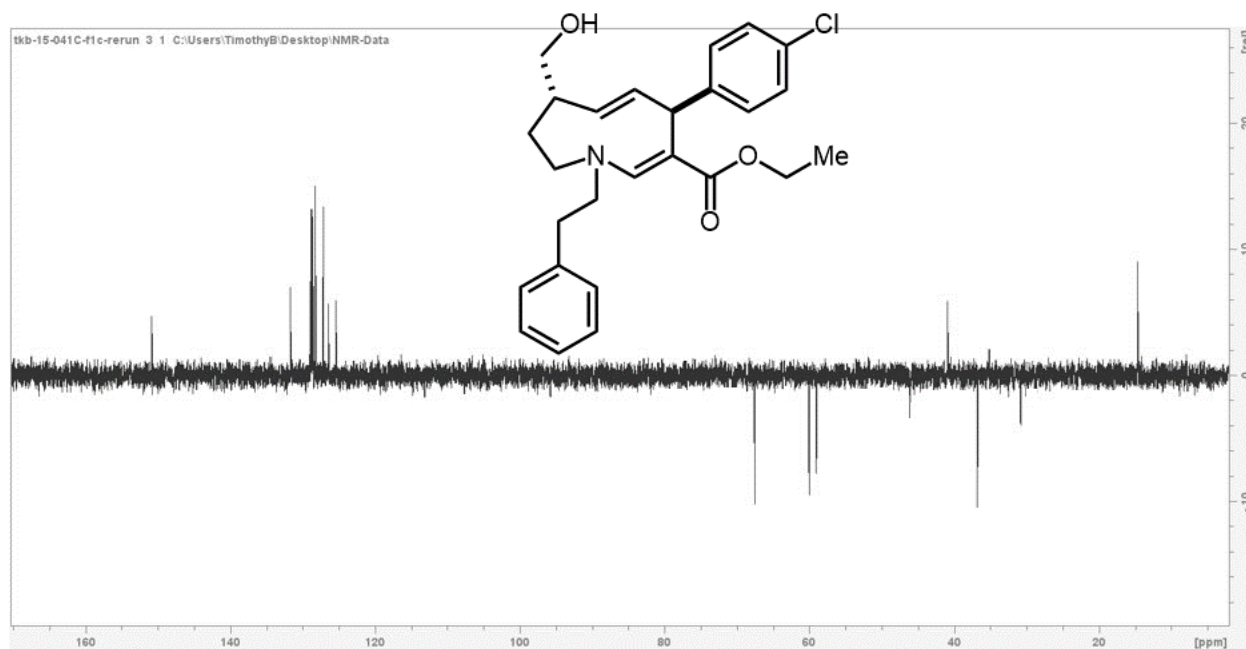

### Compound 8f

Prepared in 1.0 mmol scale using **General Procedure E**. Purification: Flash chromatography on silica eluting with hexane/acetone (90:10 to 70:30). Greenish-yellow oil. Yield = 373.1 mg, 92%, >99:1 dr.  $^1\text{H}$  NMR (400 MHz,  $\text{CDCl}_3$ )  $\delta$  7.36 – 7.14 (m, 9H), 6.68 – 6.66 (d, 2H), 5.55 (s, 1H), 5.43 (d,  $J$  = 7.5 Hz, 1H), 4.40 – 4.07 (m, 5H), 3.59 (dd,  $J$  = 10.3, 6.3 Hz, 1H), 3.49 (dd,  $J$  = 10.6, 6.3 Hz, 1H), 3.31 (br. s, 1H), 2.41 (d,  $J$  = 15.1 Hz, 1H), 2.03 (s, 3H), 1.82 (tt,  $J$  = 13.0, 3.2 Hz, 1H), 1.59 (br. s, 2H), 1.37 – 1.20 (m, 3H), 1.10 (tt,  $J$  = 13.1, 2.7 Hz, 1H).  $^{13}\text{C}$  NMR (101 MHz,  $\text{CDCl}_3$ )  $\delta$  171.18, 151.78, 146.20, 137.38, 136.60, 128.57, 128.53, 128.42, 128.04, 127.28, 126.32, 125.19, 98.82, 68.09, 61.05, 60.08, 45.92, 35.81, 30.82, 27.83, 14.64, 12.55. **HRMS- $\text{EI}^+$**  ( $m/z$ ): calc for  $\text{C}_{26}\text{H}_{31}\text{NO}_3$   $[\text{M}]^+$  405.2304, found 405.2309.

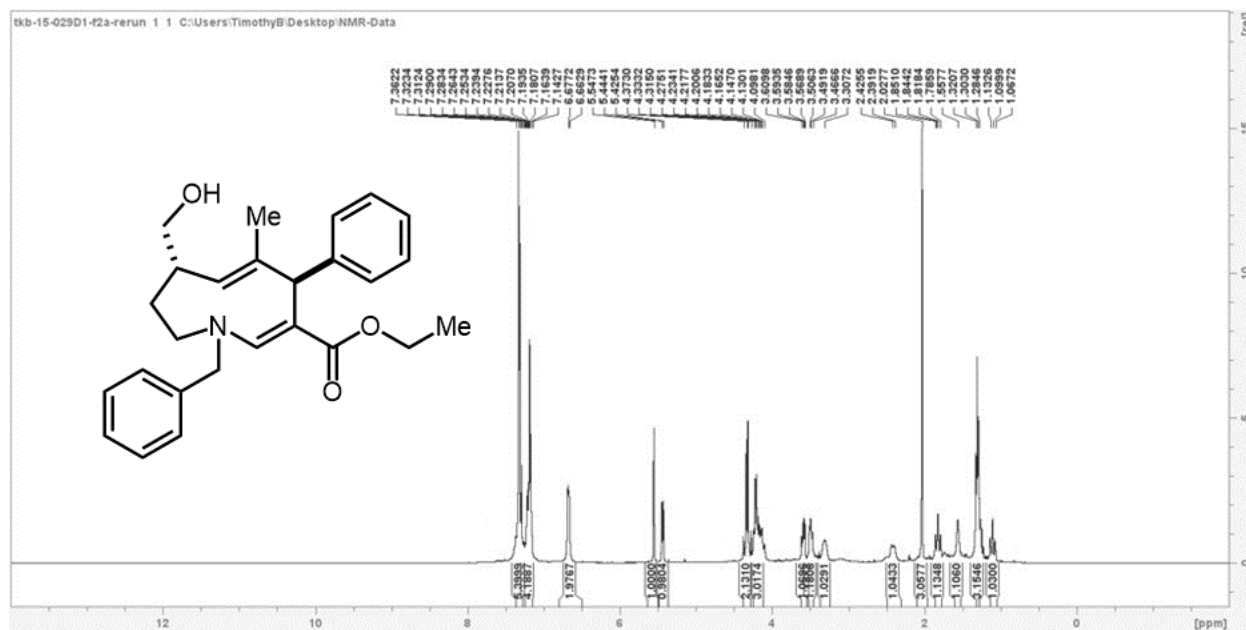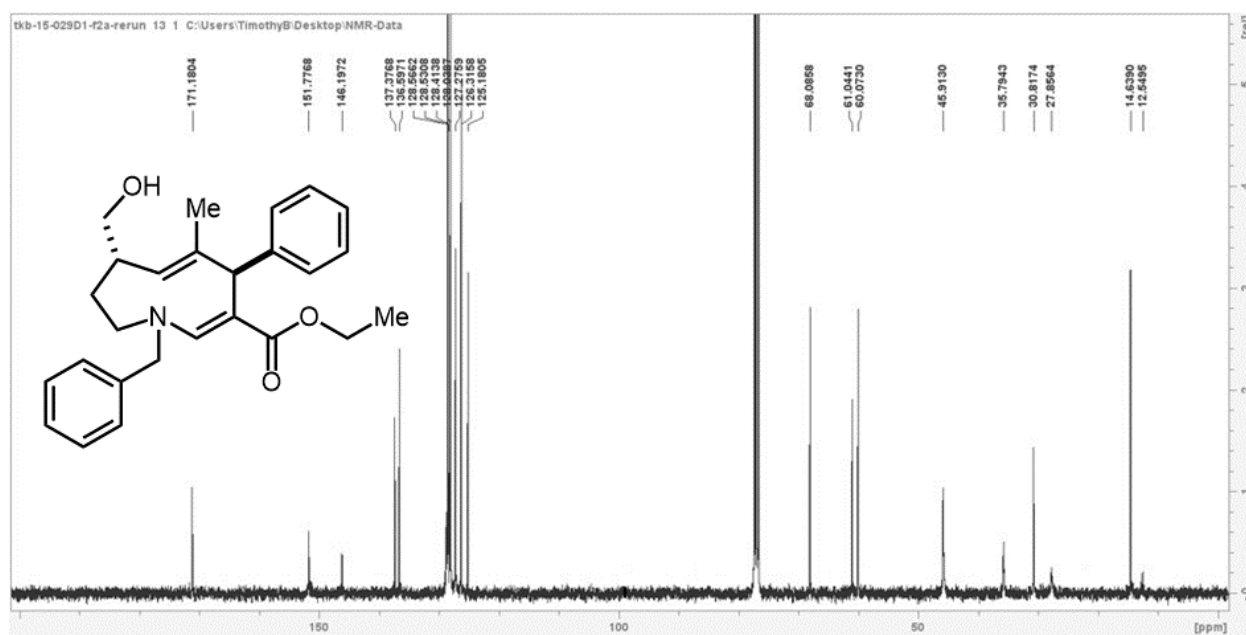

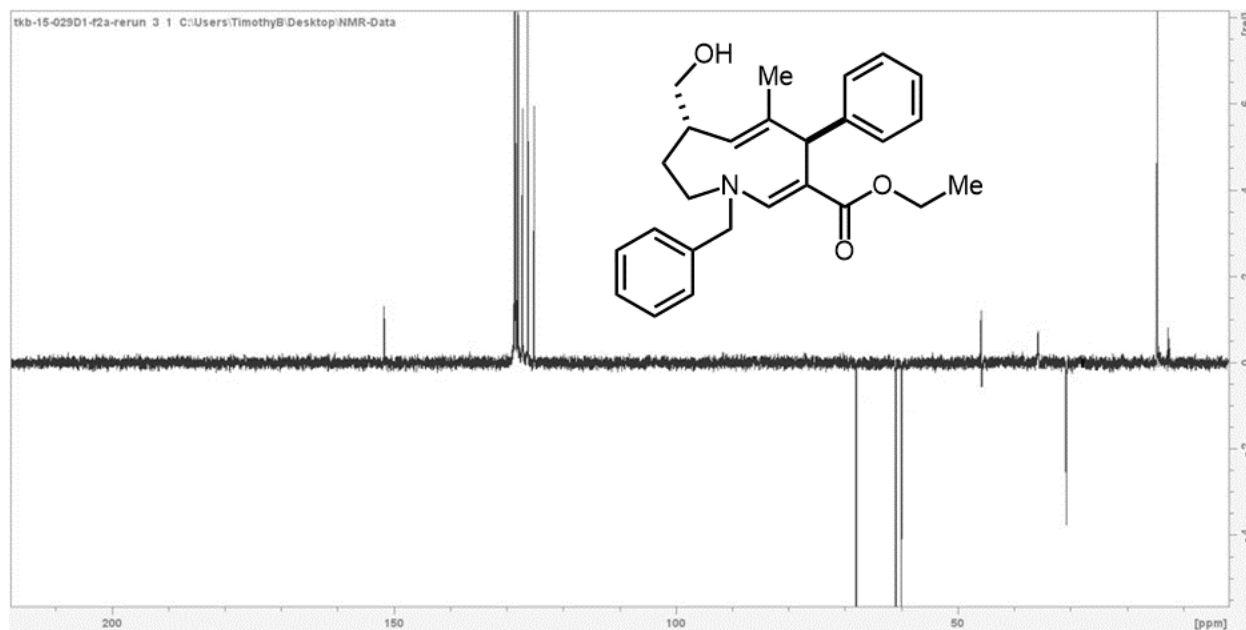

### Compound 8g

Prepared in 1.0 mmol scale using **General Procedure E**. Purification: Flash chromatography on silica eluting with hexane/acetone (90:10 to 60:40). Greenish-yellow oil. Yield = 413.8 mg, 95%, >99:1 dr. <sup>1</sup>H NMR (400 MHz, CDCl<sub>3</sub>) δ 7.78 (s, 1H), 7.30 (d, *J* = 4.4 Hz, 4H), 7.19 (ddd, *J* = 8.7, 5.1, 3.6 Hz, 1H), 6.74 – 6.66 (m, 2H), 6.62 (d, *J* = 8.3 Hz, 2H), 5.53 (s, 1H), 5.43 (dt, *J* = 7.7, 1.4 Hz, 1H), 4.32 – 4.12 (m, 5H), 3.78 (s, 3H), 3.58 (t, *J* = 8.9 Hz, 1H), 3.53 – 3.43 (m, 1H), 3.29 (d, *J* = 12.5 Hz, 1H), 2.40 (d, *J* = 14.6 Hz, 1H), 2.02 (s, 3H), 1.86 – 1.72 (m, 2H), 1.29 (t, *J* = 7.1 Hz, 3H), 1.09 (tt, *J* = 13.0, 2.5 Hz, 1H). <sup>13</sup>C NMR (101 MHz, CDCl<sub>3</sub>) δ 171.22, 158.89, 151.72, 146.22, 136.60, 129.29, 128.53, 128.41, 128.02, 127.66, 125.13, 113.91, 98.68, 68.09, 60.66, 60.05, 55.27, 45.93, 45.61, 35.83, 30.80, 14.64. HRMS-EI<sup>+</sup> (*m/z*): calc for C<sub>27</sub>H<sub>33</sub>NO<sub>4</sub> [M]<sup>+</sup> 435.2410, found 435.2415.



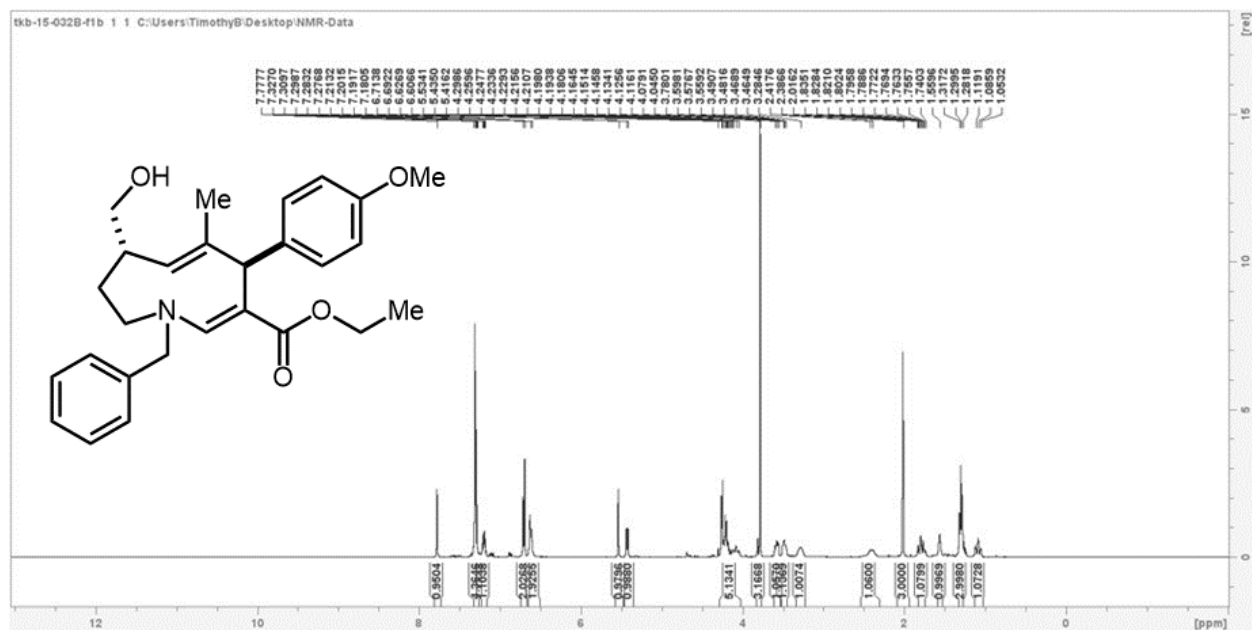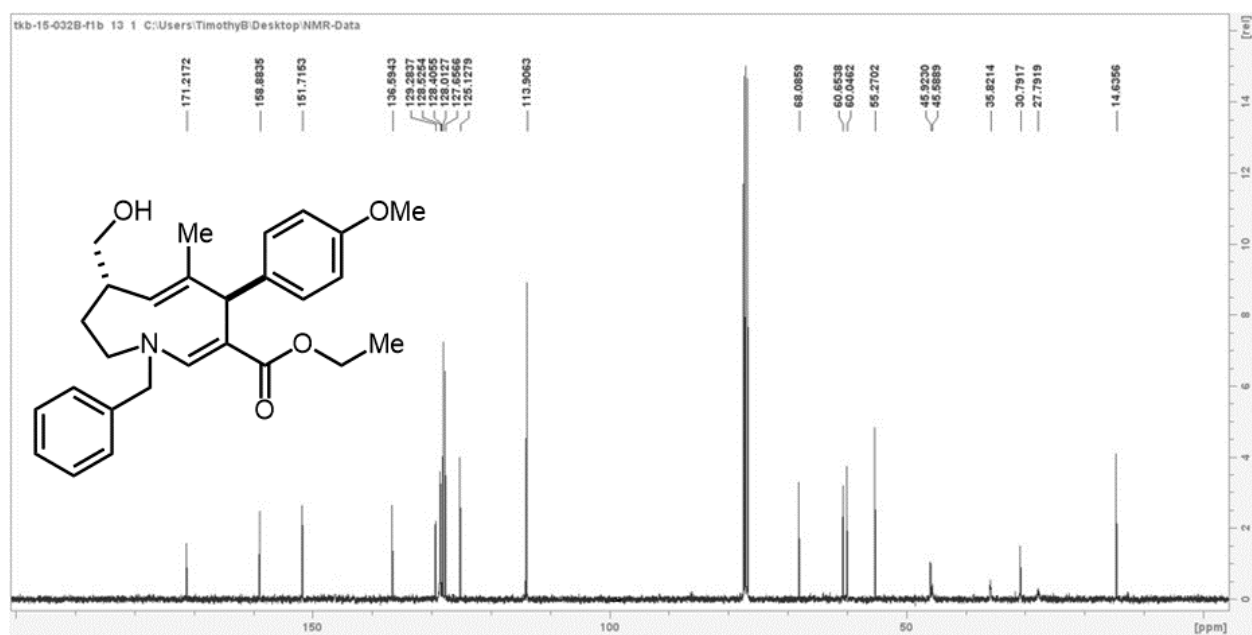

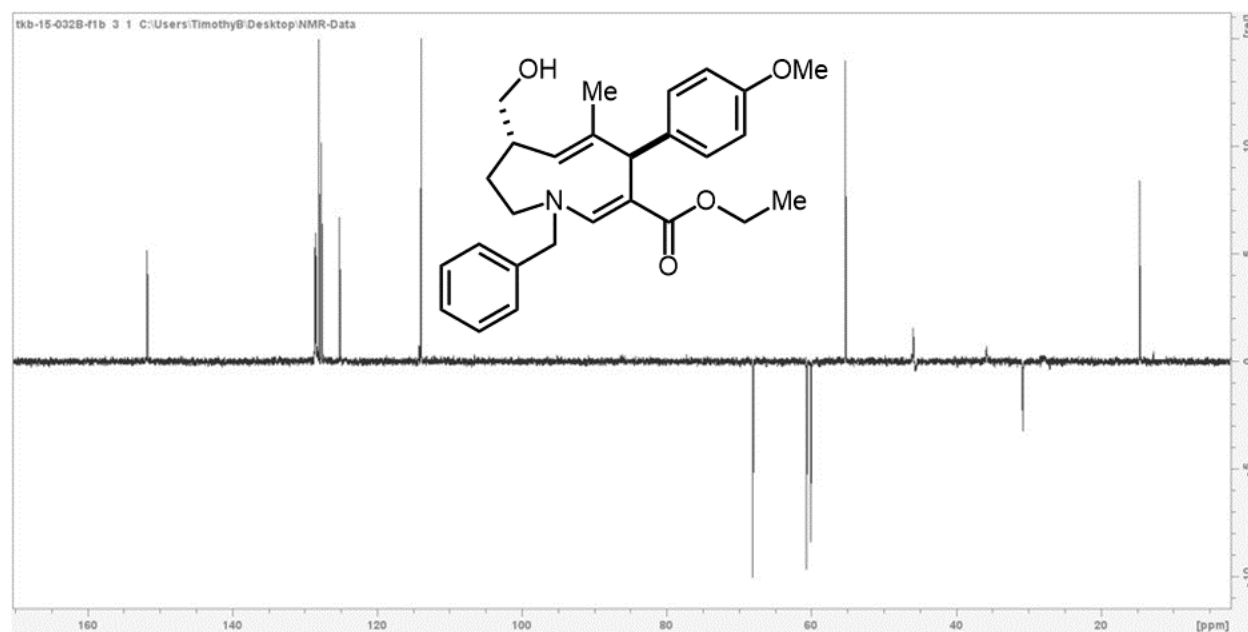

### Compound 8h

Prepared in 1.0 mmol scale using **General Procedure E**. Purification: Flash chromatography on silica eluting with hexane/acetone (90:10 to 70:30). Yellow oil. Yield = 390.2 mg, 93%, >99:1 dr. <sup>1</sup>H NMR (400 MHz, CDCl<sub>3</sub>) δ 7.32 – 7.20 (m, 6H), 6.98 (d, *J* = 7.8 Hz, 2H), 6.57 (d, *J* = 7.8 Hz, 2H), 5.54 (s, 1H), 5.43 (d, *J* = 7.5 Hz, 1H), 4.35 – 4.05 (m, 5H), 3.58 (dd, *J* = 10.3, 6.3 Hz, 1H), 3.48 (dd, *J* = 10.4, 6.3 Hz, 1H), 3.34 – 3.25 (m, 1H), 2.44 – 2.34 (m, 1H), 2.30 (s, 3H), 2.02 (s, 3H), 1.81 (tt, *J* = 13.0, 3.2 Hz, 1H), 1.61 – 1.50 (m, 1H), 1.29 (t, *J* = 6.9 Hz, 3H), 1.15 – 0.96 (m, 1H). <sup>13</sup>C NMR (101 MHz, CDCl<sub>3</sub>) δ 171.23, 136.99, 136.63, 134.27, 129.20, 128.55, 128.41, 128.03, 127.95, 126.31, 125.16, 98.54, 68.10, 60.85, 60.04, 45.91, 35.80, 30.79, 27.86, 21.01, 14.65, 13.41. **HRMS-EI<sup>+</sup>** (*m/z*): calc for C<sub>27</sub>H<sub>33</sub>NO<sub>3</sub> [M]<sup>+</sup> 419.2460, found 419.2466.

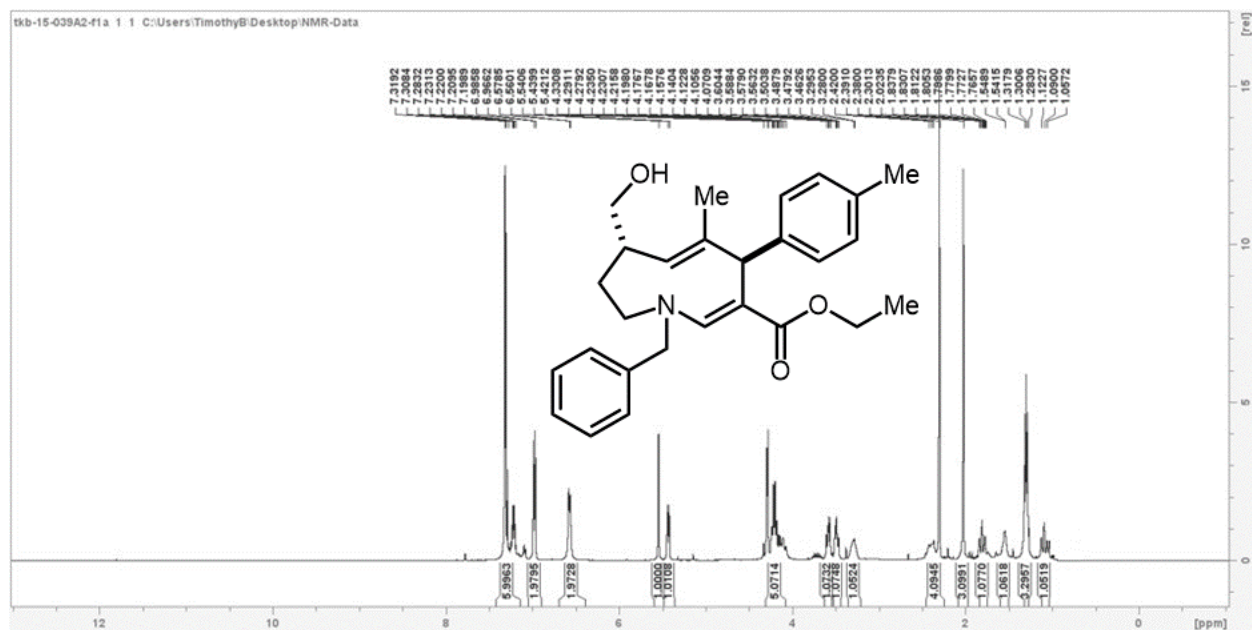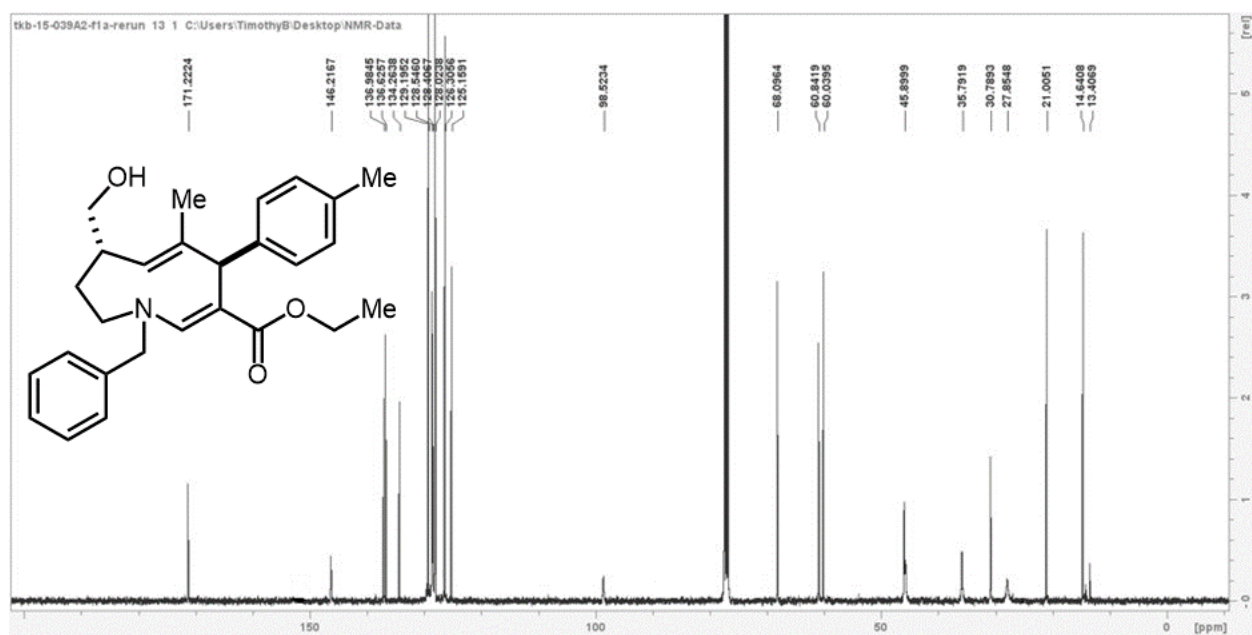

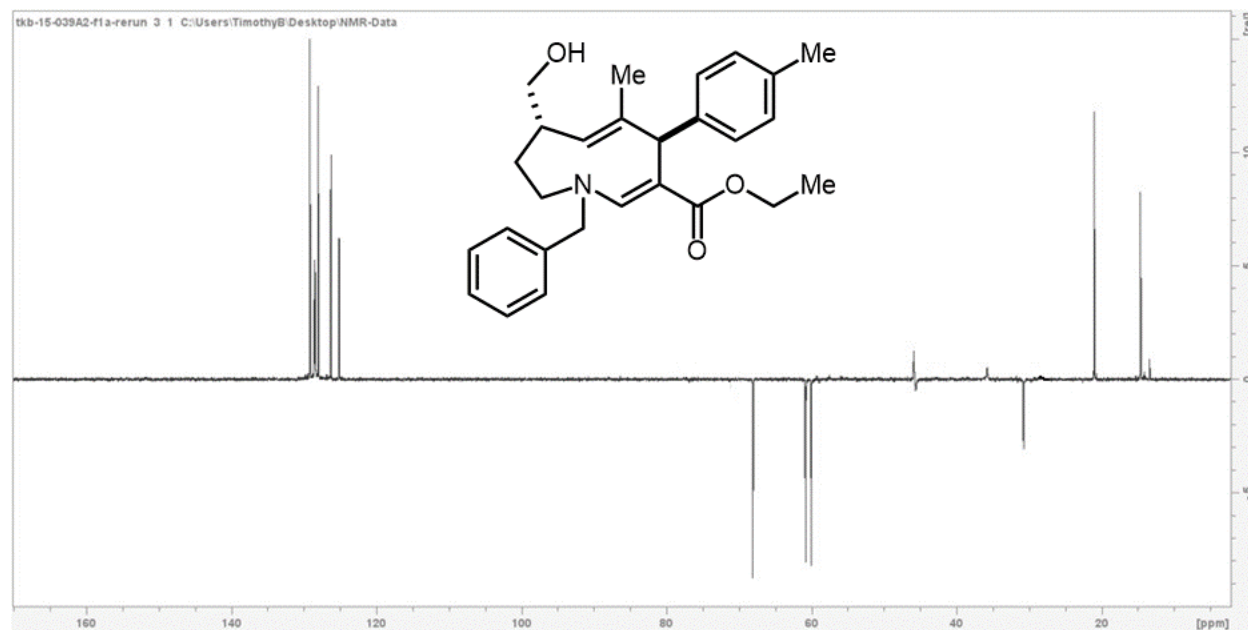

### Compound 8i

Prepared in 1.0 mmol scale using **General Procedure E**. Purification: Flash chromatography on silica eluting with hexane/acetone (90:10 to 70:30). Yellow oil. Yield = 395.9 mg, 90%, >99:1 dr.  $^1\text{H}$  NMR (400 MHz,  $\text{CDCl}_3$ )  $\delta$  7.72 (s, 1H), 7.32 (q,  $J = 2.4$  Hz, 4H), 7.28 – 7.20 (m, 1H), 7.24 – 7.05 (m, 2H), 6.55 (d,  $J = 8.0$  Hz, 2H), 5.54 (s, 1H), 5.43 (d,  $J = 7.6$  Hz, 1H), 4.35 – 4.14 (m, 4H), 3.62 – 3.58 (m, 1H), 3.50 (br s, 1H), 3.32 (br s, 1H), 2.35 (d,  $J = 15.2$  Hz, 1H), 2.03 (s, 1H), 1.83 (tt,  $J = 13.0, 3.1$  Hz, 1H), 1.35 – 1.21 (m, 5H), 1.13 – 1.04 (m, 1H).  $^{13}\text{C}$  NMR (101 MHz,  $\text{CDCl}_3$ )  $\delta$  171.01, 151.54, 146.09, 136.56, 135.92, 133.01, 128.66, 128.60, 128.37, 128.07, 127.61, 125.28, 68.09, 60.48, 60.17, 45.94, 35.84, 30.81, 29.71, 14.63. **HRMS-EI<sup>+</sup>** ( $m/z$ ): calc for  $\text{C}_{26}\text{H}_{30}\text{ClNO}_3$   $[\text{M}]^+$  439.1914, found 439.1917.

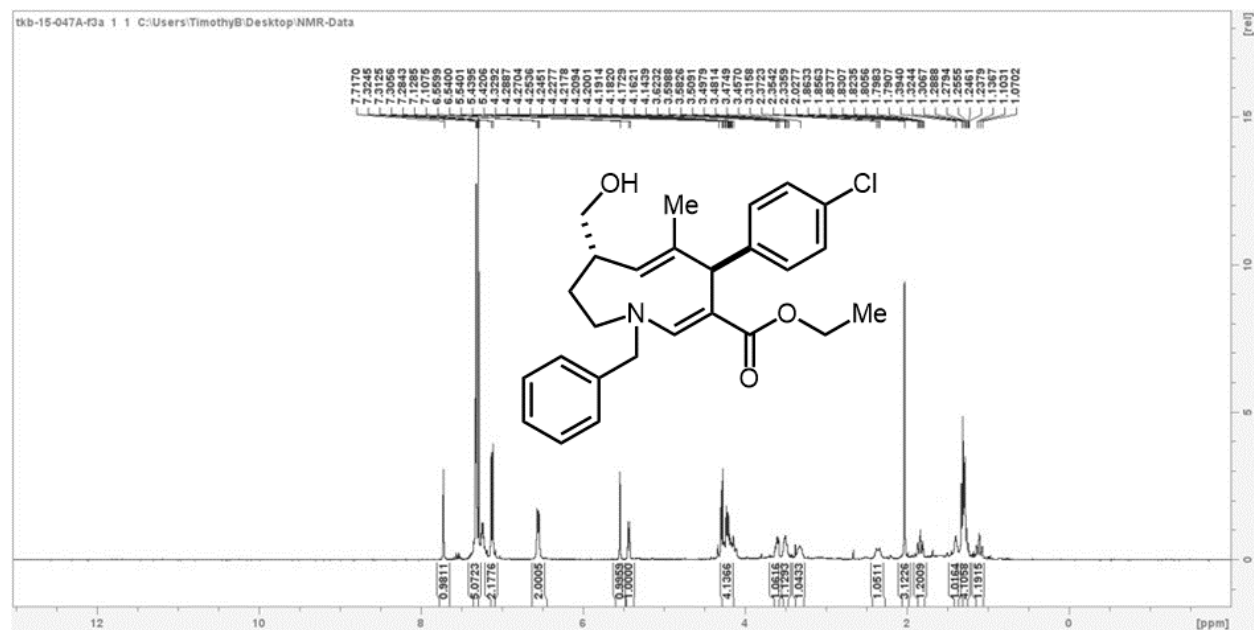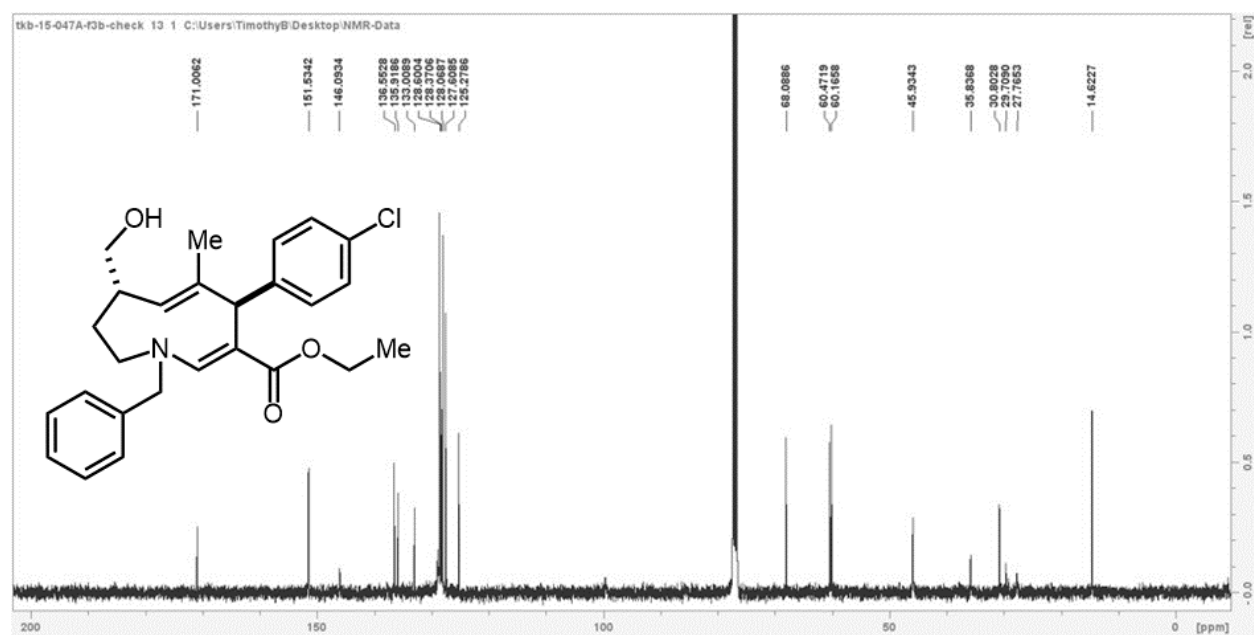

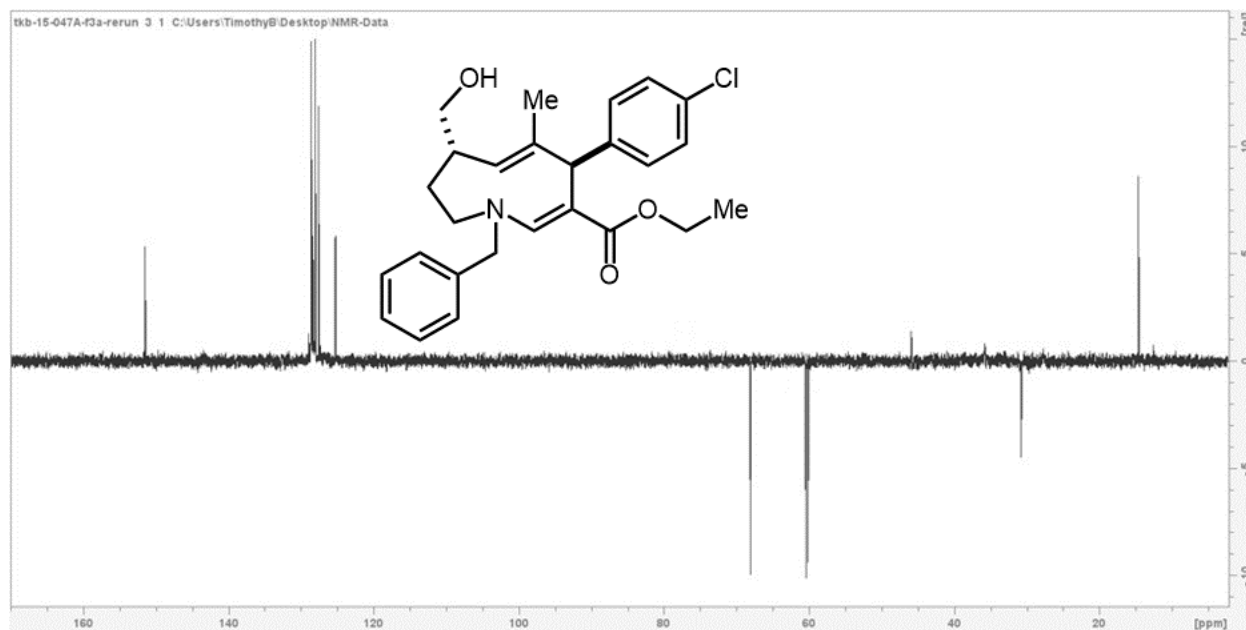

### Compound 8j

Prepared in 1.0 mmol scale using **General Procedure E**. Purification: Flash chromatography on silica eluting with hexane/acetone (90:10 to 70:30). Yellow oil. Yield = 368.4 mg, 87%, >99:1 dr. <sup>1</sup>H NMR (400 MHz, CDCl<sub>3</sub>) δ 7.65 (s, 1H), 7.22 – 7.10 (m, 5H), 6.77 – 6.73 (m, 2H), 6.51 (dd, *J* = 8.4, 5.3 Hz, 2H), 5.45 (s, 1H), 5.34 (d, *J* = 7.6 Hz, 1H), 4.26 – 4.08 (m, 5H), 3.50 (dd, *J* = 10.1, 6.3 Hz, 1H), 3.44 – 3.33 (m, 2H), 2.28 (d, *J* = 15.0 Hz, 1H), 1.93 (s, 3H), 1.73 (tt, *J* = 13.0, 3.1 Hz, 1H), 1.25 – 1.10 (m, 4H), 1.10 – 0.95 (m, 1H). <sup>13</sup>C NMR (101 MHz, CDCl<sub>3</sub>) δ 171.06, 163.23, 160.79, 151.58, 146.13, 136.55, 133.00, 128.59, 128.38, 128.04, 127.94, 127.86, 126.37, 125.22, 115.48, 115.27, 99.43, 68.08, 60.46, 60.14, 45.94, 35.84, 30.81, 14.63, 12.59. **HRMS-EI<sup>+</sup>** (*m/z*): calc for C<sub>26</sub>H<sub>30</sub>FNO<sub>3</sub> [M]<sup>+</sup> 423.2210, found 423.2215.

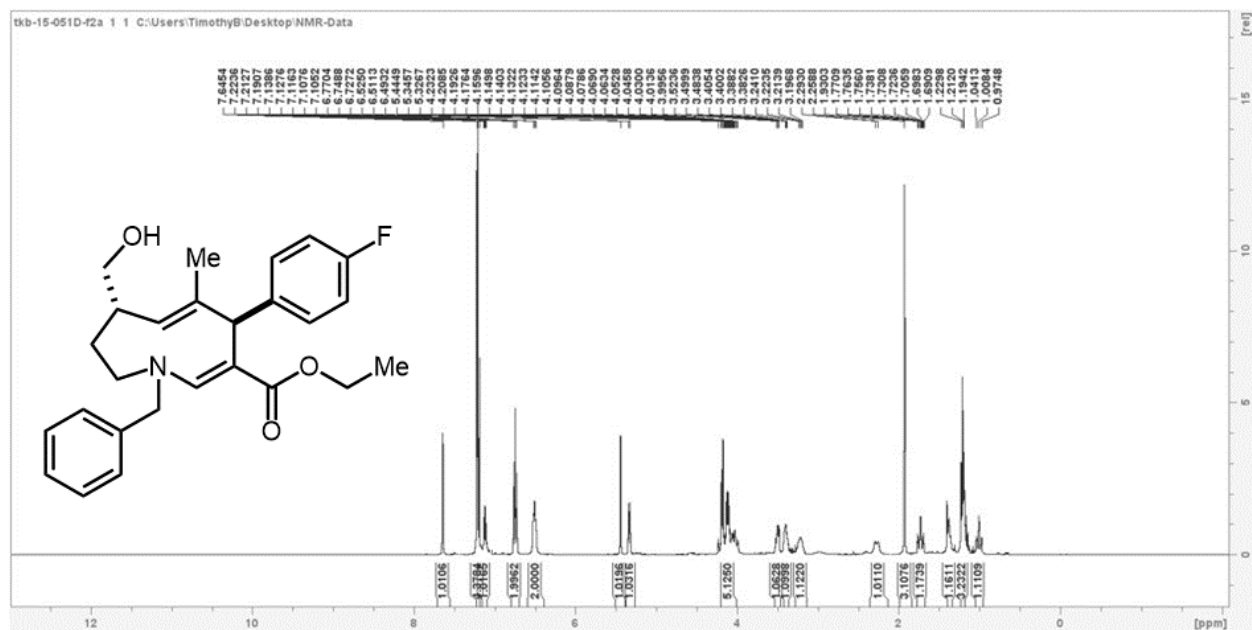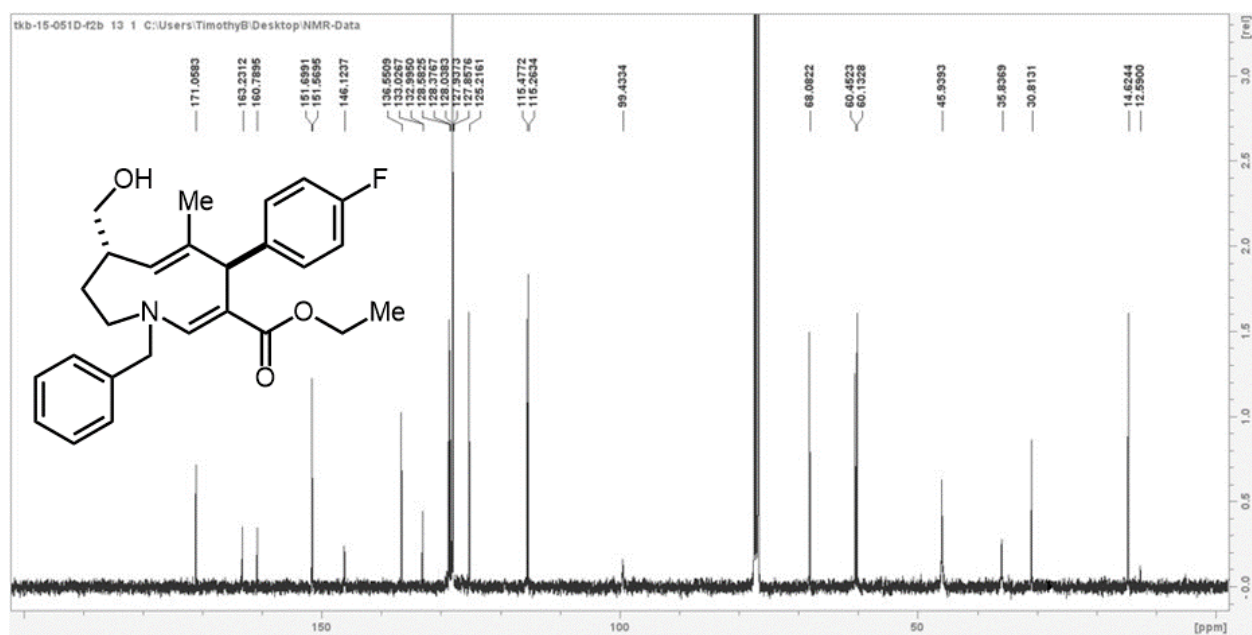

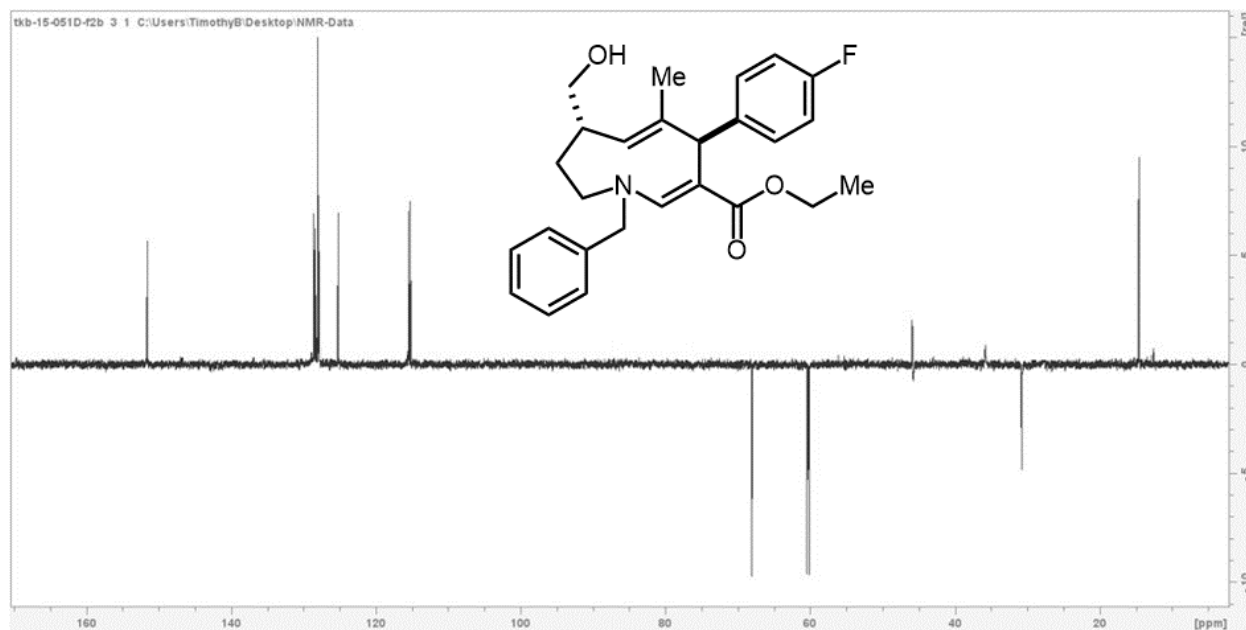**<sup>19</sup>F NMR**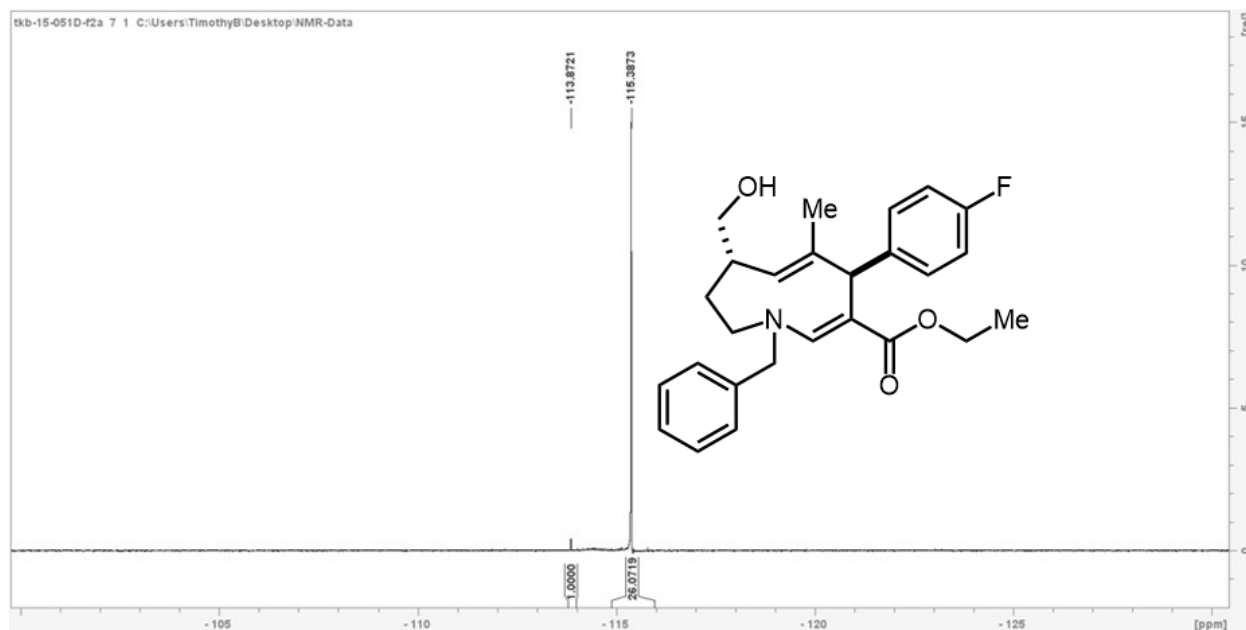**Compound 8k**

Prepared in 1.0 mmol scale using **General Procedure E**. Purification: Flash chromatography on silica eluting with hexane/acetone (90:10 to 60:40). Amorphous solid. Yield = 382.2 mg, 85%, >99:1 dr. <sup>1</sup>H NMR (400 MHz, CDCl<sub>3</sub>) δ 7.59 (s, 1H), 7.34 – 7.21 (m, 5H), 6.70 (s, 4H), 5.49 (s, 1H), 5.39 (d, *J* = 7.6 Hz, 1H), 4.18 (q, *J* = 7.1 Hz, 2H), 3.99 – 3.94 (m, 1H), 3.79 (s, 3H), 3.54 (dd, *J* = 10.3, 6.4 Hz, 1H), 3.45 (dd, *J* = 10.1, 6.1 Hz, 1H), 3.40 – 3.23 (m, 1H), 3.22 – 3.06 (m,



2H), 2.55 (td,  $J = 6.5, 3.2$  Hz, 2H), 2.27 (s, 1H), 1.96 (s, 3H), 1.72 (tt,  $J = 13.0, 3.2$  Hz, 1H), 1.54 (br s, 1H), 1.27 (t,  $J = 7.1$  Hz, 3H), 1.16 – 0.96 (m, 1H).  $^{13}\text{C}$  NMR (101 MHz,  $\text{CDCl}_3$ )  $\delta$  171.31, 158.04, 150.95, 146.10, 136.71, 130.37, 129.71, 128.46, 128.42, 128.01, 125.07, 113.92, 97.84, 68.05, 59.95, 59.28, 55.20, 46.68, 45.73, 35.92, 30.85, 15.35, 14.62. **HRMS- $\text{EI}^+$**  ( $m/z$ ): calc for  $\text{C}_{28}\text{H}_{35}\text{NO}_4$   $[\text{M}]^+$  449.2566, found 449.2569.

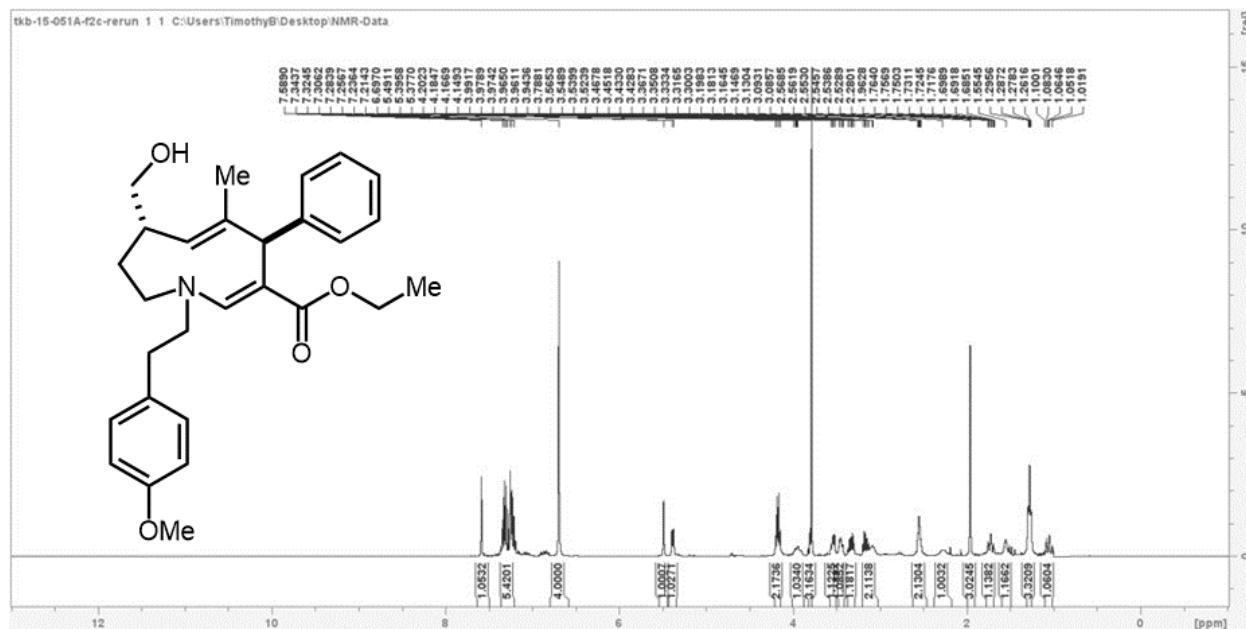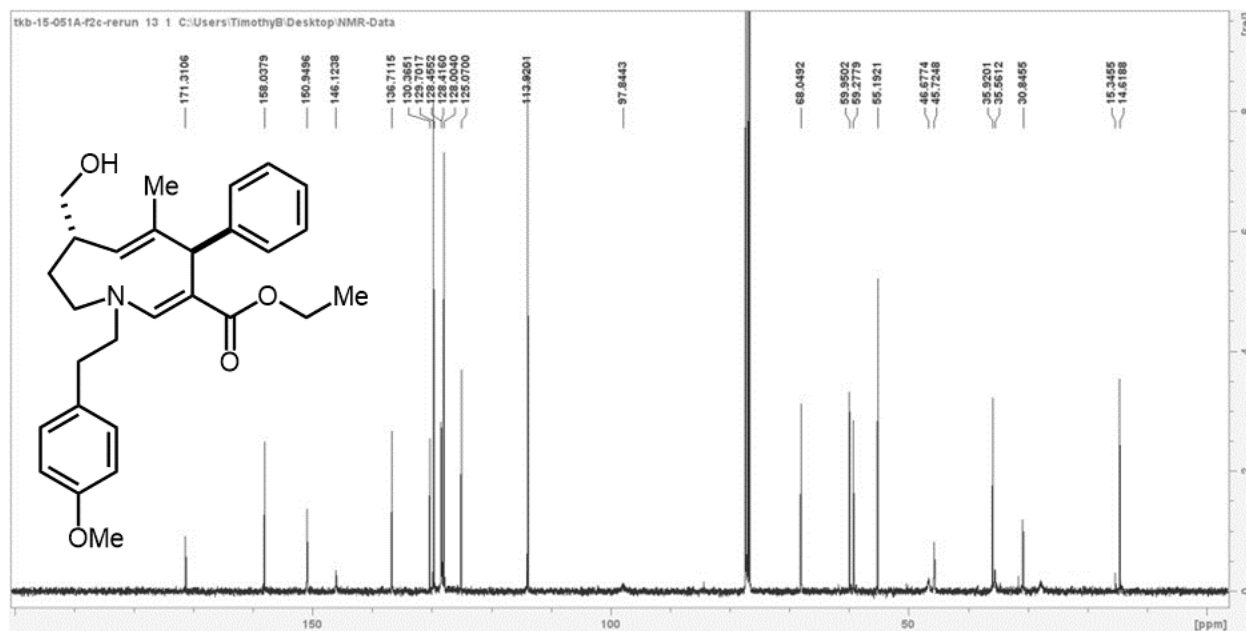

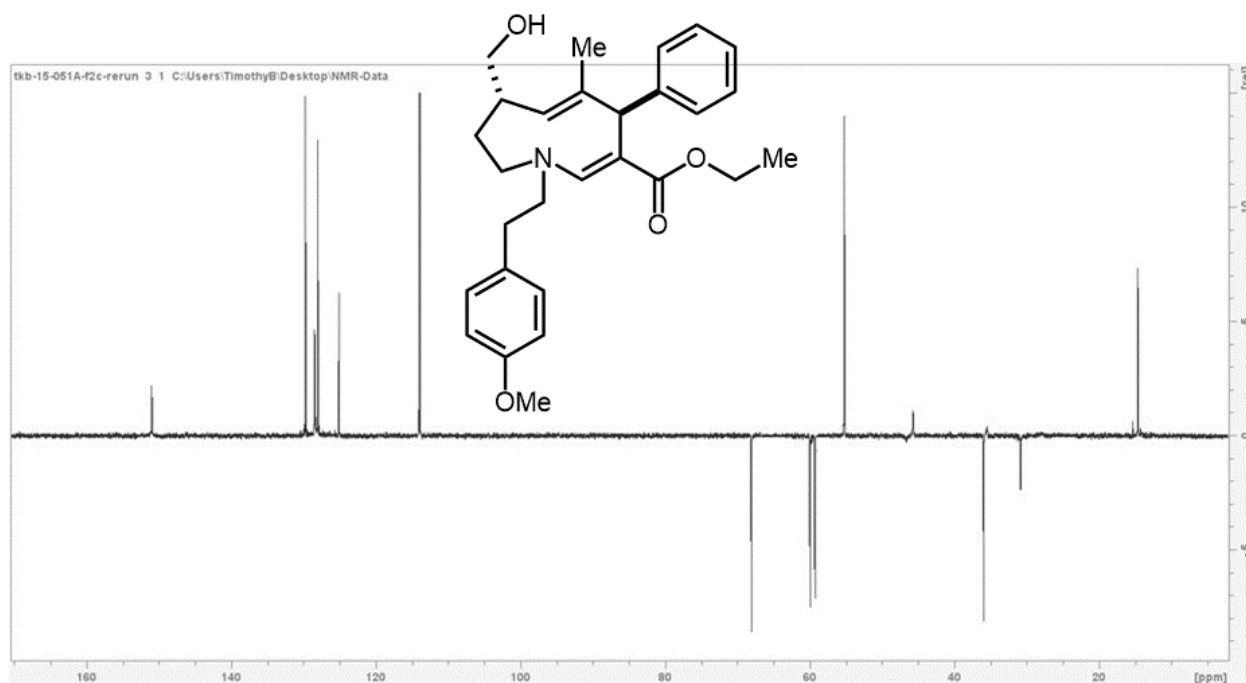

### Compound 8l

Prepared in 1.0 mmol scale using **General Procedure E**. Purification: Flash chromatography on silica eluting with hexane/acetone (90:10 to 75:25). Greenish-yellow oil. Yield = 312.8 mg, 88%, >99:1 dr.  $^1\text{H}$  NMR (400 MHz,  $\text{CDCl}_3$ )  $\delta$  7.64 (s, 1H), 7.28 – 7.25 (m, 4H), 7.16 – 7.11 (m, 1H), 5.60 (ddt,  $J$  = 17.1, 9.9, 4.8 Hz, 1H), 5.49 (s, 1H), 5.42 (dt,  $J$  = 7.6, 1.4 Hz, 1H), 4.94 (dd,  $J$  = 10.2, 1.8 Hz, 1H), 4.59 (dd,  $J$  = 11.9, 8.4 Hz, 1H), 4.18 (pd,  $J$  = 8.4, 4.2 Hz, 2H), 4.03 (t,  $J$  = 13.8 Hz, 1H), 3.77 – 3.67 (m, 1H), 3.71 – 3.60 (m, 1H), 3.58 (dd,  $J$  = 10.3, 6.3 Hz, 1H), 3.49 (dd,  $J$  = 10.4, 6.3 Hz, 1H), 3.18 (br s, 1H), 2.48 (d,  $J$  = 15.1 Hz, 1H), 1.99 (s, 3H), 1.80 (tt,  $J$  = 13.0, 3.1 Hz, 1H), 1.57 (br. s, 1H), 1.28 (q,  $J$  = 6.8 Hz, 3H), 1.12 (tt,  $J$  = 13.3, 2.7 Hz, 1H).  $^{13}\text{C}$  NMR (101 MHz,  $\text{CDCl}_3$ )  $\delta$  171.25, 151.18, 145.94, 136.68, 133.61, 128.37, 128.28, 127.96, 125.11, 116.42, 68.08, 60.01, 59.58, 45.74, 31.60, 30.91, 22.66, 14.61. **HRMS-EI<sup>+</sup>** ( $m/z$ ): calc for  $\text{C}_{22}\text{H}_{29}\text{NO}_3$   $[\text{M}]^+$  355.2147, found 355.2153.

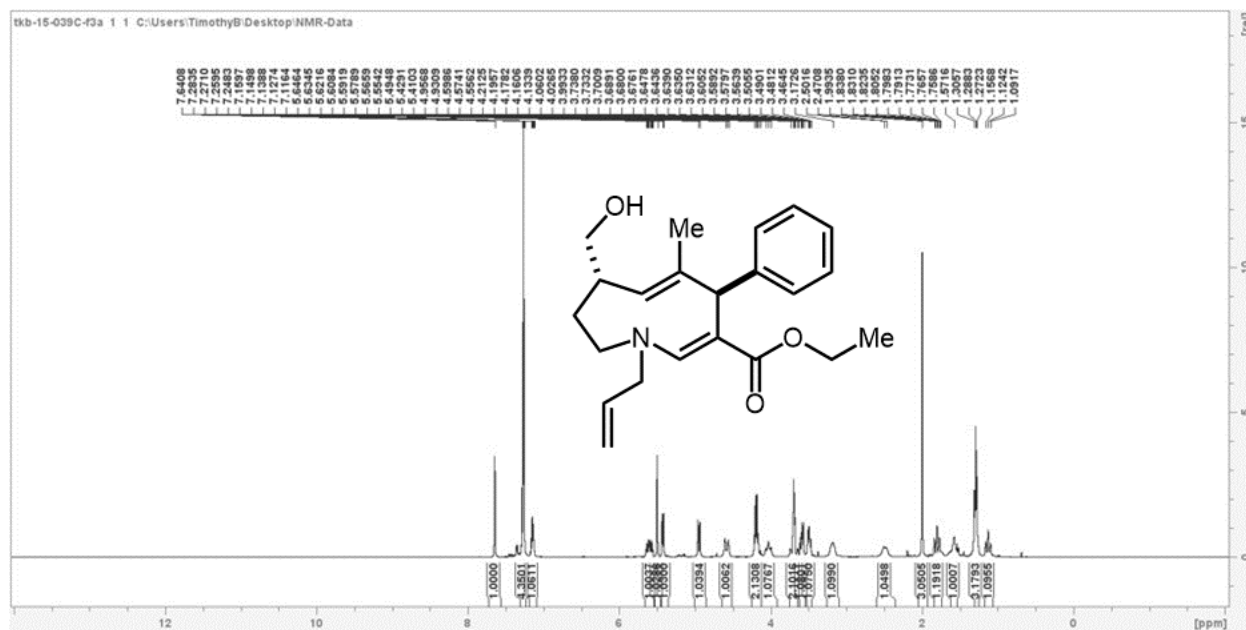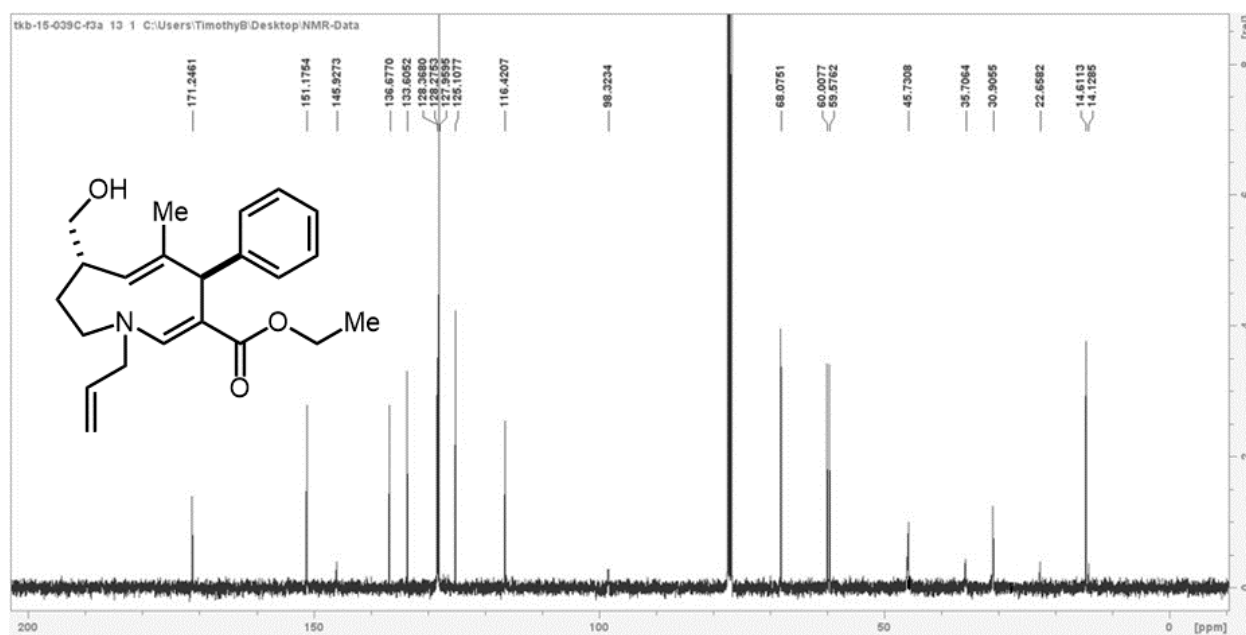

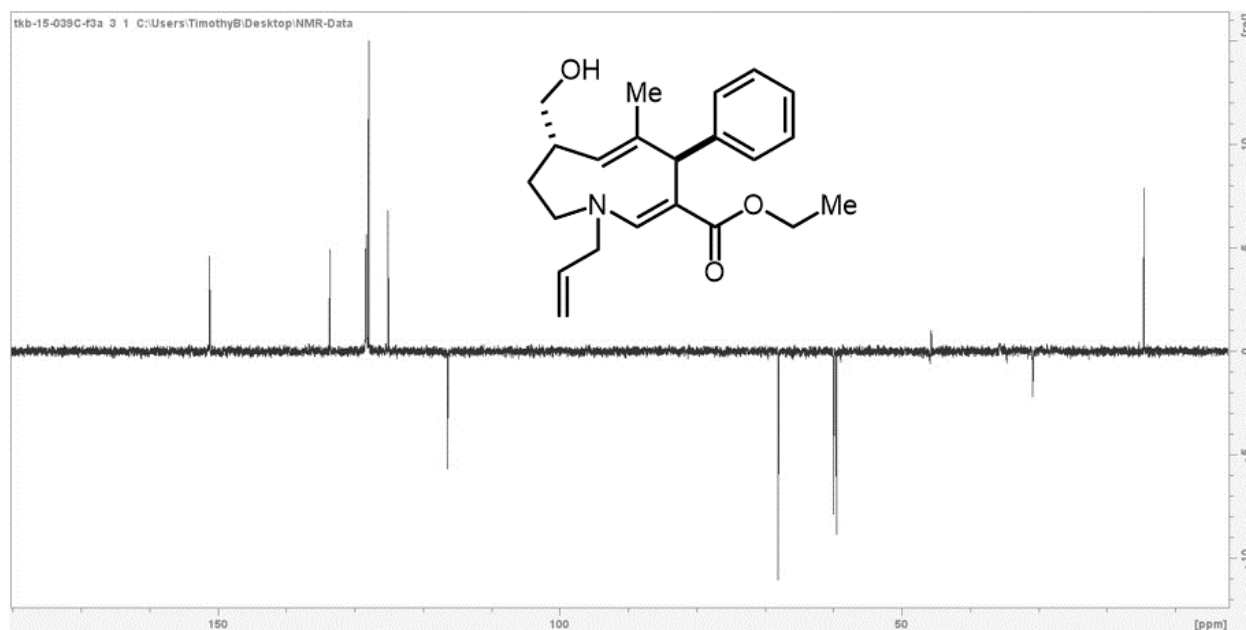

### Compound 8m

Prepared in 1.0 mmol scale using **General Procedure E**. Purification: Flash chromatography on silica eluting with hexane/acetone (90:10 to 75:25). Greenish-yellow oil. Yield = 349.5 mg, 85%, >99:1 dr. <sup>1</sup>H NMR (400 MHz, CDCl<sub>3</sub>) δ 7.69 (s, 1H), 7.26 (d, *J* = 4.4 Hz, 4H), 7.14 (p, *J* = 4.3 Hz, 1H), 5.65 – 5.51 (m, 2H), 5.41 (d, *J* = 7.5 Hz, 1H), 4.93 (dq, *J* = 10.4, 1.6 Hz, 1H), 4.56 (d, *J* = 17.1 Hz, 1H), 4.20 (dqt, *J* = 10.6, 6.9, 3.3 Hz, 2H), 3.99 (t, *J* = 13.9 Hz, 1H), 3.79 – 3.55 (m, 4H), 3.49 (q, *J* = 5.6 Hz, 1H), 3.27 – 3.15 (m, 1H), 2.38 (d, *J* = 15.0 Hz, 1H), 2.18 (dd, *J* = 9.3, 6.5 Hz, 2H), 1.76 – 1.63 (m, 2H), 1.57 (s, 1H), 1.33 – 1.21 (m, 9H), 1.11 (tt, *J* = 13.1, 2.5 Hz, 1H), 0.93 – 0.81 (m, 3H). <sup>13</sup>C NMR (101 MHz, CDCl<sub>3</sub>) δ 171.32, 151.39, 146.65, 141.77, 133.58, 128.36, 127.96, 127.86, 125.07, 116.36, 68.21, 60.00, 59.52, 45.74, 44.09, 35.33, 31.91, 30.67, 30.33, 22.59, 14.63, 14.14. **HRMS-EI<sup>+</sup>** (*m/z*): calc for C<sub>26</sub>H<sub>37</sub>NO<sub>3</sub> [M]<sup>+</sup> 411.2773, found 411.2777.

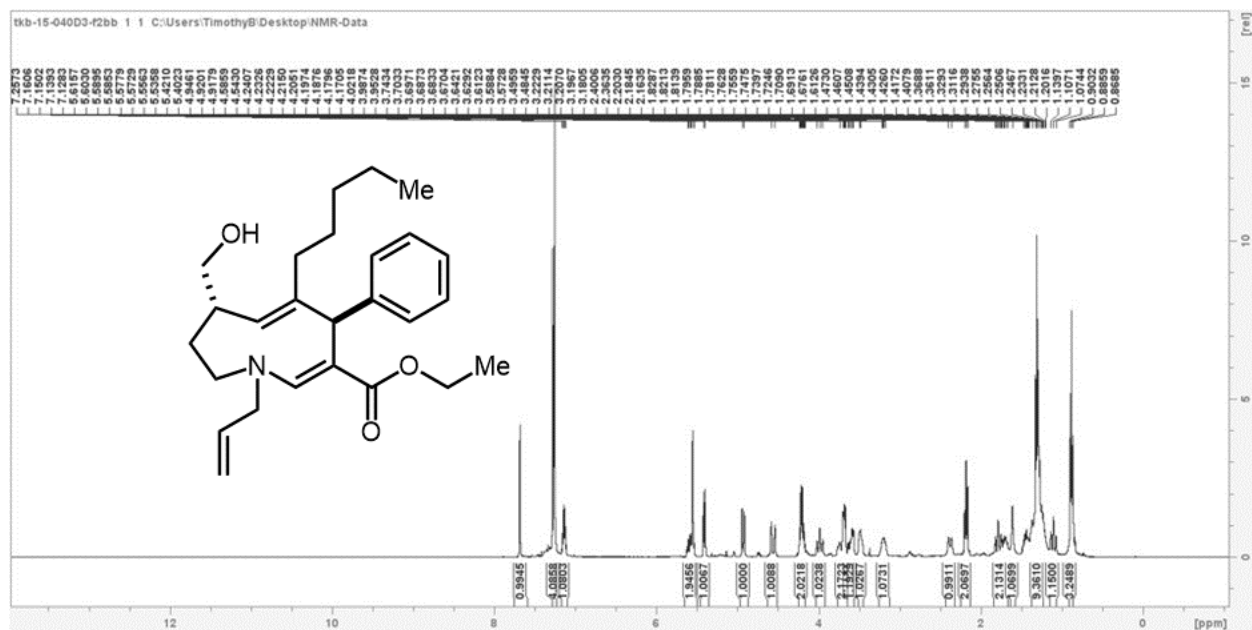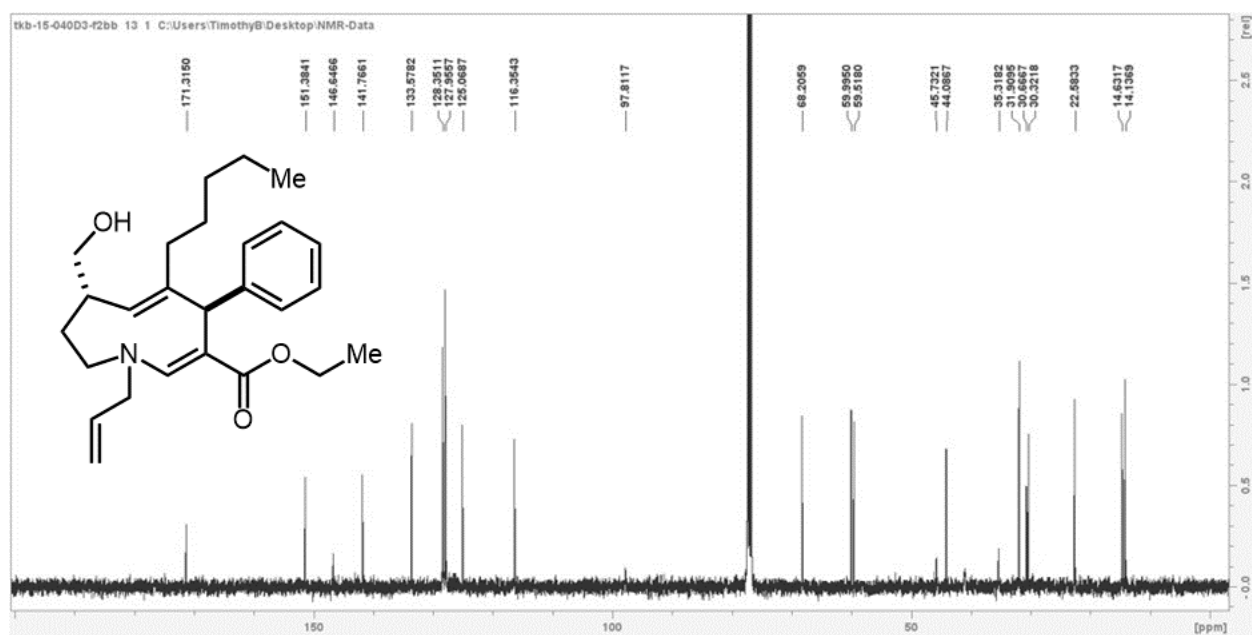

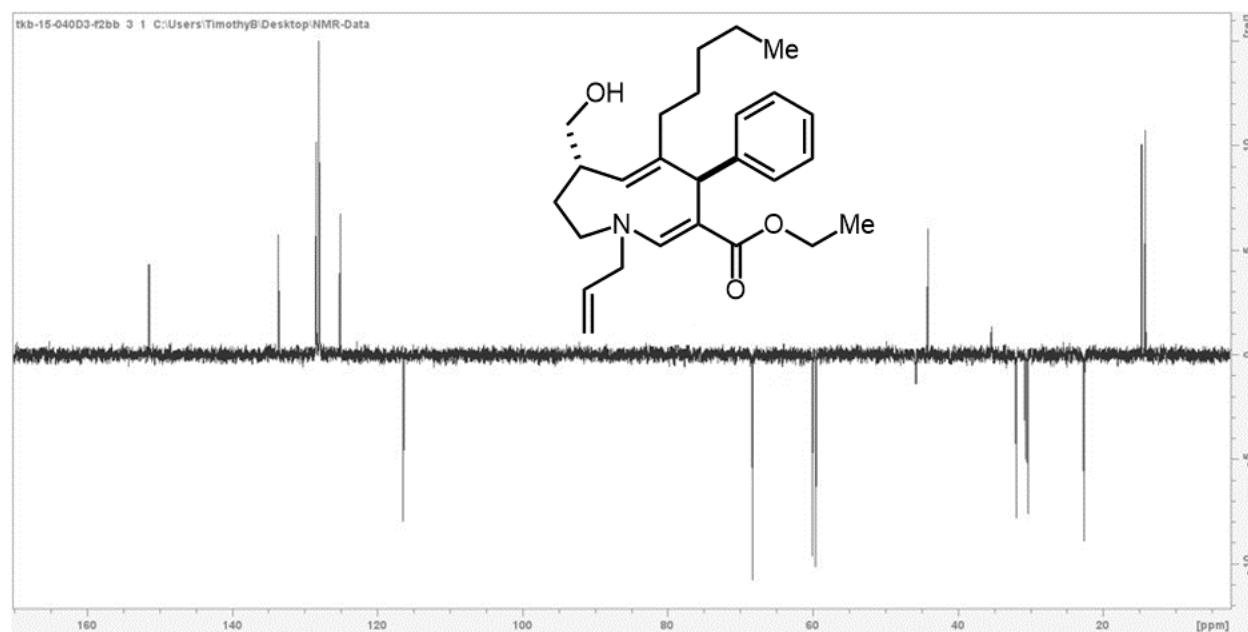

### Compound 8n

Prepared in 1.0 mmol scale using **General Procedure E**. Purification: Flash chromatography on silica eluting with hexane/acetone (90:10 to 70:30). Yellowish oil. Yield = 296.5 mg, 90%, >99:1 dr. <sup>1</sup>H NMR (400 MHz, CDCl<sub>3</sub>) δ 7.97 (s, 1H), 7.41 – 7.23 (m, 4H), 7.14 (ddt, *J* = 9.0, 7.0, 1.7 Hz, 1H), 6.19 (dd, *J* = 12.1, 6.6 Hz, 1H), 5.57 (d, *J* = 6.6 Hz, 1H), 5.47 (dd, *J* = 12.1, 8.0 Hz, 1H), 3.74 – 3.54 (m, 5H), 3.49 (dd, *J* = 10.4, 6.4 Hz, 1H), 3.39 (hept, *J* = 6.7 Hz, 1H), 3.13 (t, *J* = 9.6 Hz, 1H), 2.63 (d, *J* = 15.2 Hz, 1H), 1.84 – 1.69 (m, 2H), 1.33 – 1.14 (m, 6H), 1.07 (tt, *J* = 12.9, 2.6 Hz, 1H). <sup>13</sup>C NMR (101 MHz, CDCl<sub>3</sub>) δ 171.76, 148.29, 146.33, 131.33, 129.00, 128.17, 126.85, 125.27, 95.06, 67.48, 57.93, 51.47, 44.62, 41.14, 35.23, 32.78, 22.82, 22.44. **HRMS-EI<sup>+</sup>** (*m/z*): calc for C<sub>20</sub>H<sub>27</sub>NO<sub>3</sub> [M]<sup>+</sup> 329.1991, found 329.1996.

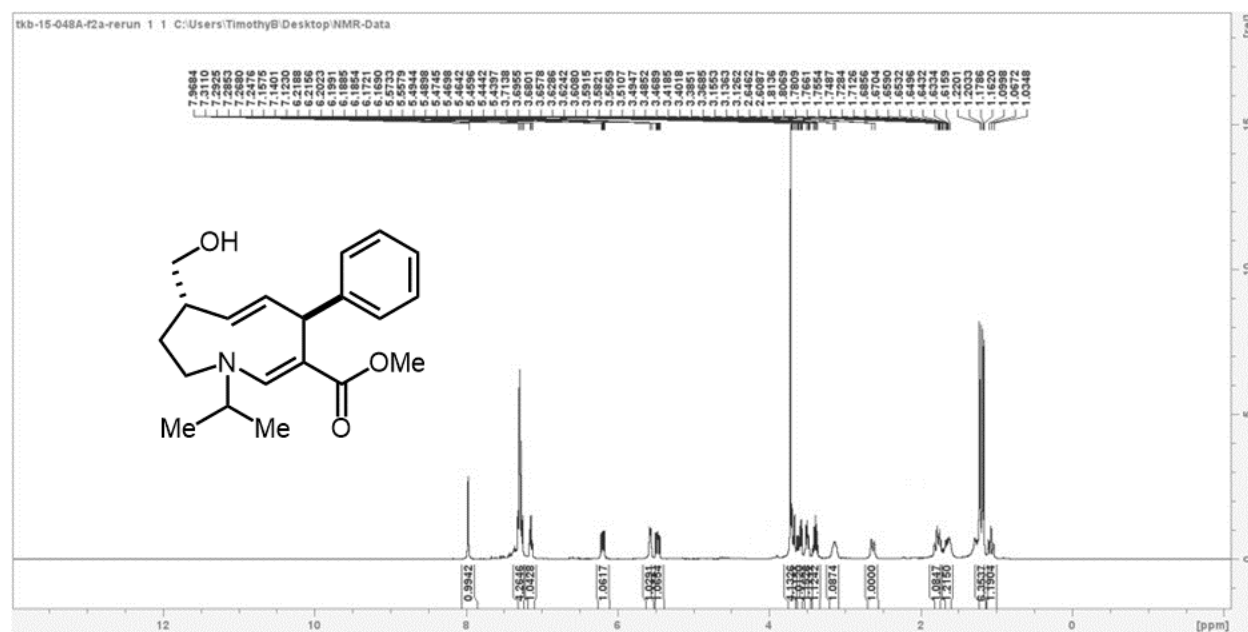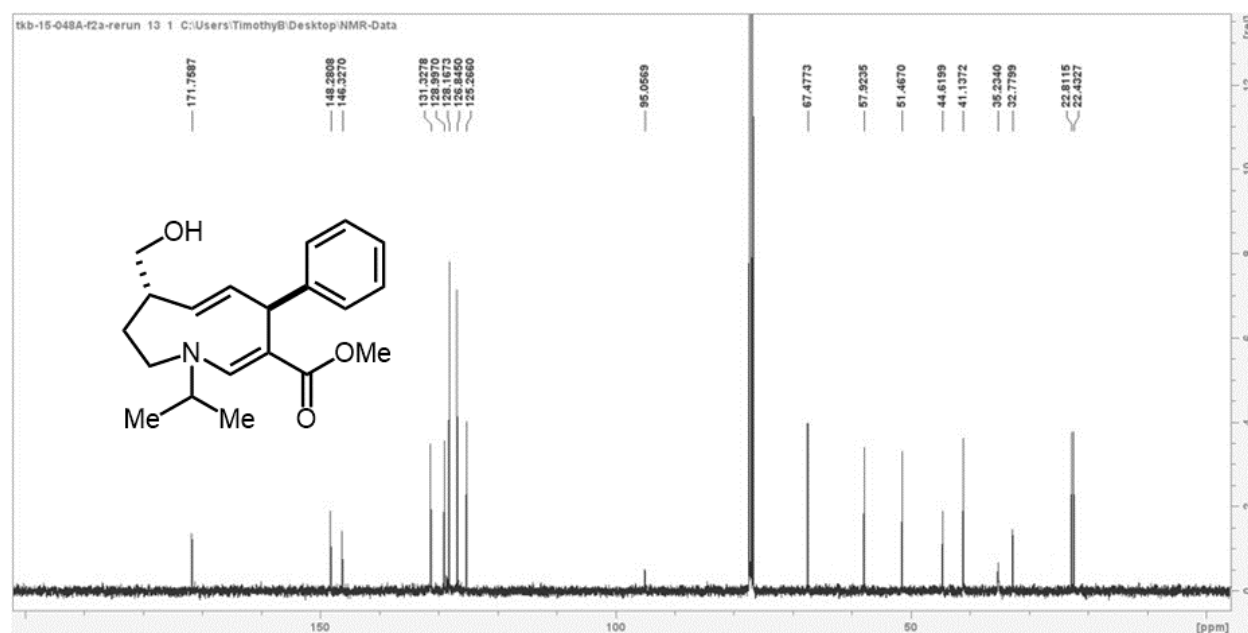

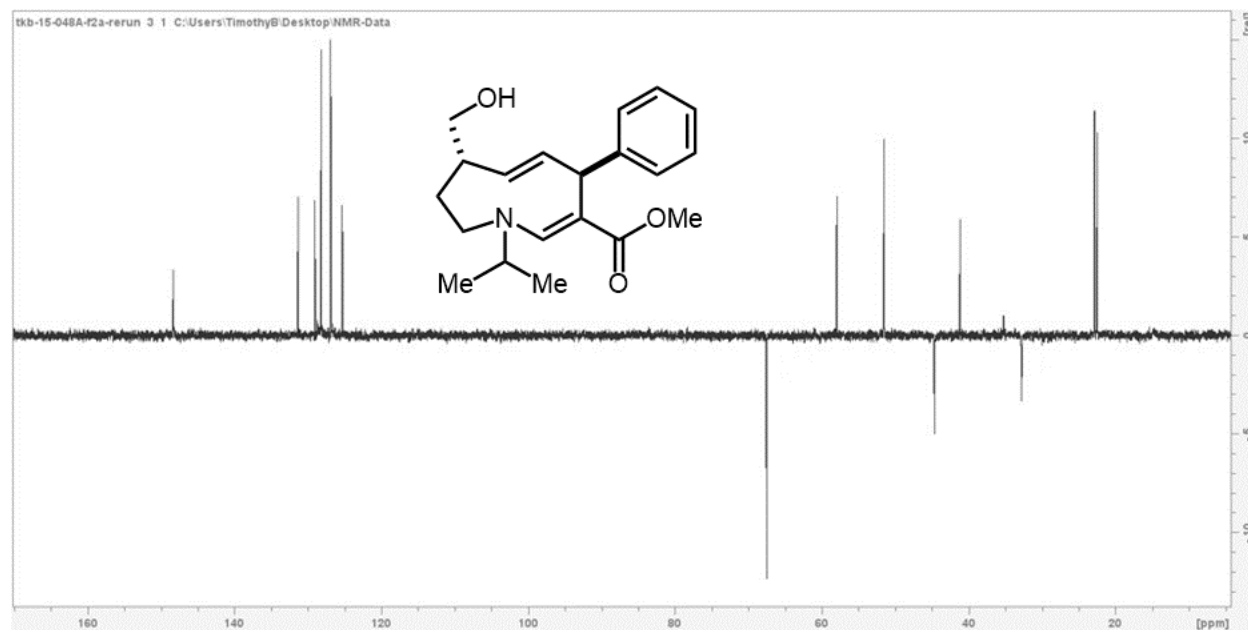

### Compound 8o

Prepared in 1.0 mmol scale using **General Procedure E**. Purification: Flash chromatography on silica eluting with hexane/acetone (90:10 to 50:50). Yellowish oil. Yield = 429.8 mg, 85%, >99:1 dr. <sup>1</sup>H NMR (400 MHz, CDCl<sub>3</sub>) δ 7.67 (s, 1H), 7.30 – 7.17 (m, 5H), 7.08 (t, *J* = 7.9 Hz, 1H), 6.73 (dd, *J* = 8.3, 2.6 Hz, 1H), 6.58 (s, 1H), 6.36 (d, *J* = 7.5 Hz, 1H), 5.52 (s, 1H), 5.39 (d, *J* = 7.4 Hz, 1H), 3.94 (t, *J* = 13.9 Hz, 1H), 3.79 (s, 3H), 3.74 (s, 3H), 3.60 – 3.51 (m, 1H), 3.46 (d, *J* = 5.6 Hz, 1H), 3.36 (dt, *J* = 14.1, 7.1 Hz, 1H), 3.26 – 3.07 (m, 2H), 2.62 – 2.51 (m, 2H), 2.28 (d, *J* = 15.1 Hz, 1H), 2.24 – 2.08 (m, 2H), 1.80 – 1.60 (m, 3H), 1.37 – 1.22 (m, 9H), 1.08 (tt, *J* = 13.1, 2.5 Hz, 1H), 0.87 (t, 3H). <sup>13</sup>C NMR (101 MHz, CDCl<sub>3</sub>) δ 171.65, 159.69, 150.99, 141.81, 139.77, 129.58, 128.31, 128.01, 127.83, 125.07, 121.24, 114.44, 111.49, 68.18, 59.02, 55.16, 51.40, 44.26, 36.82, 35.22, 31.77, 30.73, 30.51, 29.33, 22.69, 14.11. **HRMS-EI<sup>+</sup>** (*m/z*): calc for C<sub>32</sub>H<sub>43</sub>NO<sub>4</sub> [M]<sup>+</sup> 505.3192, found 505.3197.



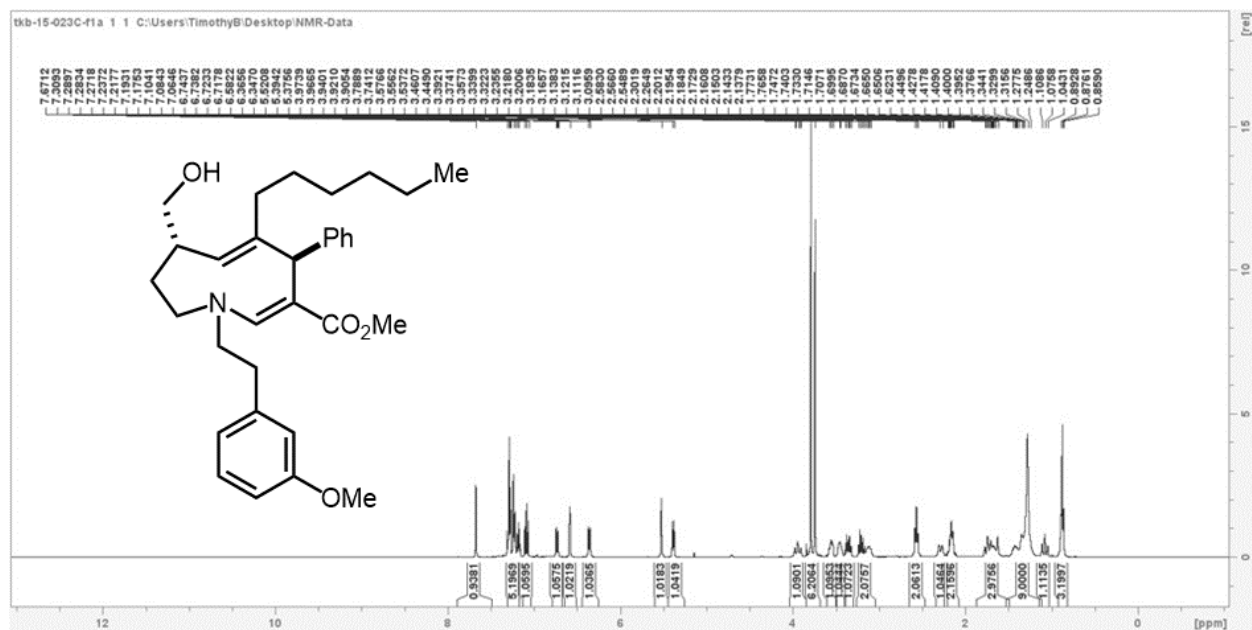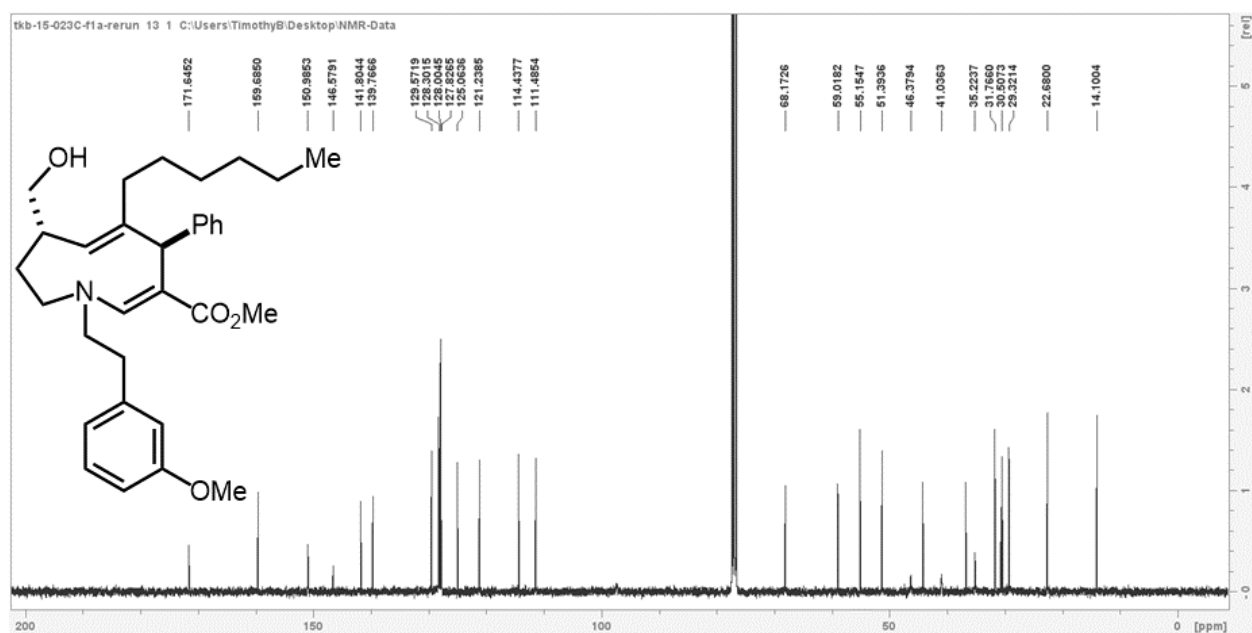

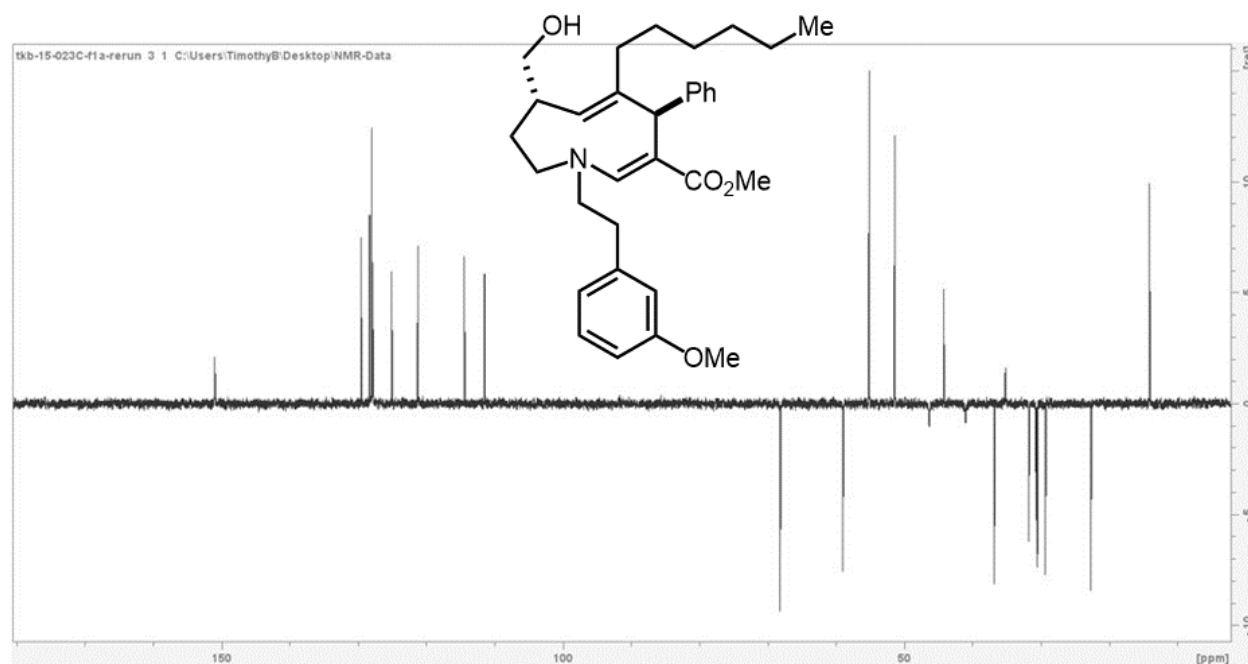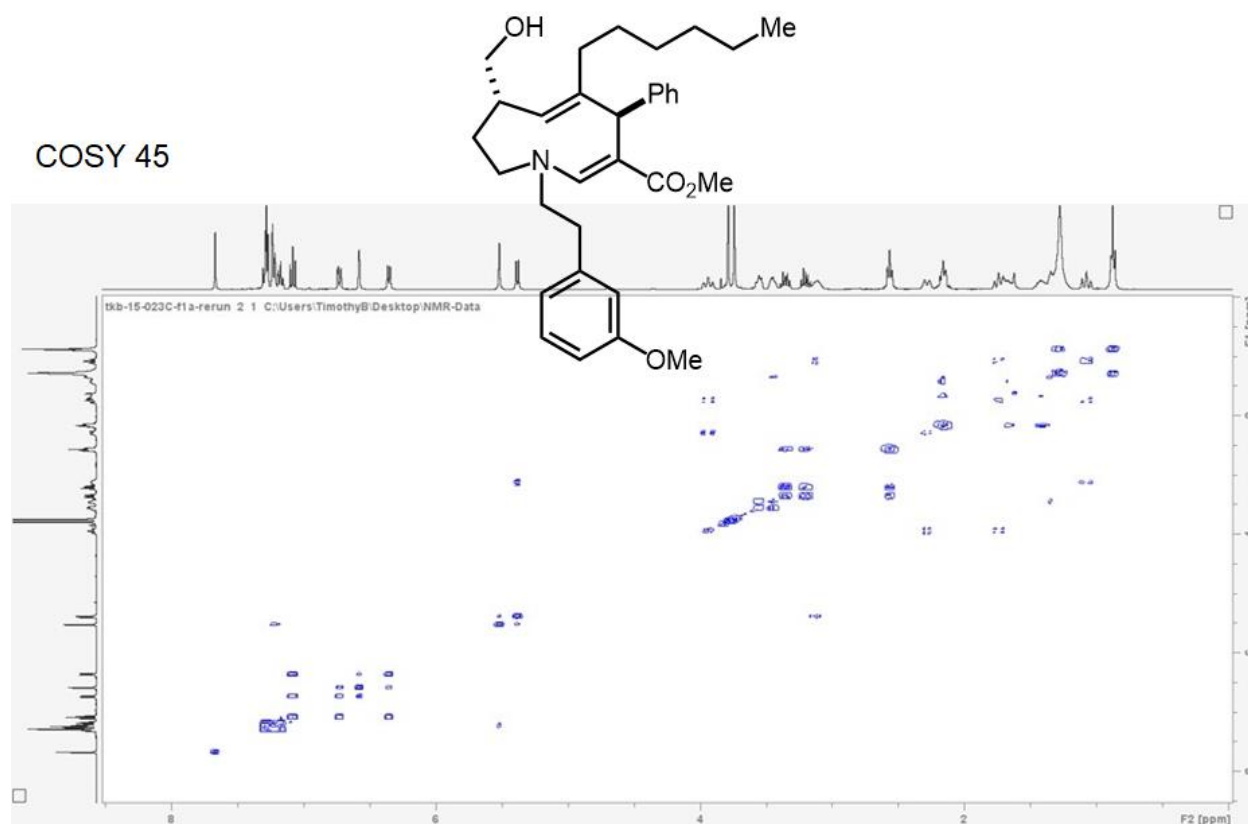

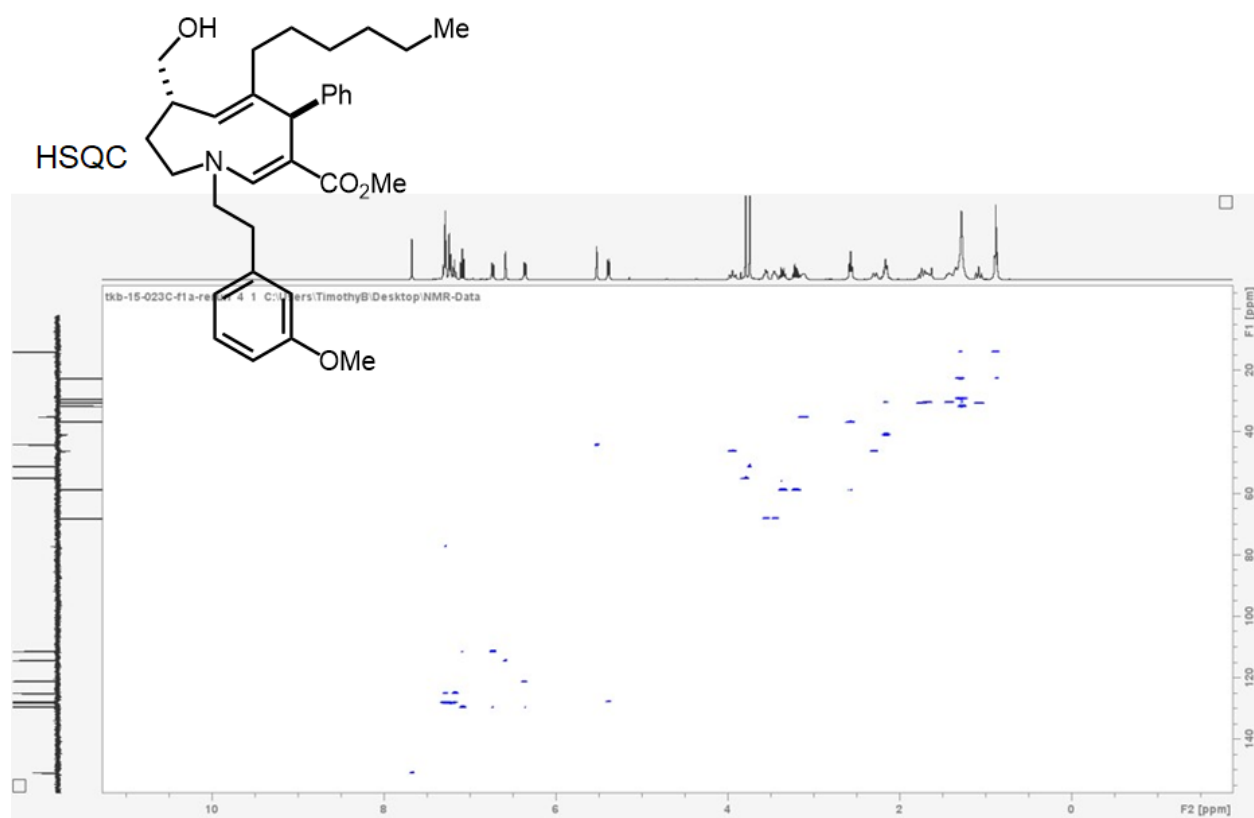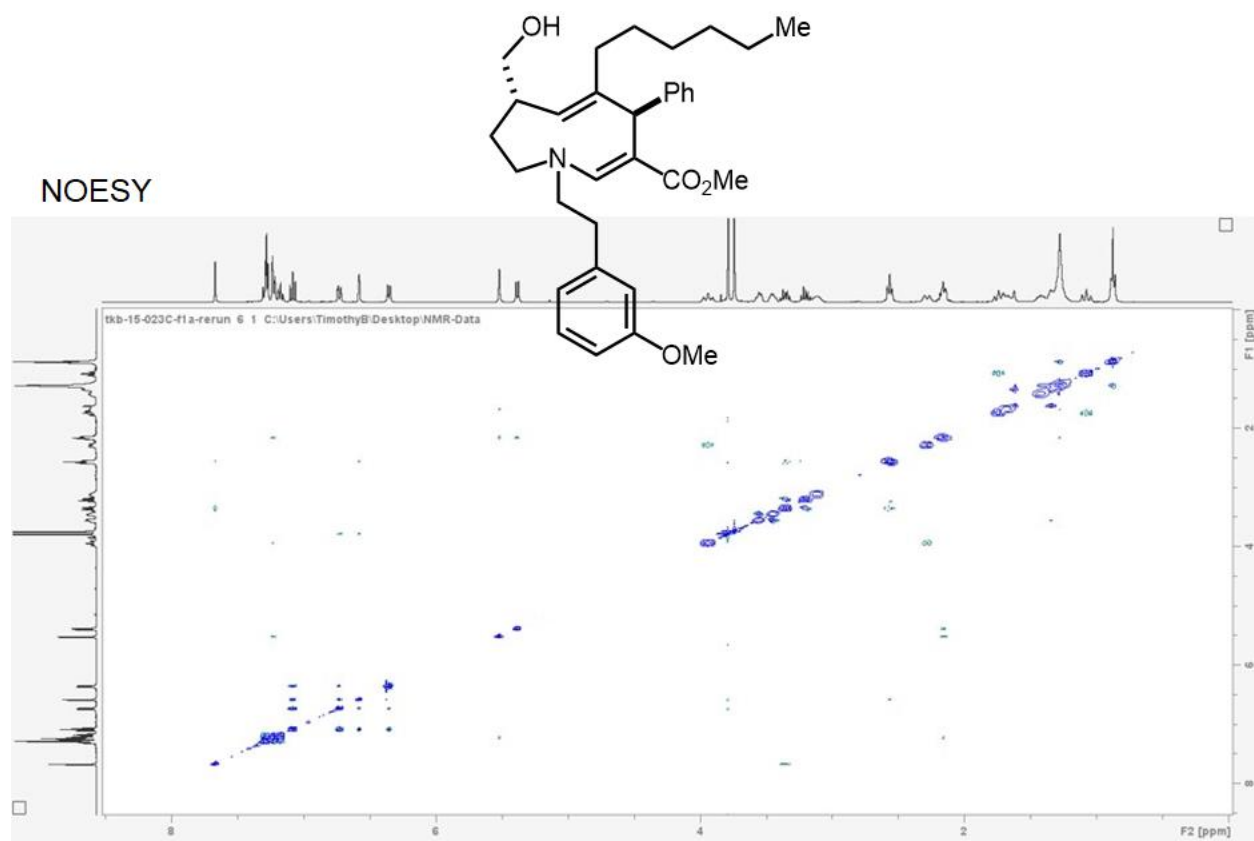

**Compound 8p**

Prepared in 1.0 mmol scale using **General Procedure E**. Purification: Flash chromatography on silica eluting with hexane/acetone (90:10 to 70:30). Greenish-yellow oil. Yield = 360.9 mg, 89%, >99:1 dr.  $^1\text{H}$  NMR (400 MHz,  $\text{CDCl}_3$ )  $\delta$  7.35 – 7.16 (m, 9H), 6.79 (dd,  $J$  = 6.5, 3.1 Hz, 2H), 5.47 (s, 1H), 5.40 (d,  $J$  = 7.5 Hz, 1H), 3.97 (t,  $J$  = 13.8 Hz, 1H), 3.72 (s, 3H), 3.53 (dd,  $J$  = 10.3, 6.4 Hz, 1H), 3.44 (t,  $J$  = 4.9 Hz, 1H), 3.44 – 3.31 (m, 1H), 3.20 (dt,  $J$  = 13.7, 6.8 Hz, 1H), 3.14 – 3.04 (m, 1H), 2.60 (hept,  $J$  = 6.7 Hz, 2H), 2.26 (d,  $J$  = 15.1 Hz, 1H), 1.97 (s, 3H), 1.80 – 1.59 (m, 2H), 1.12 – 0.96 (m, 1H).  $^{13}\text{C}$  NMR (101 MHz,  $\text{CDCl}_3$ )  $\delta$  171.72, 151.09, 145.97, 138.26, 136.57, 128.74, 128.56, 128.53, 128.43, 128.04, 126.27, 125.16, 97.75, 67.97, 59.16, 51.49, 46.56, 45.89, 36.83, 35.45, 30.83, 18.41. **HRMS-EI $^+$**  ( $m/z$ ): calc for  $\text{C}_{26}\text{H}_{31}\text{NO}_3$   $[\text{M}]^+$  405.2304, found 405.2308.

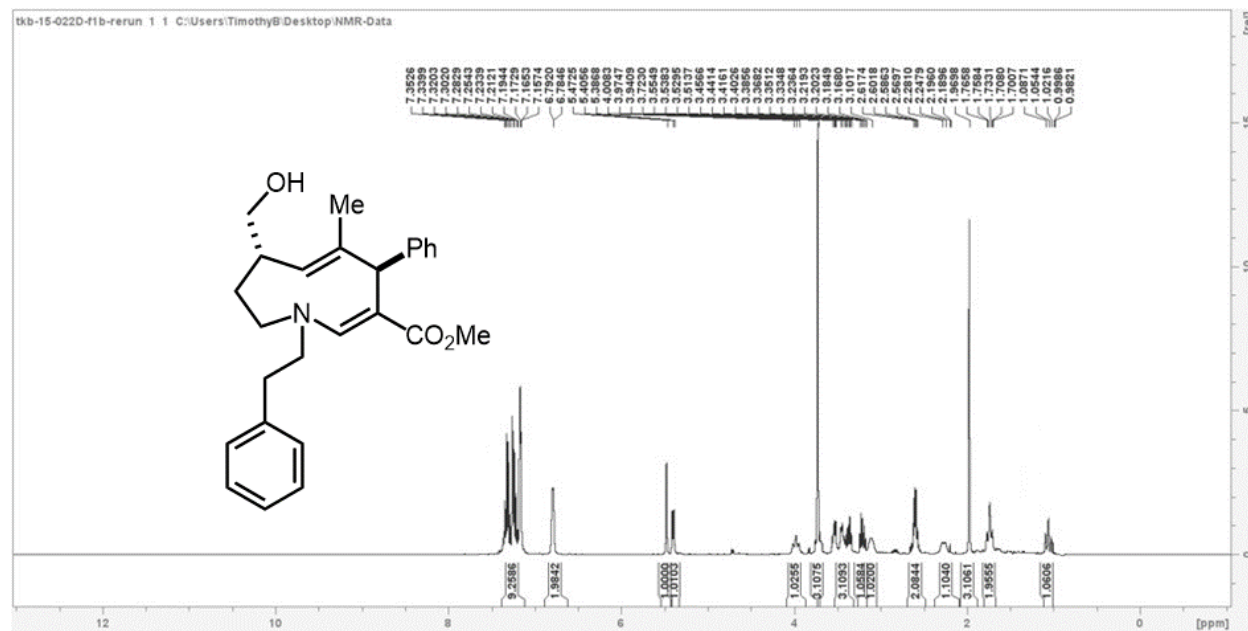

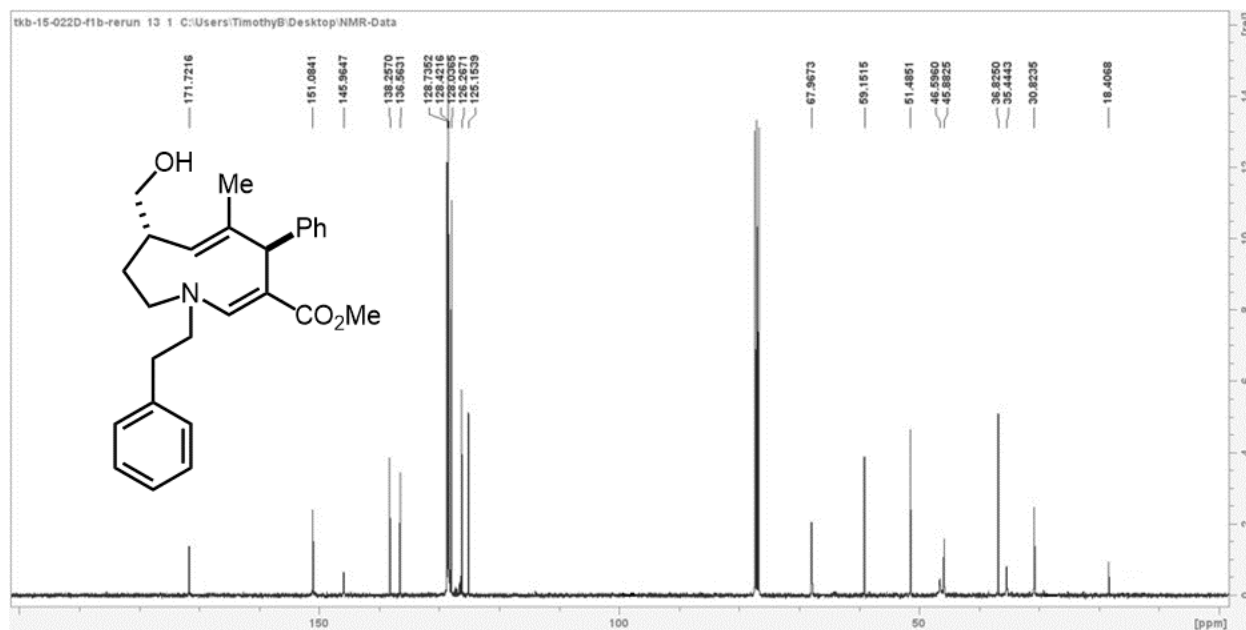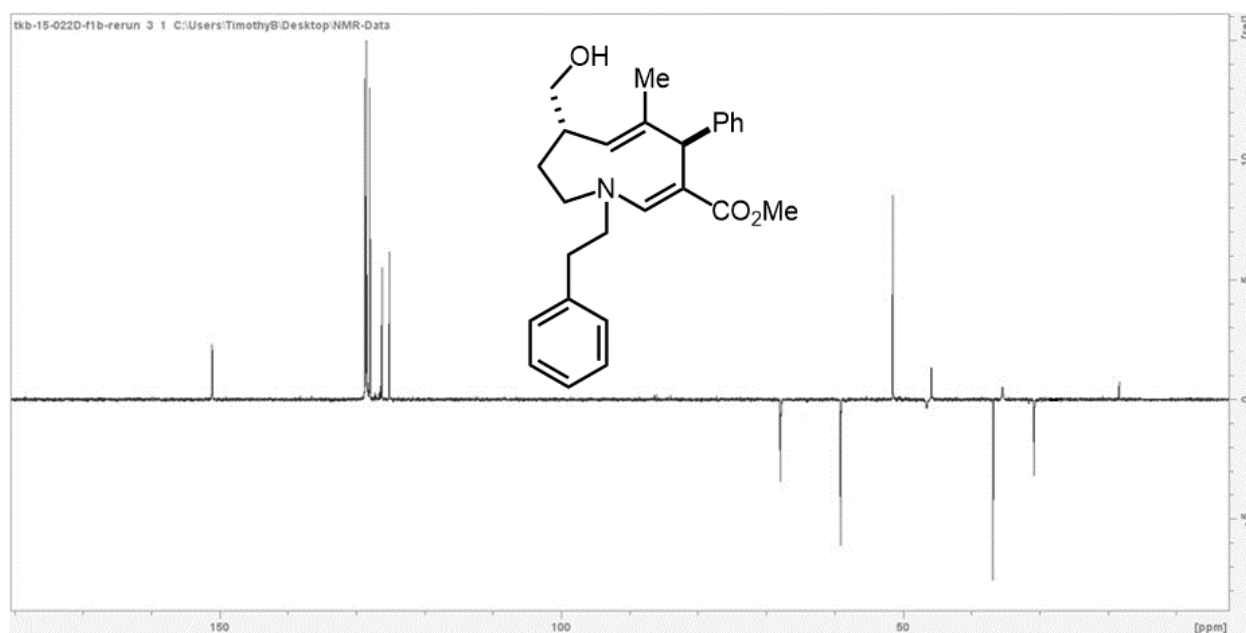

### Compound 8q

Prepared in 1.0 mmol scale using **General Procedure E**. Purification: Flash chromatography on silica eluting with hexane/acetone (90:10 to 70:30). Greenish-yellow oil. Yield = 379.0 mg, 87%, >99:1 dr.  $^1\text{H}$  NMR (400 MHz,  $\text{CDCl}_3$ )  $\delta$  7.61 (s, 1H), 7.42 – 7.15 (m, 5H), 6.69 (s, 4H), 5.48 (s, 1H), 5.40 (d,  $J$  = 7.5 Hz, 1H), 3.95 (q,  $J$  = 10.7 Hz, 1H), 3.79 (s, 3H), 3.73 (s, 3H), 3.54 (dd,  $J$  = 10.2, 6.5 Hz, 1H), 3.52 – 3.41 (m, 1H), 3.40 – 3.22 (m, 1H), 3.16 (ddd,  $J$  = 13.7, 7.3, 6.2 Hz, 2H), 2.55 (tq,  $J$  = 13.8, 6.6 Hz, 2H), 2.28 – 2.16 (m, 1H), 1.97 (s, 3H), 1.72 (tt,  $J$  = 13.0, 3.1 Hz,

1H), 1.55 – 1.41 (m, 1H), 1.28 (qd,  $J = 7.2, 4.8$  Hz, 1H), 1.12 – 0.96 (m, 1H).  $^{13}\text{C}$  NMR (101 MHz,  $\text{CDCl}_3$ )  $\delta$  171.69, 158.04, 151.07, 146.06, 136.67, 130.31, 129.68, 128.51, 128.47, 128.03, 125.12, 113.94, 97.63, 68.05, 59.31, 55.20, 51.48, 46.59, 45.91, 35.94, 30.80, 15.34. **HRMS-EI<sup>+</sup>** ( $m/z$ ): calc for  $\text{C}_{27}\text{H}_{33}\text{NO}_4$   $[\text{M}]^+$  435.2410, found 435.2415.

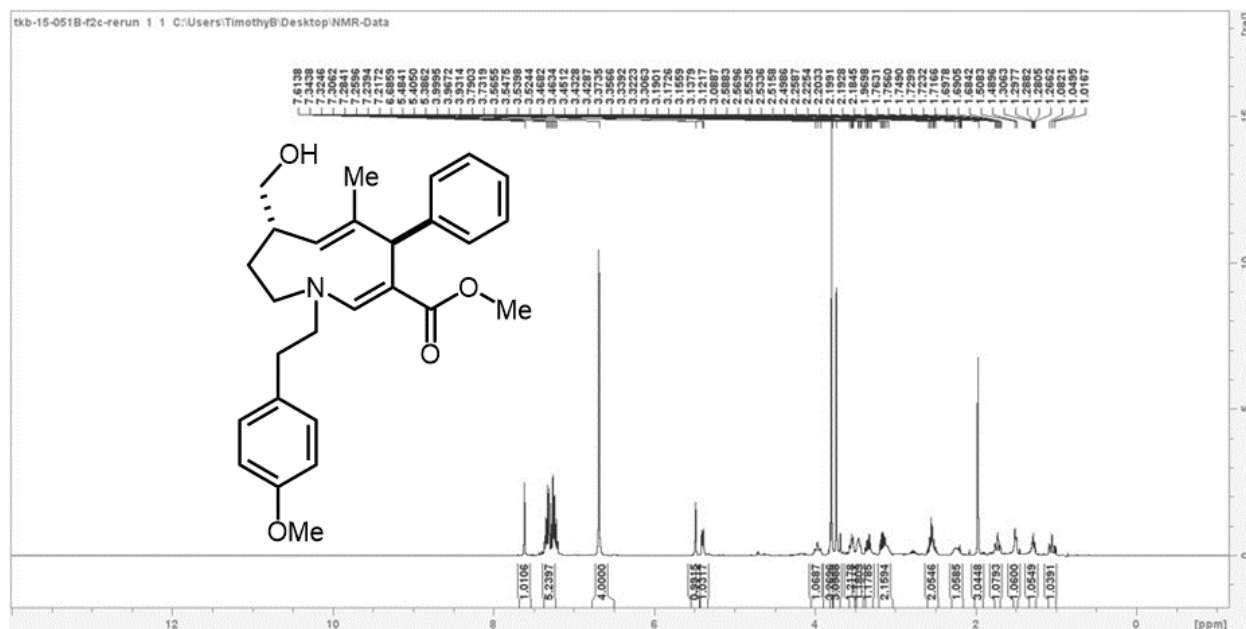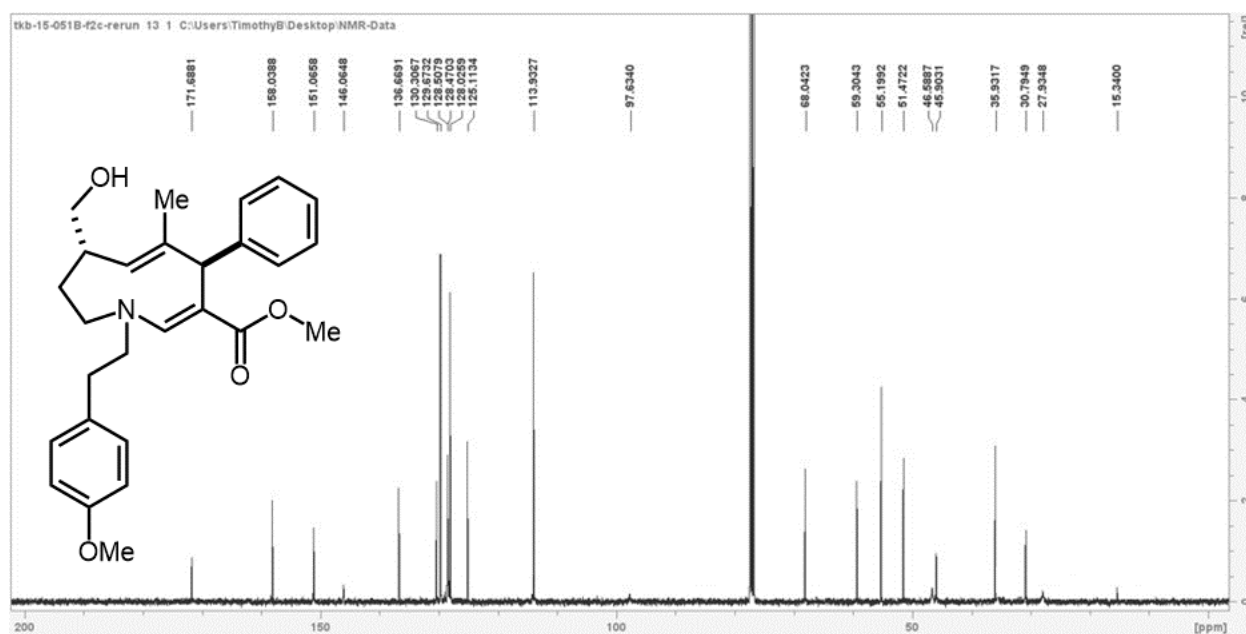

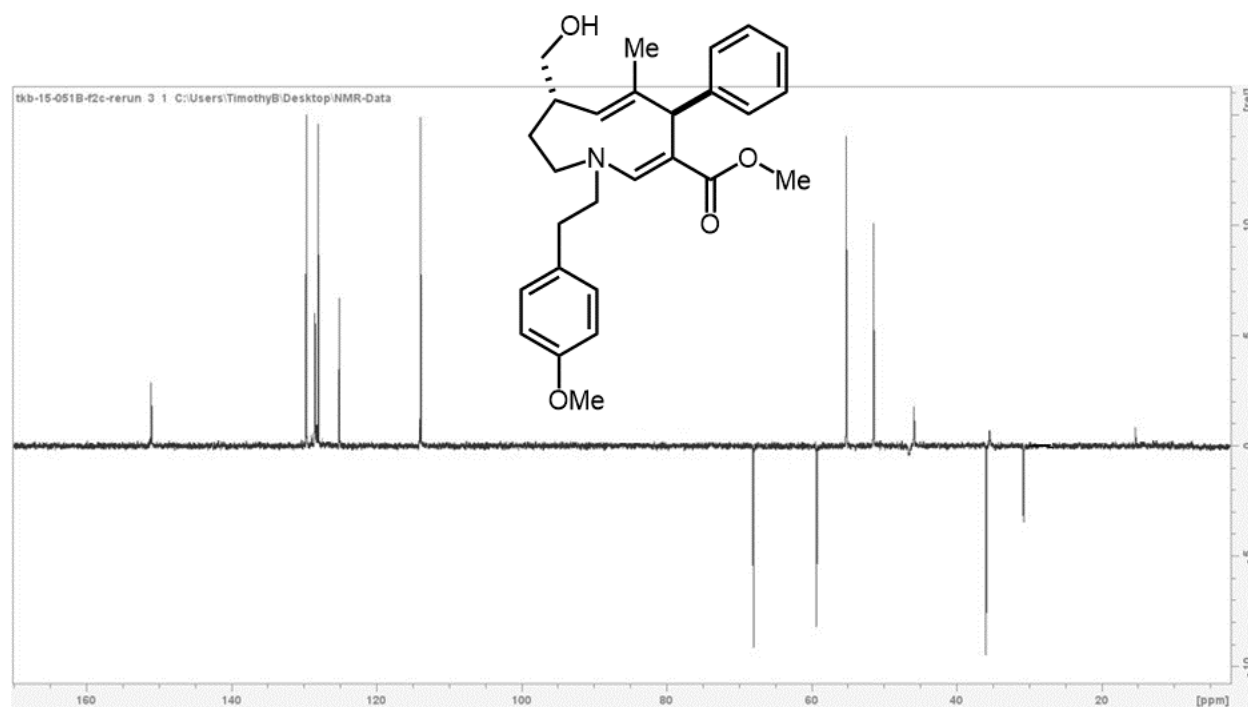

### Compound 8r

Prepared in 1.0 mmol scale using **General Procedure E**. Purification: Flash chromatography on silica eluting with hexane/acetone (90:10 to 70:30). Greenish-yellow oil. Yield = 352.5 mg, 90%, >99:1 dr. <sup>1</sup>H NMR (400 MHz, CDCl<sub>3</sub>) δ 7.78 (s, 1H), 7.32 – 7.28 (m, 4H), 7.22 – 7.14 (m, 4H), 6.68 – 6.62 (m, 2H), 5.54 (s, 1H), 5.44 (dt, *J* = 7.6, 1.4 Hz, 1H), 4.39 – 4.25 (m, 2H), 4.15 (t, *J* = 14.0 Hz, 1H), 3.76 (s, 3H), 3.59 (dd, *J* = 10.3, 6.3 Hz, 1H), 3.49 (dt, *J* = 9.1, 4.0 Hz, 1H), 3.37 – 3.25 (m, 1H), 2.39 (d, *J* = 15.1 Hz, 1H), 2.03 (s, 3H), 1.81 (tt, *J* = 13.0, 3.1 Hz, 1H), 1.76 (s, 1H), 1.10 (tt, *J* = 13.3, 2.6 Hz, 1H). <sup>13</sup>C NMR (101 MHz, CDCl<sub>3</sub>) δ 171.57, 152.00, 146.11, 137.31, 136.53, 128.61, 128.54, 128.50, 128.06, 127.29, 126.27, 125.24, 98.65, 68.06, 61.15, 51.57, 46.09, 45.81, 30.82, 15.33. **HRMS-EI<sup>+</sup>** (*m/z*): calc for C<sub>25</sub>H<sub>29</sub>NO<sub>3</sub> [M]<sup>+</sup> 391.2147, found 391.2152.

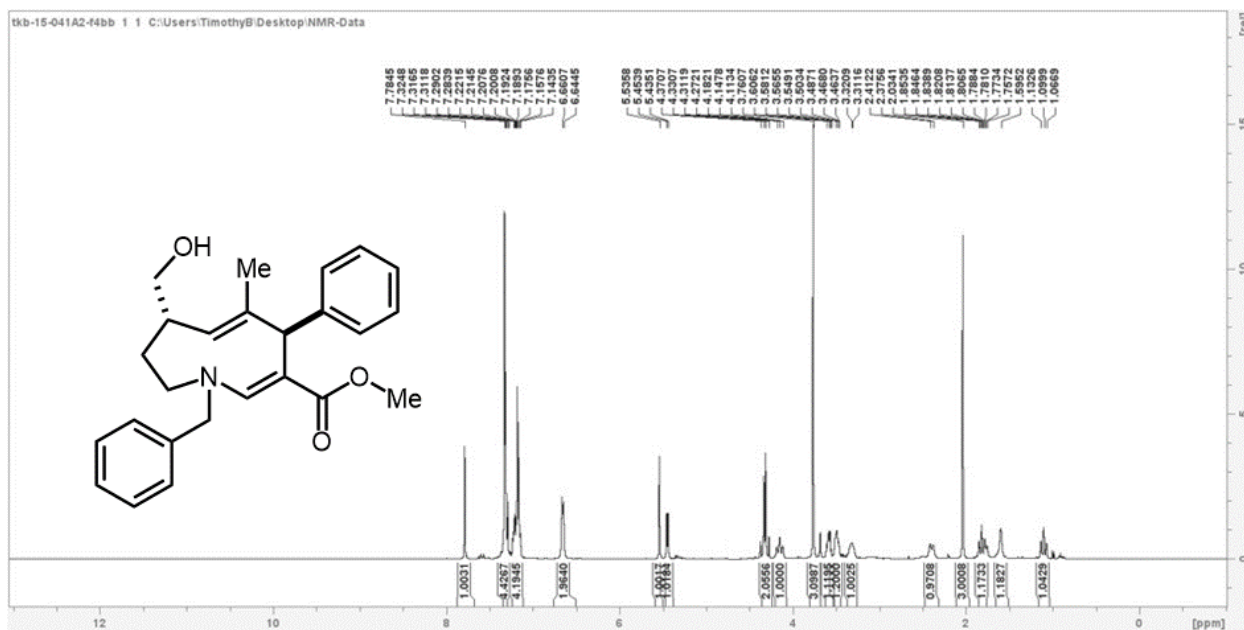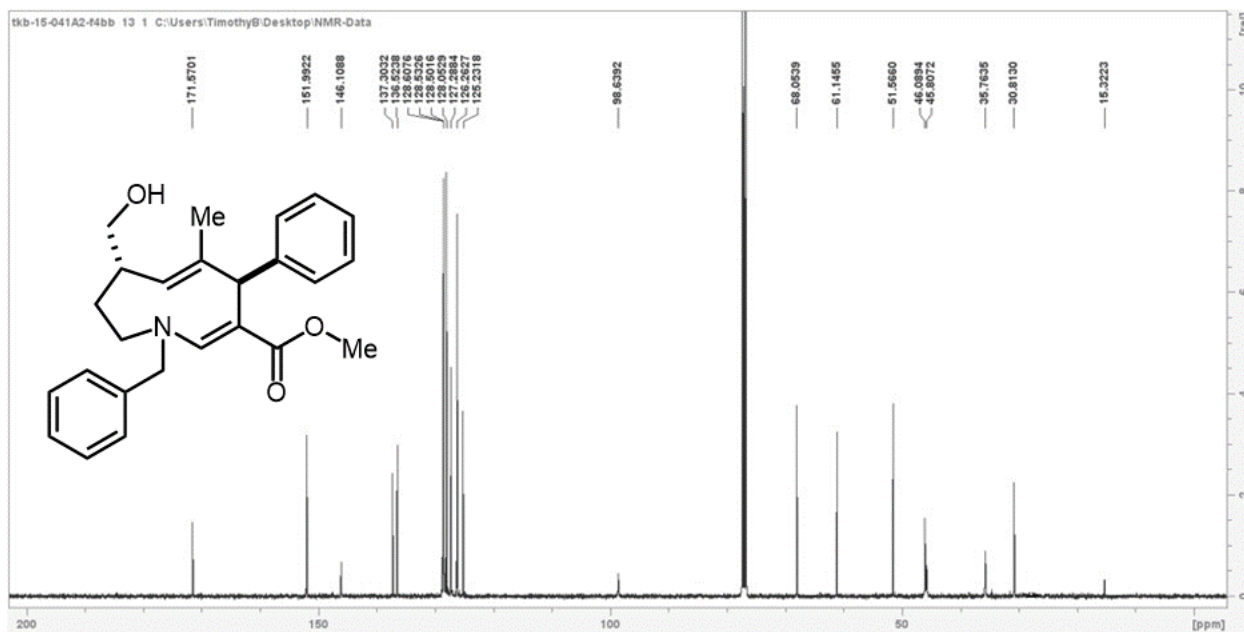



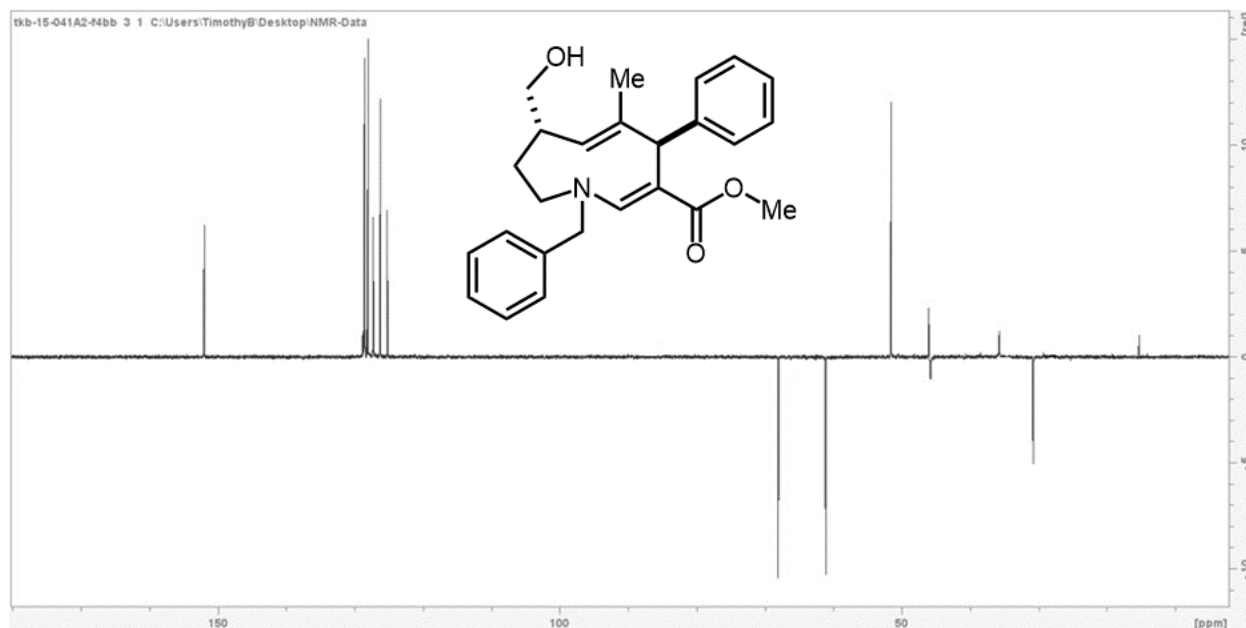

### Compound 8s

Prepared in 1.0 mmol scale using **General Procedure E**. Purification: Flash chromatography on silica eluting with hexane/acetone (90:10 to 50:50). Amorphous solid. Yield = 396.2 mg, 94%, >99:1 dr.  $^1\text{H}$  NMR (400 MHz,  $\text{CDCl}_3$ )  $\delta$  7.79 (s, 1H), 7.31 – 7.19 (m, 5H), 6.73 – 6.66 (m, 2H), 6.60 (d,  $J$  = 8.2 Hz, 2H), 5.52 (s, 1H), 5.43 (d,  $J$  = 7.5 Hz, 1H), 4.32 – 4.18 (m, 2H), 4.10 (t,  $J$  = 13.9 Hz, 1H), 3.76 (s, 3H), 3.71 (s, 3H), 3.58 (dd,  $J$  = 10.3, 6.4 Hz, 1H), 3.48 (t,  $J$  = 8.2 Hz, 1H), 3.30 (s, 1H), 2.39 (d,  $J$  = 15.1 Hz, 1H), 2.02 (s, 3H), 1.78 (tt,  $J$  = 13.0, 3.1 Hz, 1H), 1.66 (s, 1H), 1.49 – 1.45 (m, 1H), 1.09 (td,  $J$  = 13.1, 6.5 Hz, 1H).  $^{13}\text{C}$  NMR (101 MHz,  $\text{CDCl}_3$ )  $\delta$  171.59, 158.89, 151.93, 136.59, 129.21, 128.57, 128.45, 128.03, 127.60, 125.18, 113.91, 68.09, 60.70, 55.27, 51.55, 46.07, 35.77, 30.78. **HRMS- $\text{EI}^+$**  ( $m/z$ ): calc for  $\text{C}_{26}\text{H}_{31}\text{NO}_4$   $[\text{M}]^+$  421.2253, found 421.2258.

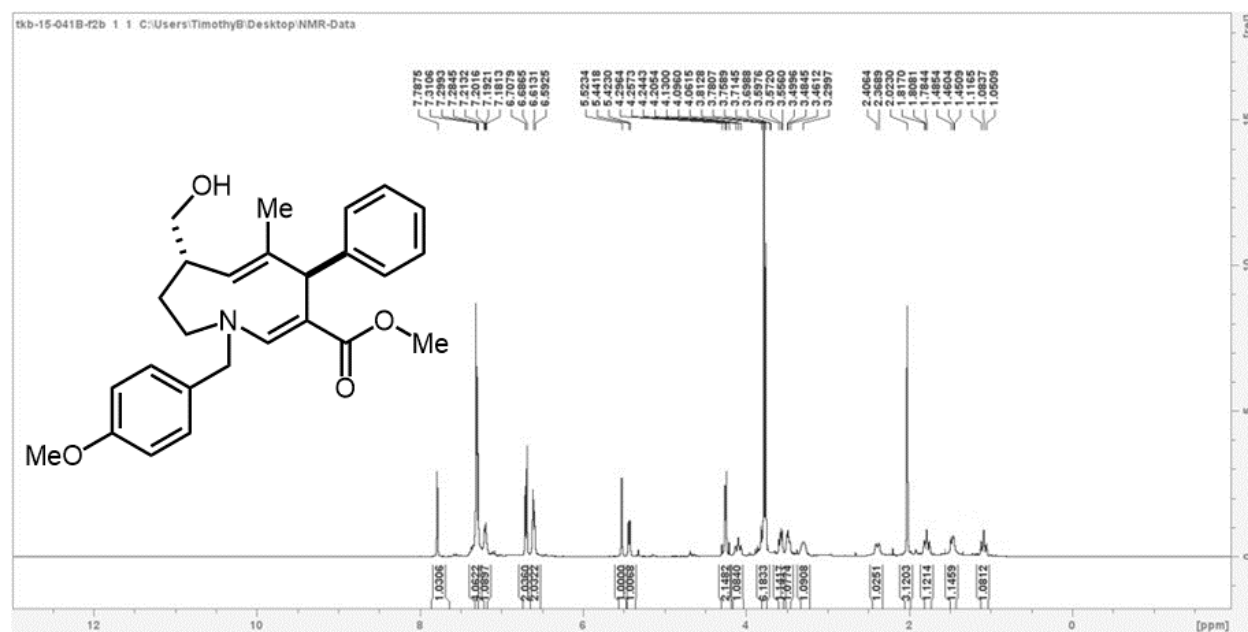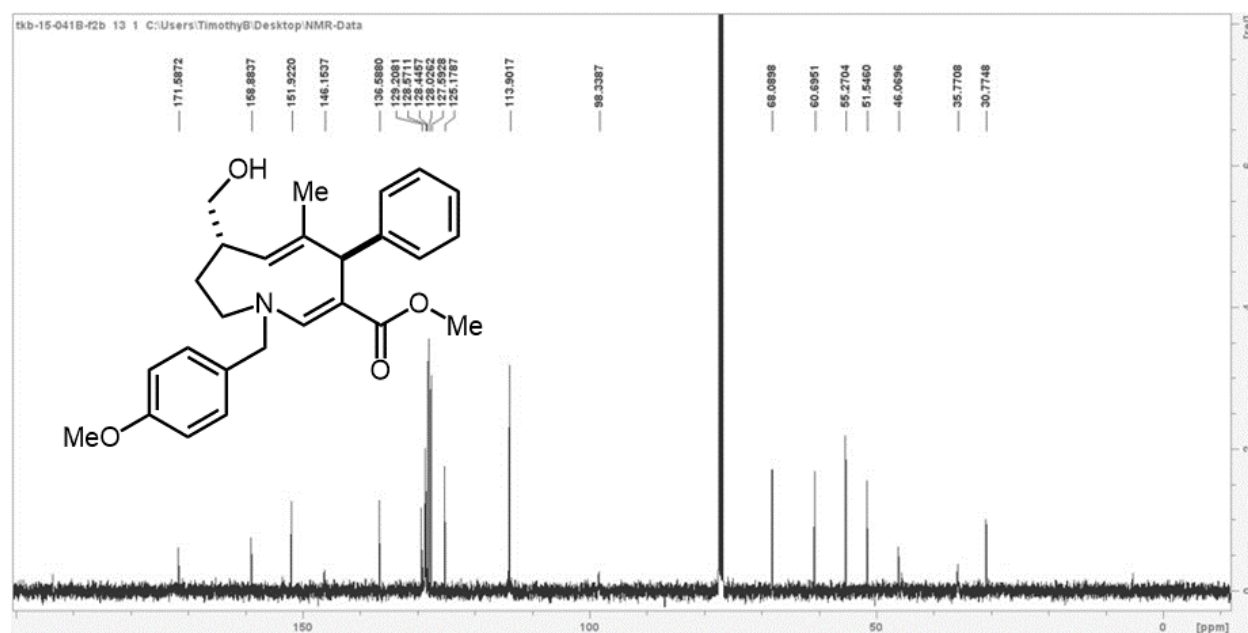

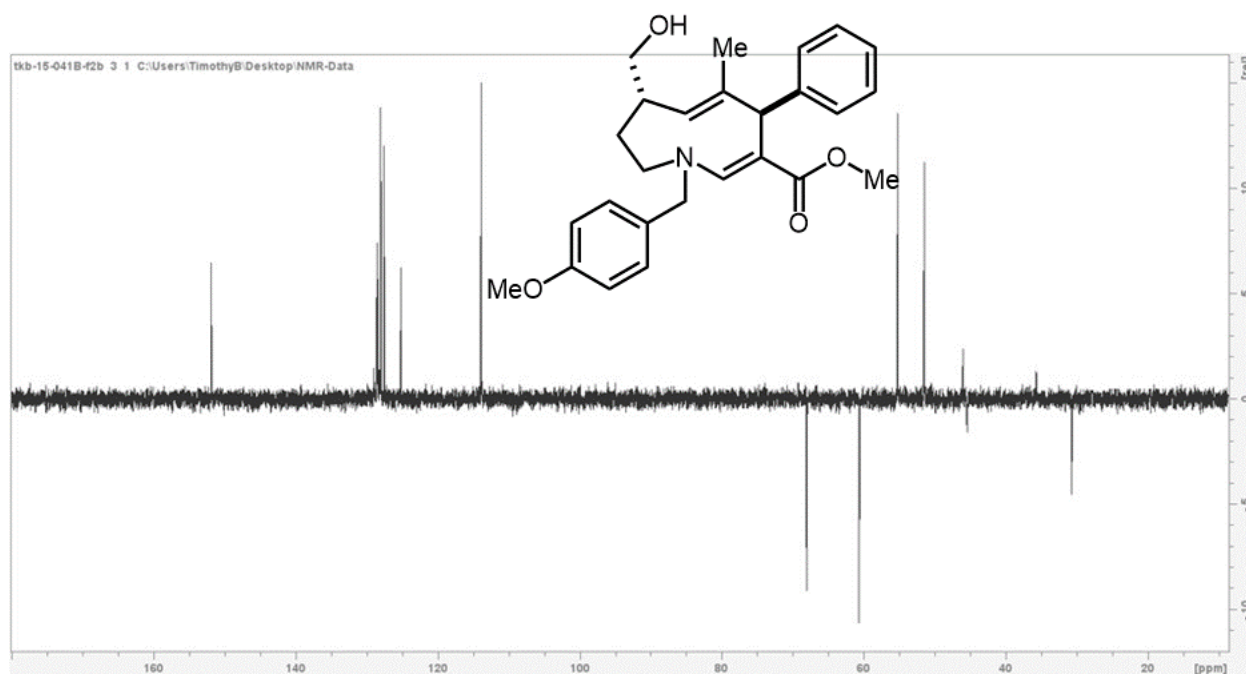

### Compound 8t

Prepared in 1.0 mmol scale using **General Procedure E**. Purification: Flash chromatography on silica eluting with hexane/acetone (90:10 to 70:30). Greenish-yellow oil. Yield = 390.6 mg, 85%, 90:10 dr. <sup>1</sup>H NMR (400 MHz, CDCl<sub>3</sub>) δ 7.76 (s, 1H), 7.45 – 7.41 (m, 1H), 7.31 – 7.20 (m, 6H), 7.14 (s, 1H), 6.71 (d, *J* = 7.7 Hz, 1H), 5.52 (s, 1H), 5.45 (d, *J* = 7.2 Hz, 1H), 4.44 – 4.27 (m, 2H), 4.14 (t, *J* = 14.0 Hz, 1H), 3.77 (s, 3H), 3.66 – 3.52 (m, 2H), 3.57 – 3.37 (m, 2H), 3.48 – 3.30 (m, 1H), 2.36 (d, *J* = 15.1 Hz, 1H), 2.04 (s, 3H), 1.85 (tt, *J* = 13.2, 3.3 Hz, 1H), 1.28 – 1.19 (m, 1H), 1.12 (tt, *J* = 13.0, 2.5 Hz, 1H). <sup>13</sup>C NMR (101 MHz, CDCl<sub>3</sub>) δ 171.38, 151.61, 145.72, 138.52, 136.58, 129.56, 129.14, 128.44, 128.35, 128.24, 128.22, 128.13, 126.35, 125.41, 124.30, 124.26, 123.27, 123.23, 99.54, 68.04, 60.59, 51.65, 46.00, 35.73, 30.54, 27.89, 15.30. **HRMS-EI<sup>+</sup>** (*m/z*): calc for C<sub>26</sub>H<sub>28</sub>F<sub>3</sub>NO<sub>3</sub> [M]<sup>+</sup> 459.2021, found 459.2027.

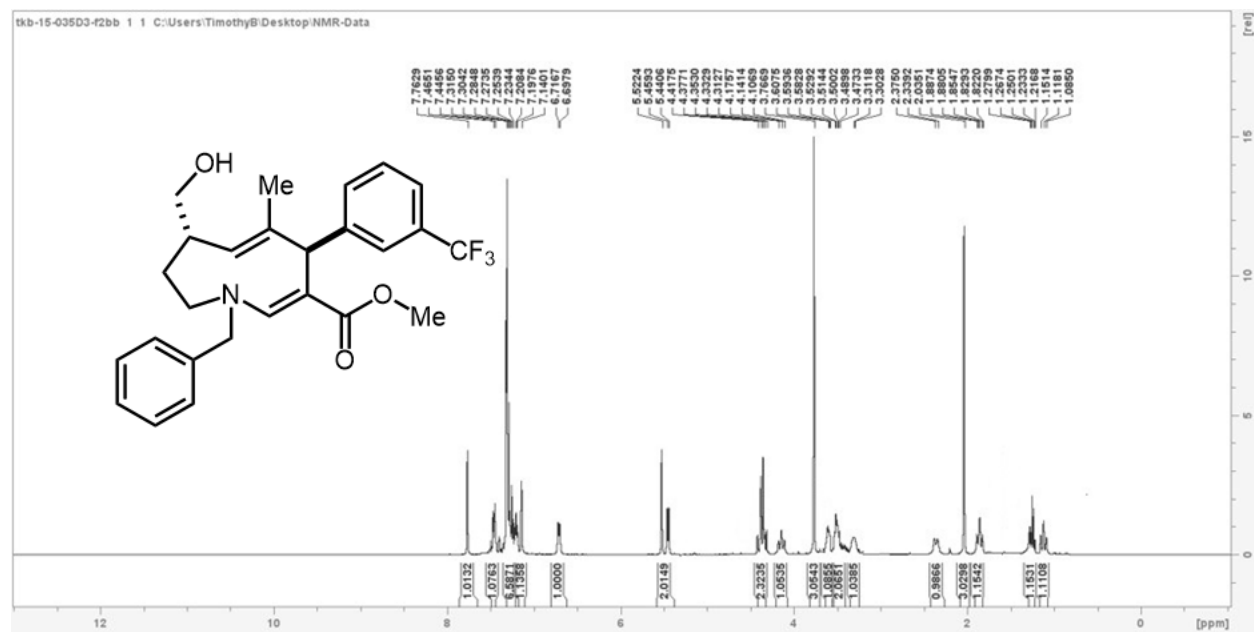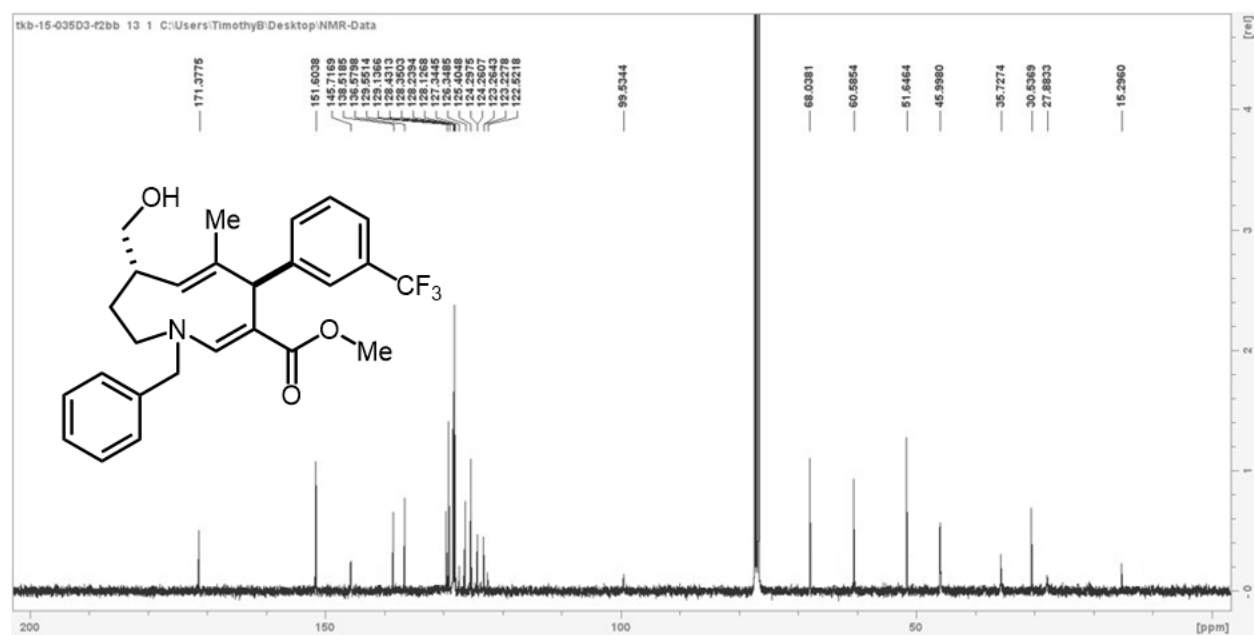

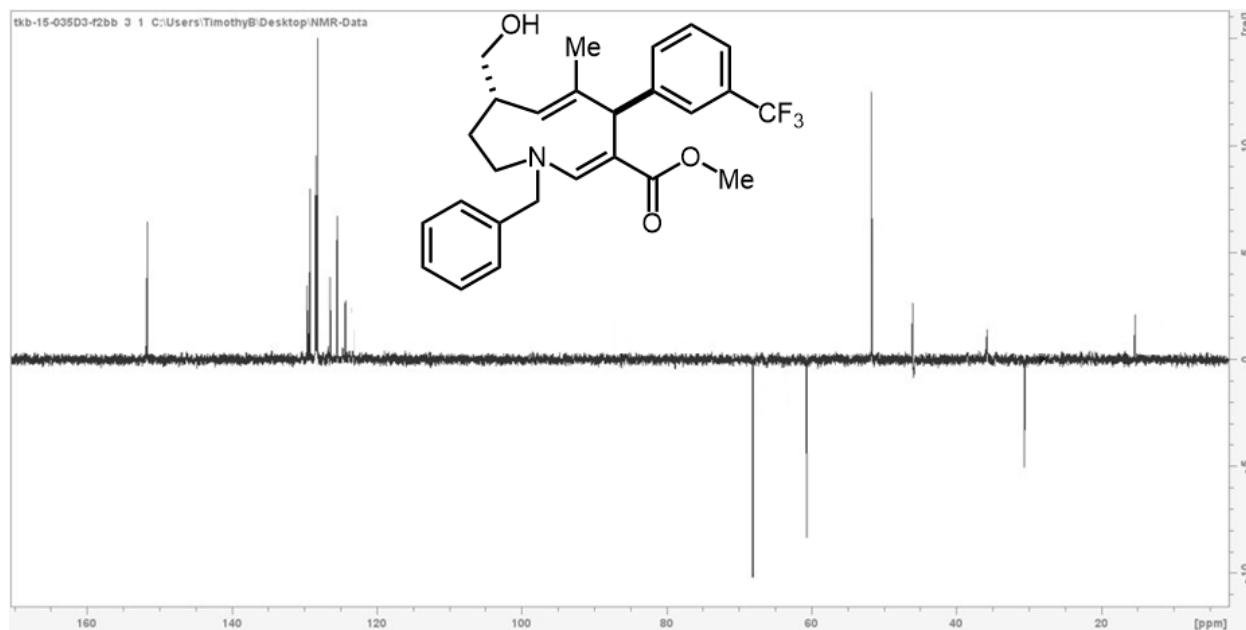<sup>19</sup>F NMR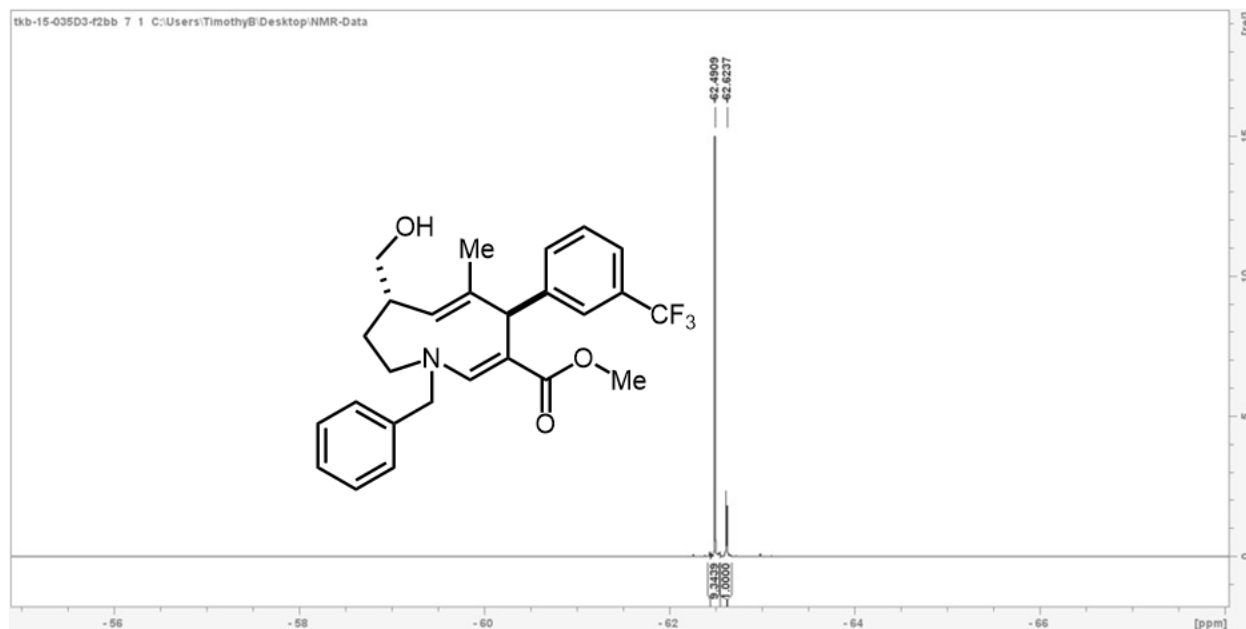**Compound 8u**

Prepared in 1.0 mmol scale using **General Procedure E**. Purification: Flash chromatography on silica eluting with hexane/acetone (90:10 to 70:30). Greenish-yellow oil. Yield = 372.6 mg, 91%, 95:5 dr. <sup>1</sup>H NMR (400 MHz, CDCl<sub>3</sub>) δ 7.75 (s, 1H), 7.32 – 7.20 (m, 5H), 6.89 – 6.78 (m, 2H), 6.59 (dd, *J* = 8.4, 5.2 Hz, 2H), 5.53 (s, 1H), 5.44 (dt, *J* = 7.6, 1.3 Hz, 1H), 4.35 – 4.20 (m, 2H), 4.14 (t, *J* = 13.8 Hz, 1H), 3.76 (s, 3H), 3.68 (d, *J* = 1.7 Hz, 1H), 3.64 – 3.56 (m, 1H), 3.49 (br s,

1H), 3.56 – 3.35 (m, 1H), 2.36 (d,  $J = 15.0$  Hz, 1H), 2.02 (s, 3H), 1.82 (tt,  $J = 13.0, 3.1$  Hz, 1H), 1.45 – 1.41 (m, 1H), 1.21 – 1.04 (m, 1H).  $^{13}\text{C}$  NMR (101 MHz,  $\text{CDCl}_3$ )  $\delta$  171.44, 163.24, 160.79, 151.78, 146.08, 136.52, 128.63, 128.43, 128.05, 127.88, 127.80, 125.27, 115.49, 115.27, 68.07, 60.48, 51.60, 46.08, 45.73, 35.78, 30.81, 15.31. **HRMS- $\text{EI}^+$**  ( $m/z$ ): calc for  $\text{C}_{25}\text{H}_{28}\text{FNO}_3$   $[\text{M}]^+$  409.2053, found 409.2060.

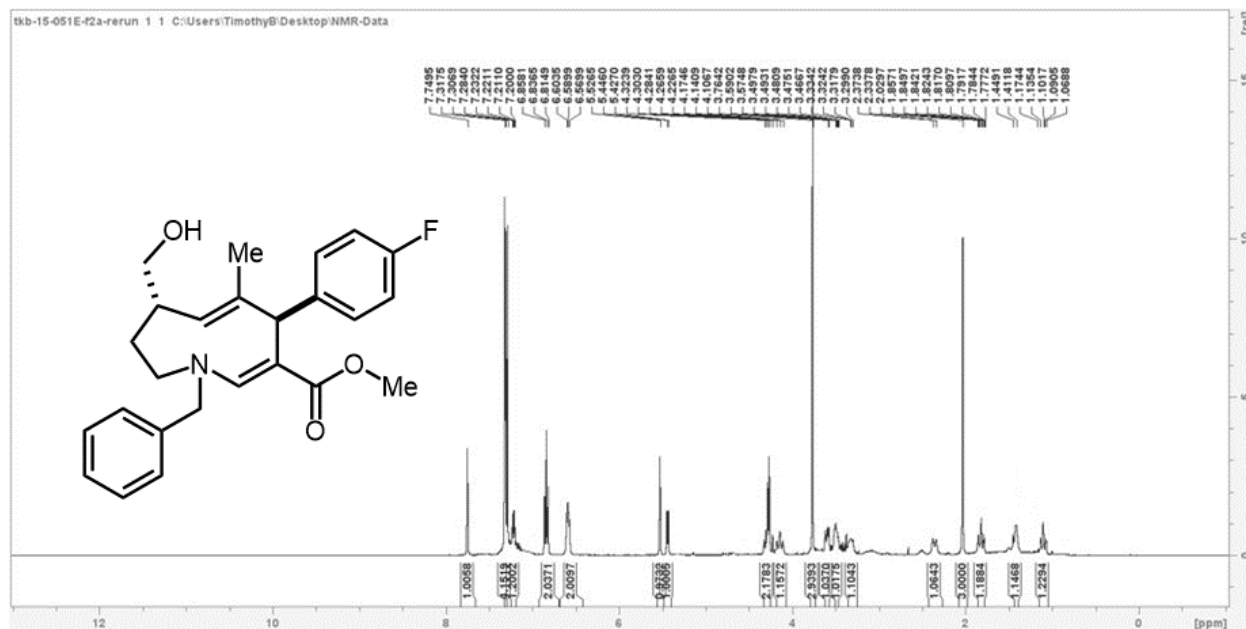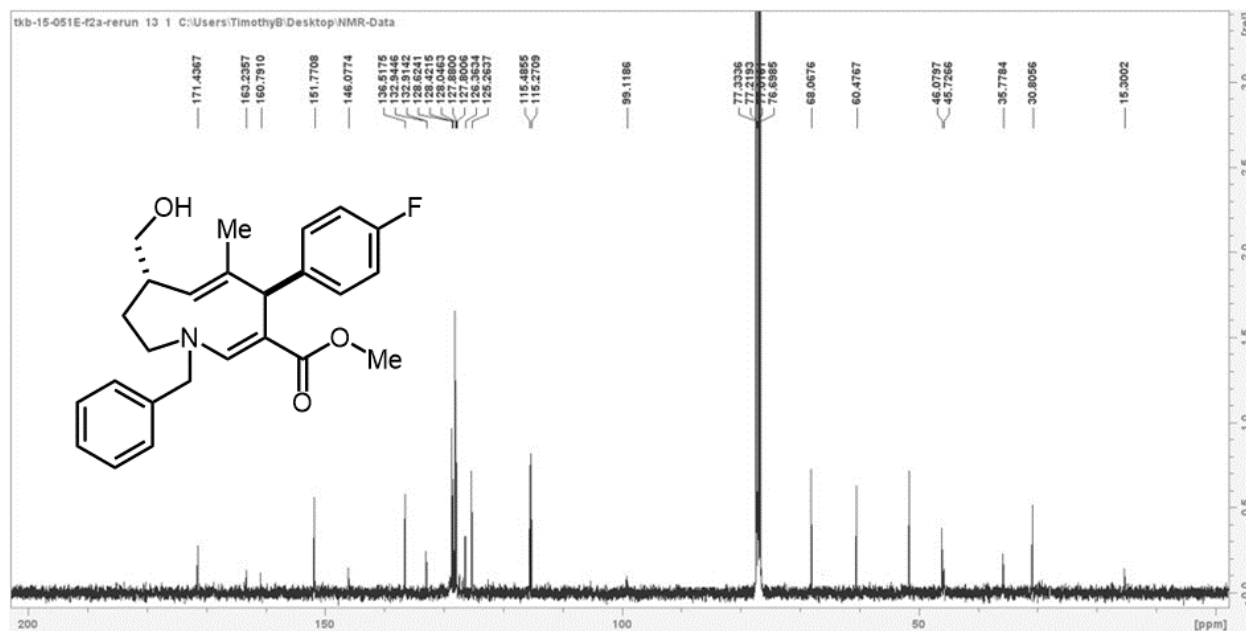

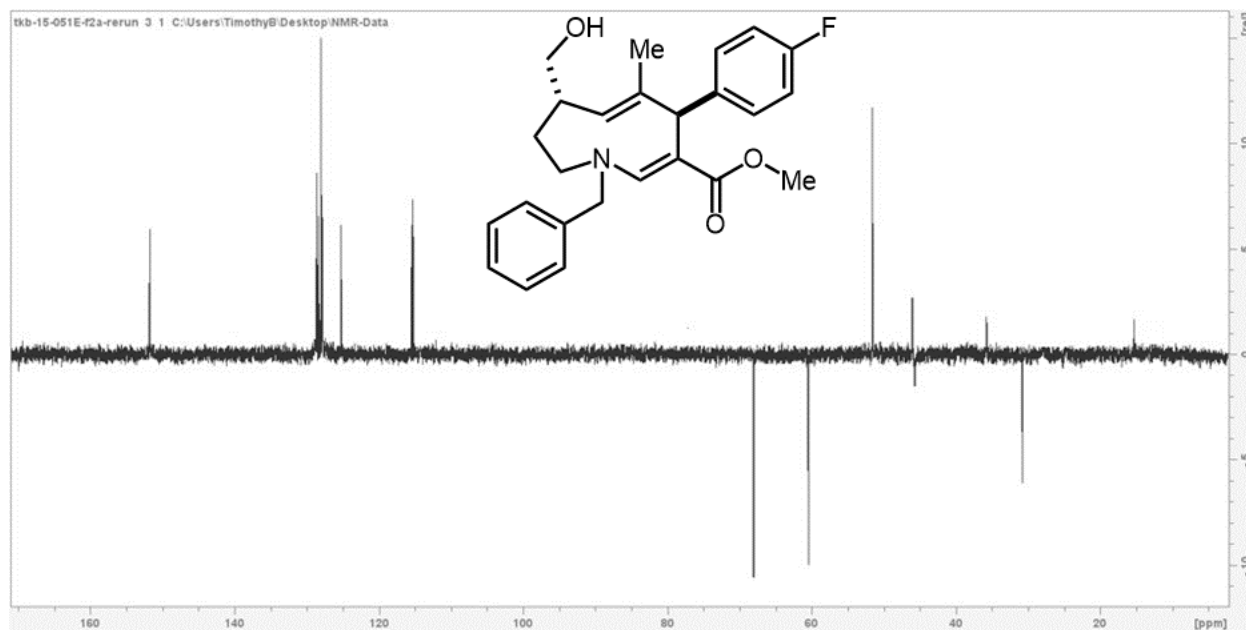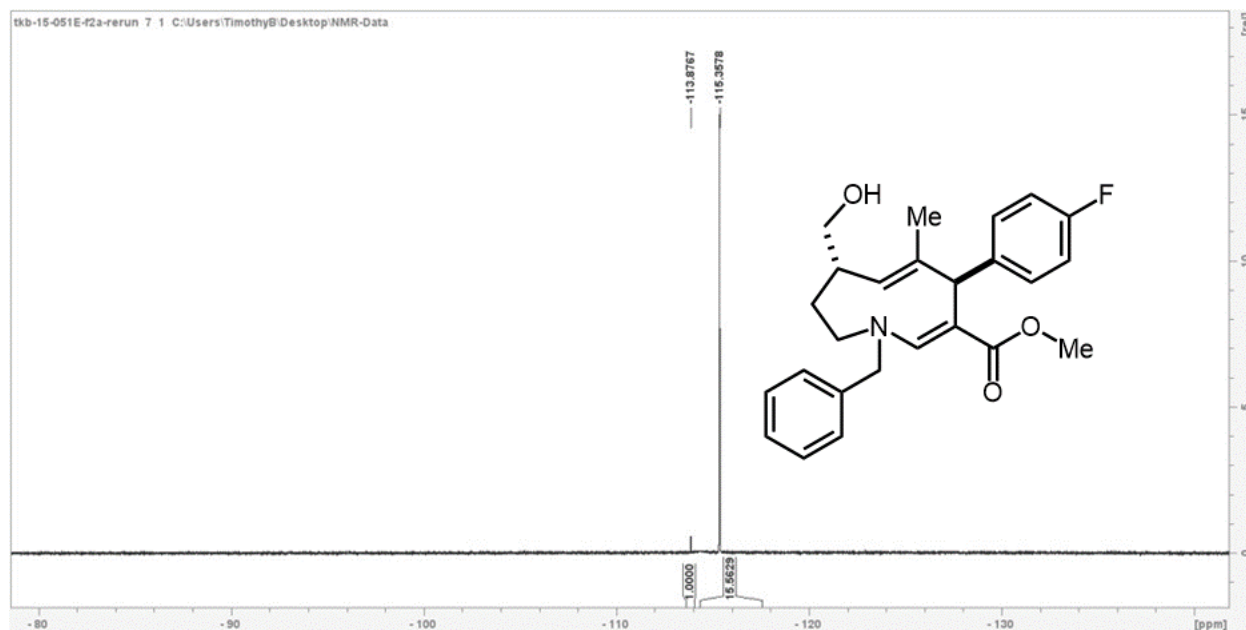

### Compound 8v

Prepared in 1.0 mmol scale using **General Procedure E**. Purification: Flash chromatography on silica eluting with hexane/acetone (90:10 to 70:30). Amorphous solid. Yield = 291.9 mg, 85%, >99:1 dr.  $^1\text{H}$  NMR (400 MHz,  $\text{CDCl}_3$ )  $\delta$  7.24 (d,  $J = 4.4$  Hz, 4H), 7.10 (dh,  $J = 7.7, 4.1$  Hz, 1H), 5.46 – 5.37 (m, 2H), 3.96 (t,  $J = 14.0$  Hz, 1H), 3.73 (s, 3H), 3.55 (dd,  $J = 10.3, 6.3$  Hz, 1H), 3.45 (dd,  $J = 10.3, 6.4$  Hz, 1H), 3.29 (hept,  $J = 6.9$  Hz, 1H), 3.20 – 3.12 (m, 1H), 2.52 (d,  $J = 15.3$  Hz,

1H), 1.98 (s, 3H), 1.72 (tt,  $J = 12.7, 3.1$  Hz, 2H), 1.23 – 1.20 (m, 2H), 1.07 – 1.05 (dd, 6H).

**HRMS-EI<sup>+</sup> (*m/z*):** calc for C<sub>21</sub>H<sub>29</sub>NO<sub>3</sub> [M]<sup>+</sup> 343.2147, found 343.2142.

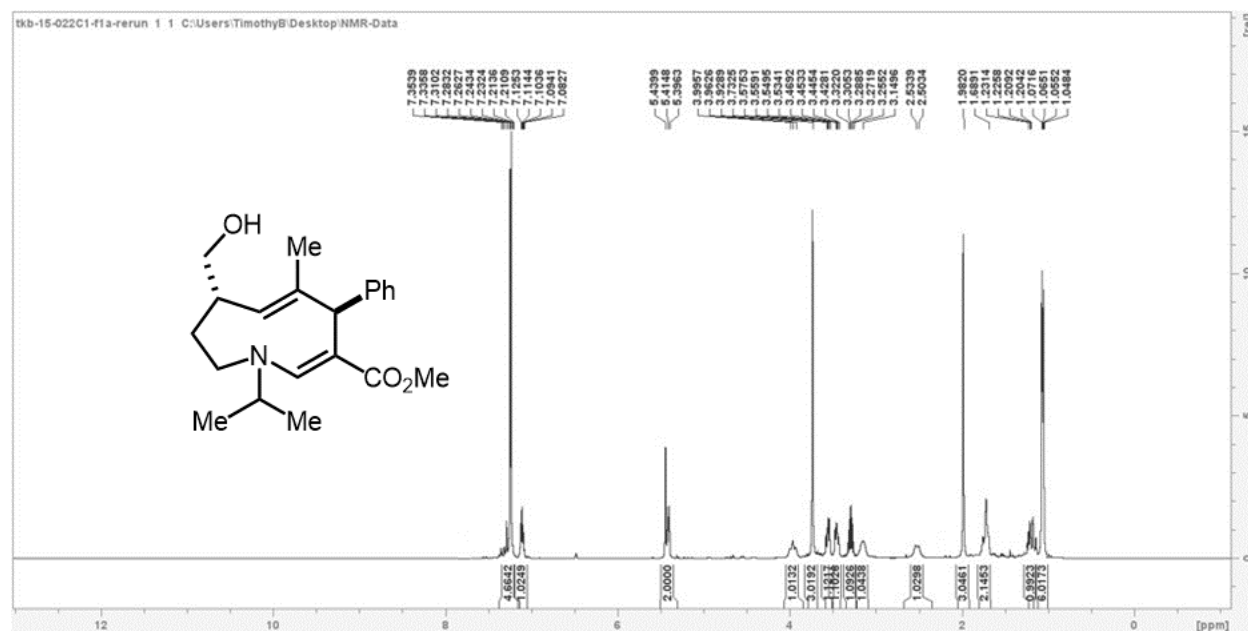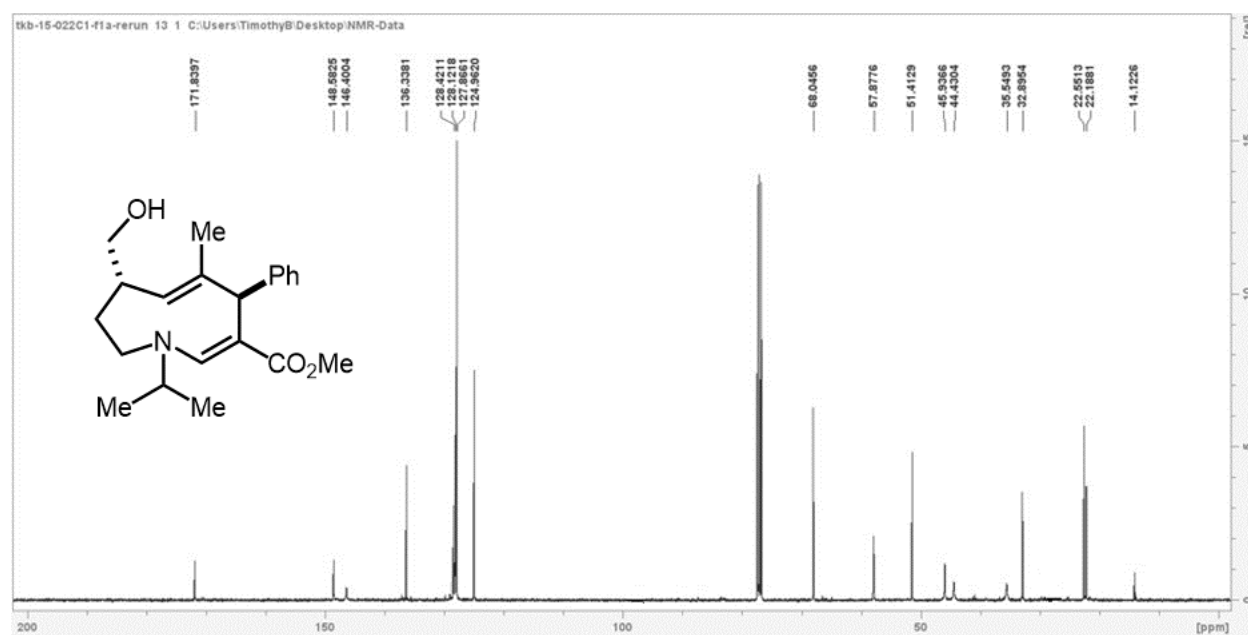



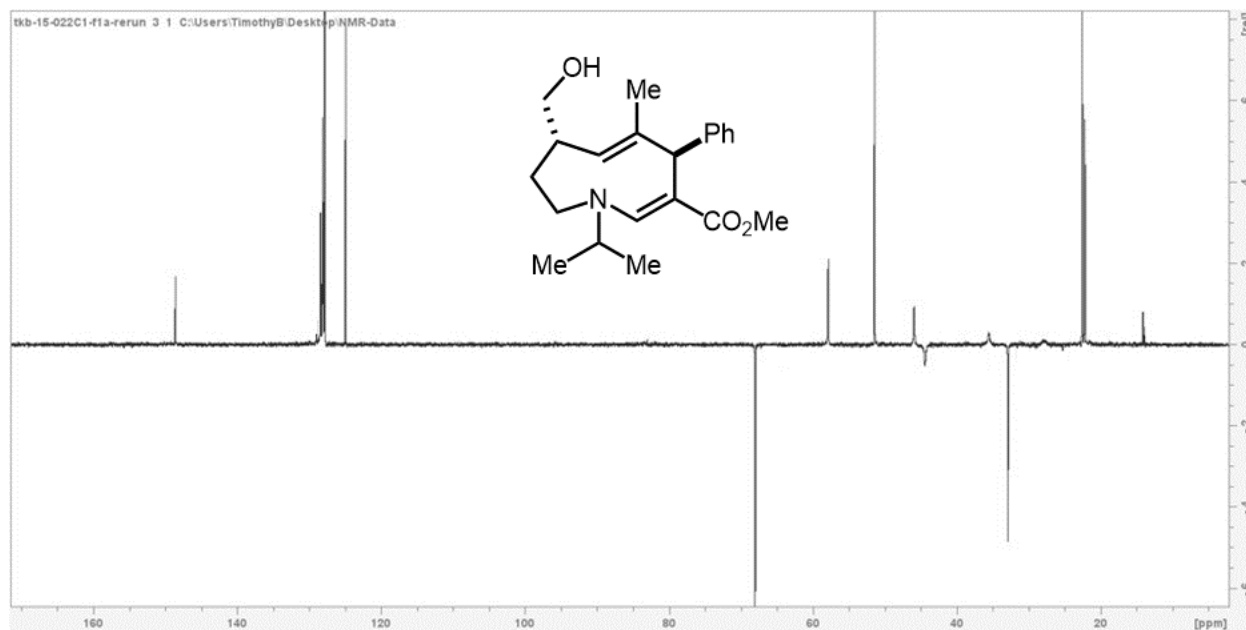

### Compound 8w

Prepared in 1.0 mmol scale using **General Procedure E**. Purification: Flash chromatography on silica eluting with hexane/acetone (90:10 to 70:30). Amorphous solid. Yield = 321.5 mg, 87%, >99:1 dr. <sup>1</sup>H NMR (400 MHz, CDCl<sub>3</sub>) δ 7.83 (s, 1H), 7.28 – 7.22 (m, 5H), 7.12 (tdd, *J* = 5.4, 4.3, 2.6 Hz, 1H), 5.46 (s, 1H), 5.41 (dt, *J* = 7.4, 1.3 Hz, 1H), 4.02 (t, *J* = 14.0 Hz, 1H), 3.74 (s, 3H), 3.56 (dd, *J* = 10.4, 6.5 Hz, 1H), 3.43 (td, *J* = 19.3, 9.0 Hz, 2H), 3.15 (br. s, 1H), 2.53 (d, *J* = 15.0 Hz, 1H), 1.99 (s, 3H), 1.85 – 1.61 (m, 6H), 1.56 – 1.27 (m, 4H), 1.16 (tt, *J* = 13.1, 2.6 Hz, 1H). <sup>13</sup>C NMR (101 MHz, CDCl<sub>3</sub>) δ 171.79, 148.86, 146.24, 136.61, 128.46, 128.18, 127.90, 124.98, 68.14, 67.47, 51.46, 45.96, 35.62, 32.41, 32.11, 32.06, 32.03, 29.88, 23.67, 23.42. **HRMS-EI<sup>+</sup>** (*m/z*): calc for C<sub>23</sub>H<sub>31</sub>NO<sub>3</sub> [M]<sup>+</sup> 369.2304, found 369.2308.

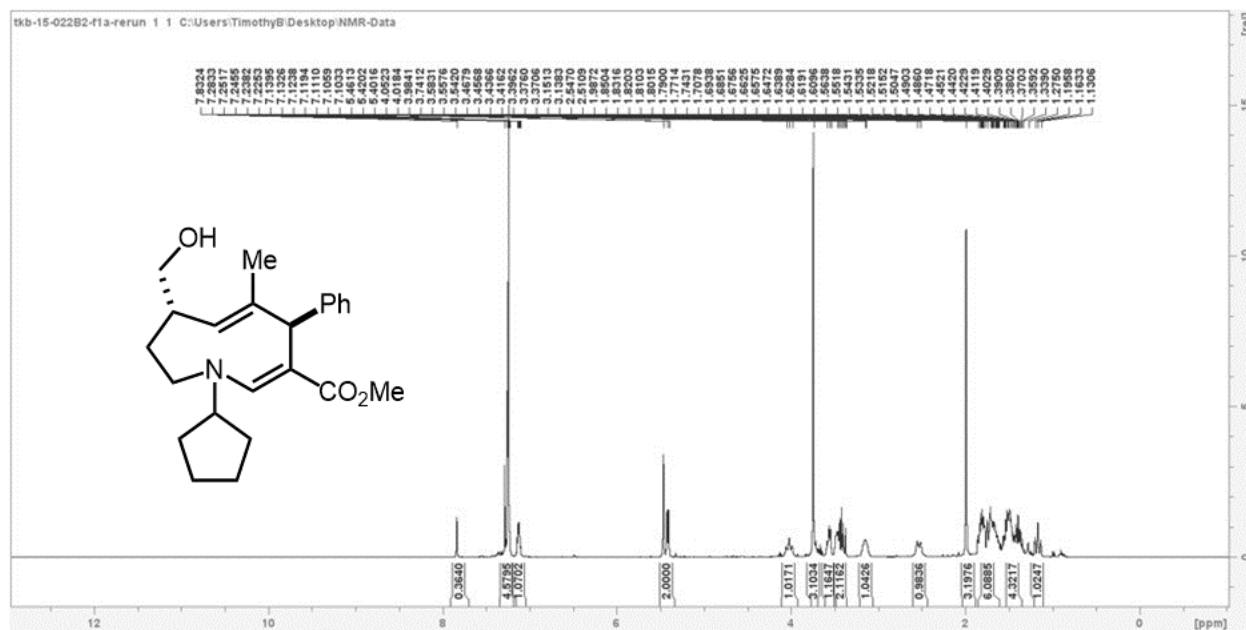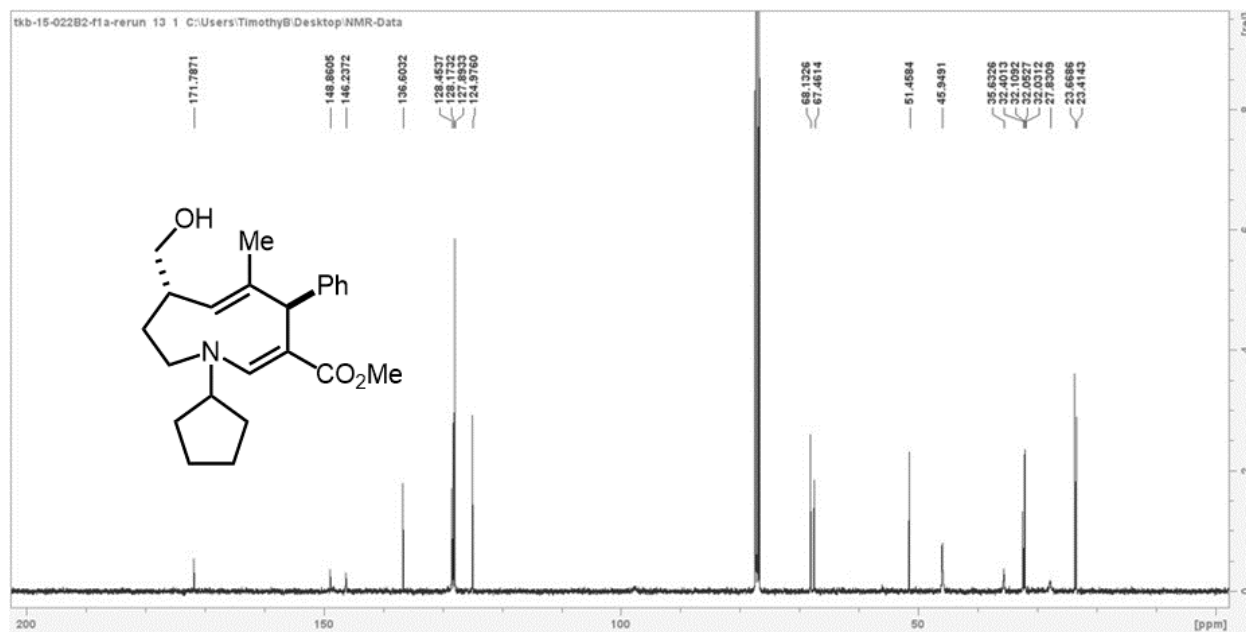

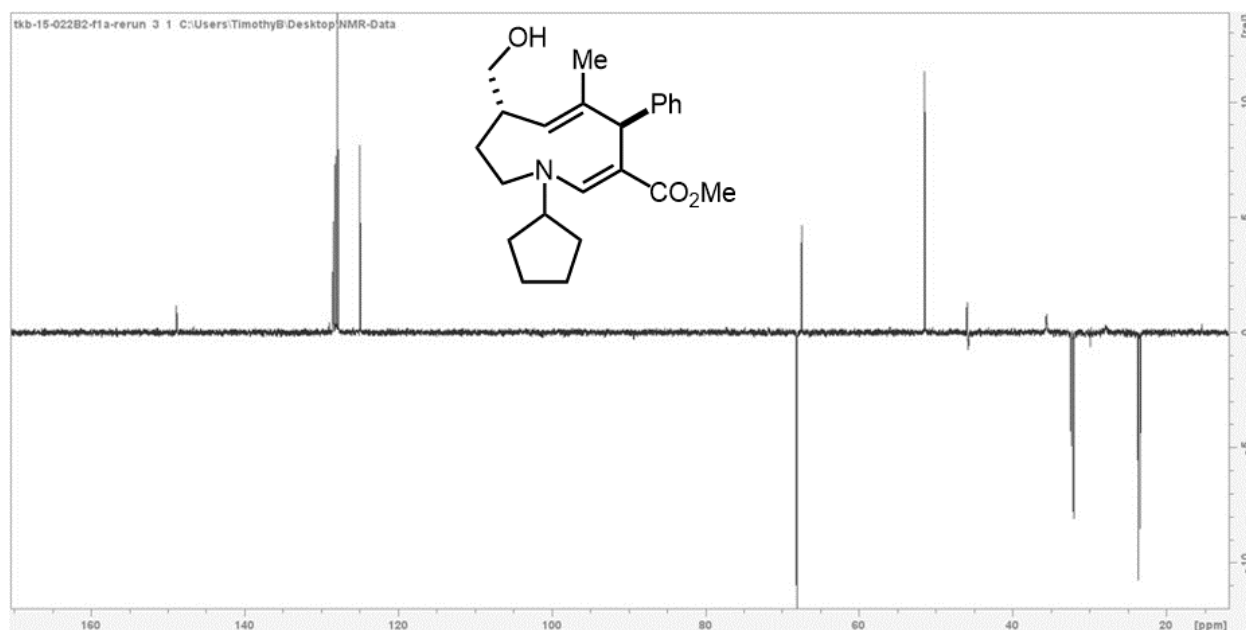

### Compound 8x

Prepared in 1.0 mmol scale using **General Procedure E**. Purification: Flash chromatography on silica eluting with hexane/acetone (90:10 to 70:30). Light orange oil. Yield = 334.0 mg, 84%, >99:1 dr. <sup>1</sup>H NMR (400 MHz, CDCl<sub>3</sub>) δ 7.68 (s, 1H), 7.26 (d, *J* = 4.4 Hz, 4H), 7.14 (p, *J* = 4.3 Hz, 1H), 5.65 – 5.55 (m, 2H), 5.41 (d, *J* = 7.5 Hz, 1H), 4.93 (dt, *J* = 10.4, 1.7 Hz, 1H), 4.56 (d, *J* = 17.1 Hz, 1H), 4.00 (t, *J* = 13.9 Hz, 1H), 3.76 (s, 3H), 3.80 – 3.54 (m, 4H), 3.48 (dt, *J* = 9.2, 5.5 Hz, 1H), 3.24 – 3.15 (m, 1H), 2.38 (d, *J* = 15.0 Hz, 1H), 2.25 – 2.11 (m, 2H), 1.85 – 1.65 (m, 2H), 1.53 – 1.39 (m, 1H), 1.38 – 1.19 (m, 6H), 1.11 (tt, *J* = 13.1, 2.5 Hz, 1H), 0.89 (t, *J* = 6.9 Hz, 3H). <sup>13</sup>C NMR (101 MHz, CDCl<sub>3</sub>) δ 171.62, 151.41, 146.57, 141.75, 133.50, 128.36, 127.97, 127.81, 125.10, 116.35, 97.67, 68.20, 59.53, 51.44, 45.72, 44.30, 35.32, 31.87, 30.69, 30.21, 22.58, 14.13. **HRMS-EI<sup>+</sup>** (*m/z*): calc for C<sub>25</sub>H<sub>35</sub>NO<sub>3</sub> [M]<sup>+</sup> 397.2617, found 397.2622.

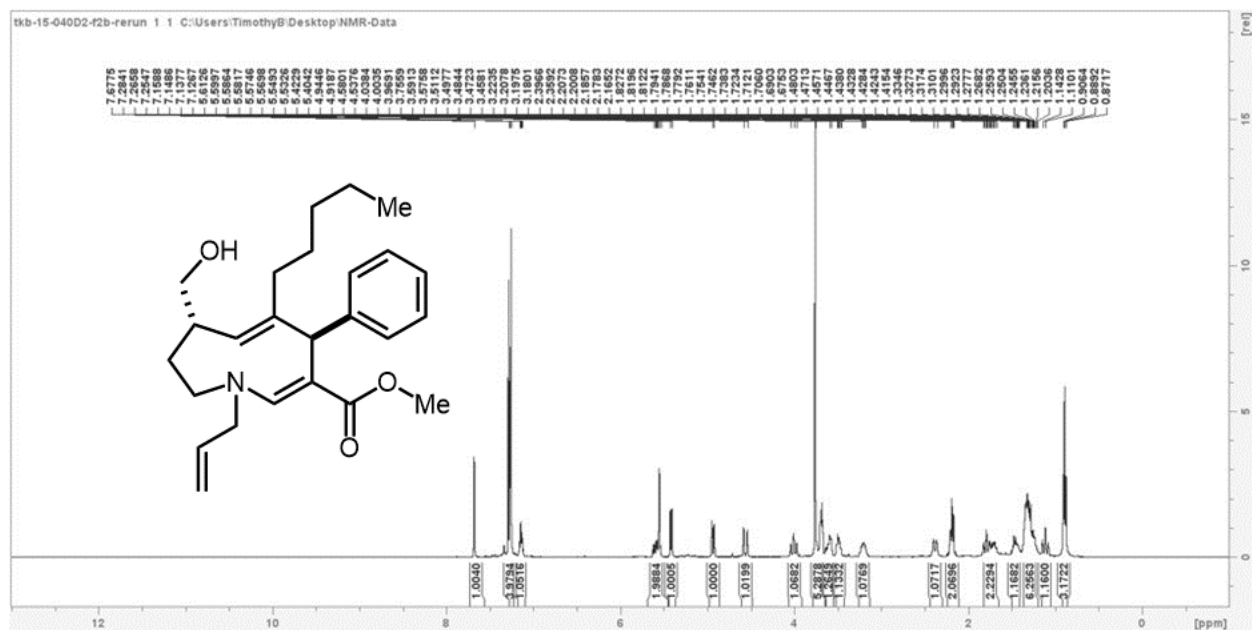

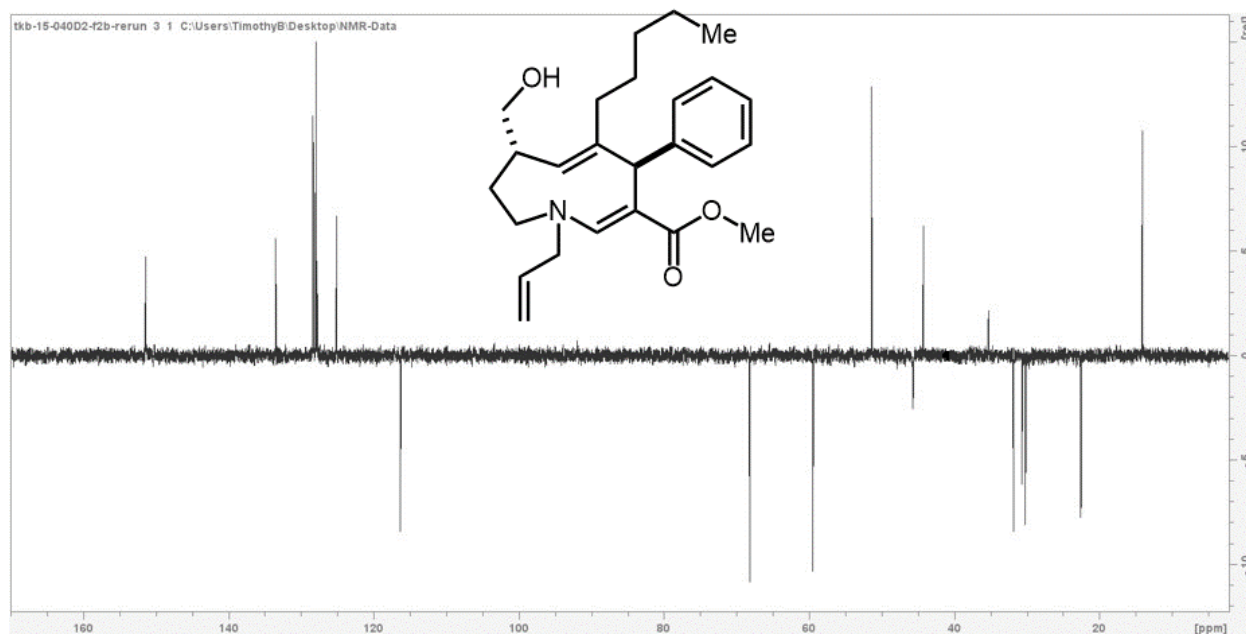

### Compound 8y

Prepared in 1.0 mmol scale using **General Procedure E**. Purification: Flash chromatography on silica eluting with hexane/acetone (90:10 to 50:50). Greenish-yellow oil. Yield = 373.4 mg, 93%, >99:1 dr.  $^1\text{H}$  NMR (400 MHz,  $\text{CDCl}_3$ )  $\delta$  7.88 (s, 1H), 7.11 (d,  $J$  = 6.4 Hz, 2H), 6.72 (d,  $J$  = 6.4 Hz, 2H), 6.03 (dd,  $J$  = 12.1, 6.5 Hz, 1H), 5.46 (dd,  $J$  = 12.1, 8.7 Hz, 1H), 5.39 (d,  $J$  = 6.5 Hz, 1H), 4.07 (q,  $J$  = 7.1 Hz, 2H), 3.71 (s, 3H), 3.58 (ddd,  $J$  = 15.1, 12.7, 2.3 Hz, 1H), 3.31 (p,  $J$  = 6.7 Hz, 1H), 2.82 (t,  $J$  = 10.5 Hz, 1H), 2.62 (d,  $J$  = 15.0 Hz, 1H), 1.85 (td,  $J$  = 13.0, 6.6 Hz, 1H), 1.19 – 1.00 (m, 19H), 1.03 – 0.96 (m, 1H).  $^{13}\text{C}$  NMR (101 MHz,  $\text{CDCl}_3$ )  $\delta$  171.30, 157.22, 147.90, 138.81, 131.26, 127.84, 127.79, 113.50, 95.62, 72.27, 59.80, 57.76, 55.24, 45.44, 43.17, 40.29, 31.11, 28.46, 26.14, 23.01, 22.46, 14.63. **HRMS- $\text{EI}^+$**  ( $m/z$ ): calc for  $\text{C}_{24}\text{H}_{35}\text{NO}_4$   $[\text{M}]^+$  401.2566, found 401.2573.

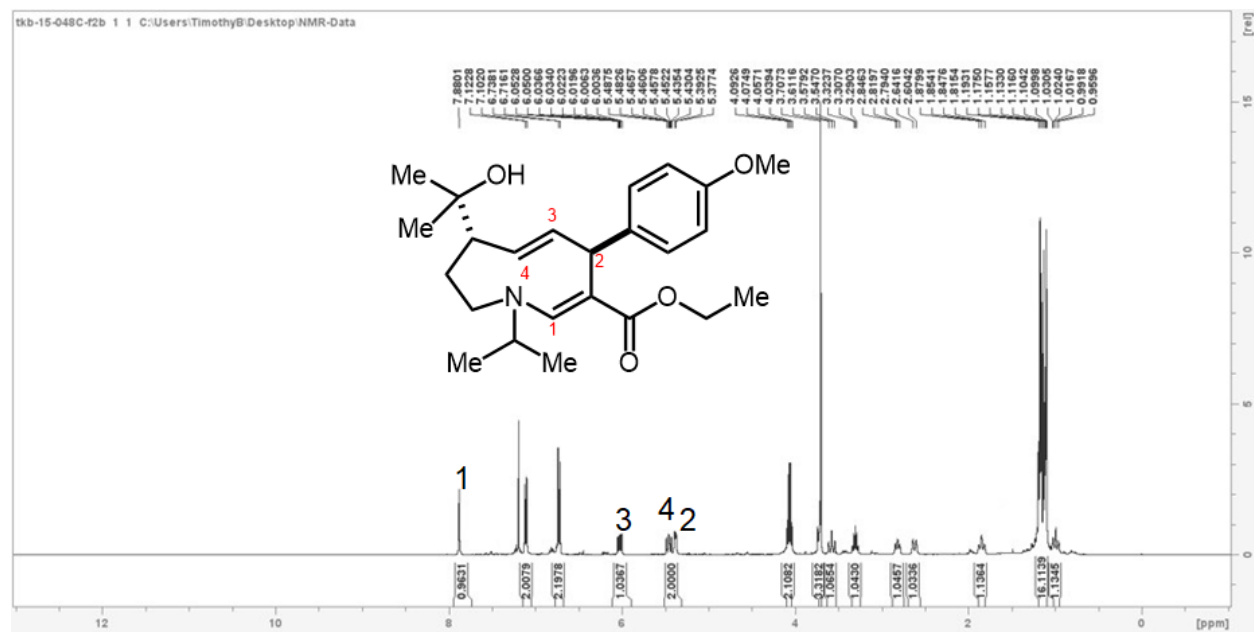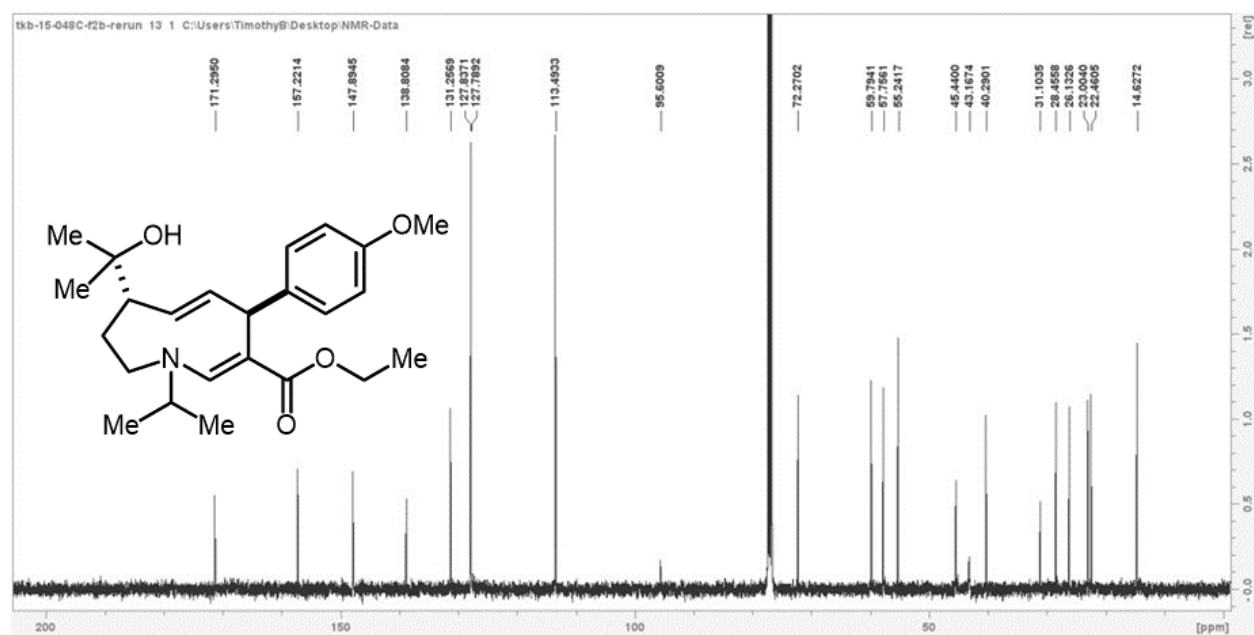

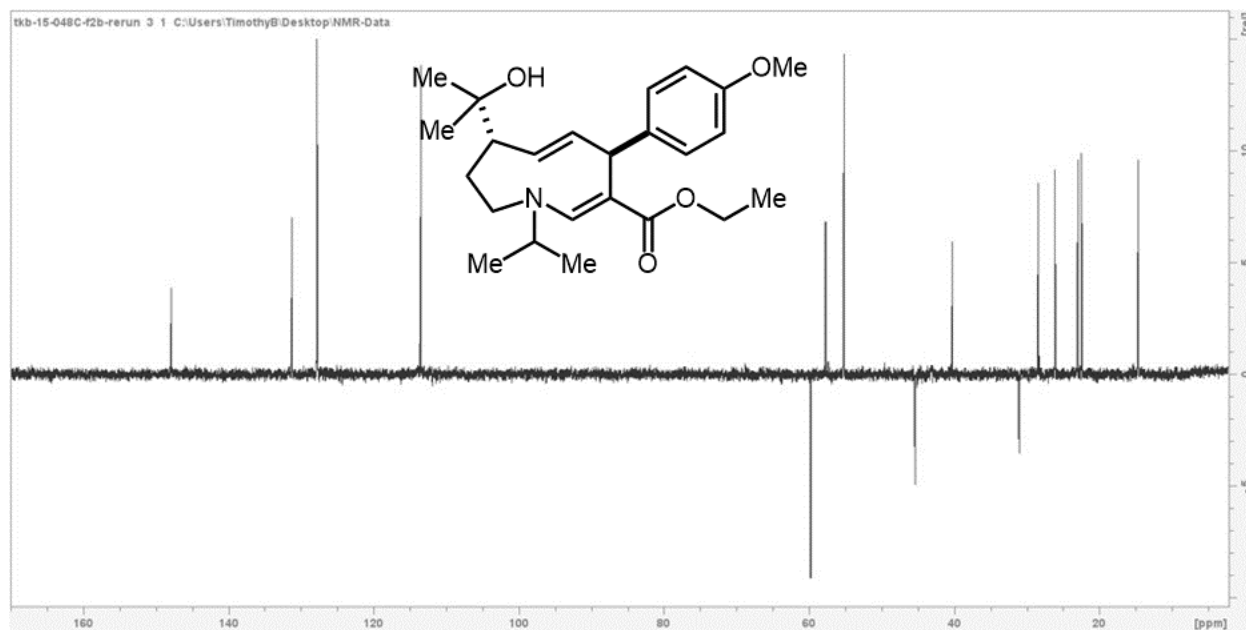

### Compound 8z

Prepared in 1.0 mmol scale using **General Procedure E**. Purification: Flash chromatography on silica eluting with hexane/acetone (90:10 to 50:50). Greenish-yellow oil. Yield = 348.8 mg, 90%, >99:1 dr. <sup>1</sup>H NMR (400 MHz, CDCl<sub>3</sub>) δ 7.98 (s, 1H), 7.20 (d, *J* = 6.7 Hz, 2H), 6.81 (d, *J* = 6.7 Hz, 2H), 6.12 (dd, *J* = 12.3, 6.3 Hz, 1H), 5.60 – 5.46 (m, 2H), 4.22 – 4.09 (m, 1H), 3.80 (s, 3H), 3.76 – 3.62 (m, 4H), 3.40 (p, *J* = 6.7 Hz, 1H), 2.92 (t, *J* = 10.6 Hz, 1H), 2.69 (d, *J* = 14.7 Hz, 1H), 1.93 (tt, *J* = 12.9, 3.1 Hz, 1H), 1.81 – 1.60 (m, 1H), 1.30 – 1.13 (m, 12H), 1.16 – 1.02 (m, 1H). <sup>13</sup>C NMR (101 MHz, CDCl<sub>3</sub>) δ 171.73, 157.25, 148.15, 138.69, 131.17, 127.83, 113.52, 72.25, 57.82, 55.24, 51.43, 45.40, 40.39, 29.13, 28.44, 26.15, 25.10, 23.03, 22.47. **HRMS-EI<sup>+</sup>** (*m/z*): calc for C<sub>23</sub>H<sub>33</sub>NO<sub>4</sub> [M]<sup>+</sup> 387.2410, found 387.2415.

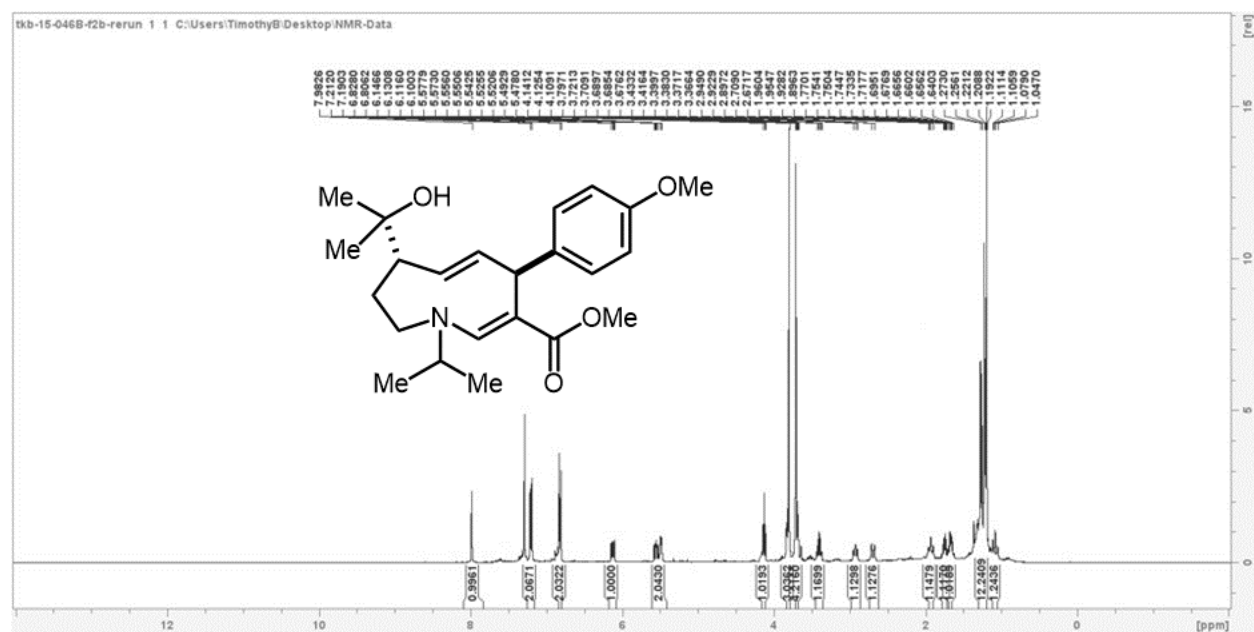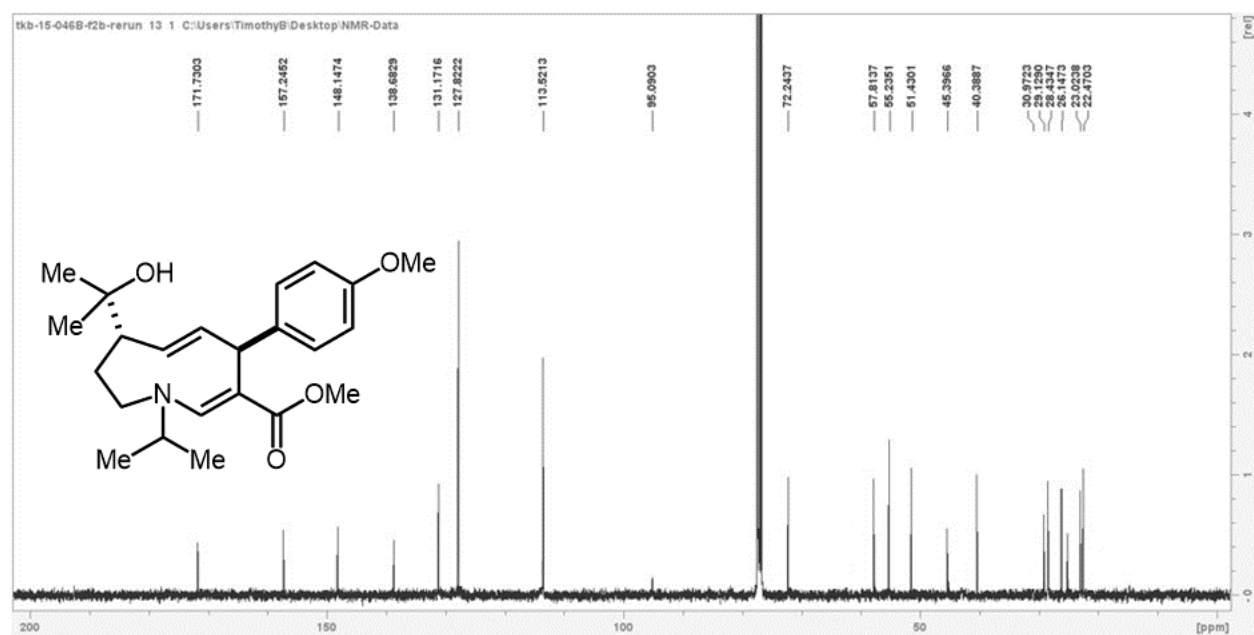



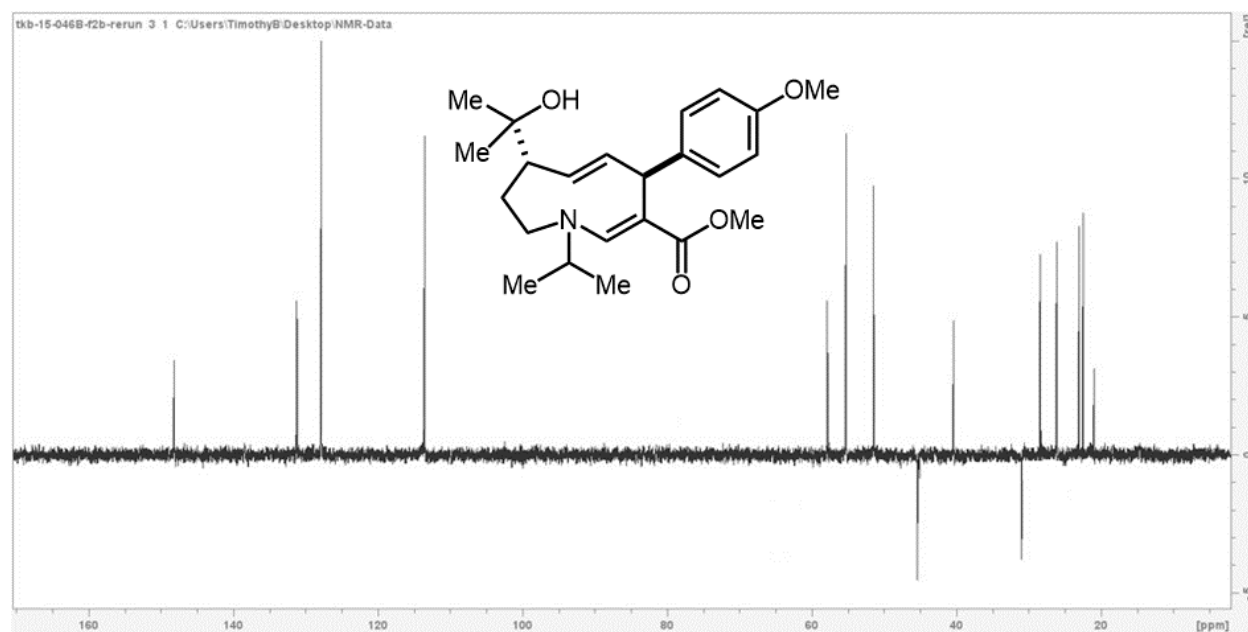

## References

- (1) H. Braunstein, S. Langevin, M. Khim, J. Adamson, K. Hovenkotter, L. Kotlarz, B. Mansker, T. K. Beng; *Org. Biomol. Chem.* 2016, **14**, 8864.  
(2) I. S. Anosike and T. K. Beng, *RSC Adv.*, 2024, **14**, 18501-18507.
